# Supplementary material
Source: publisher figshare collection journal article supplement (https://gsajournals.figshare.com/articles/dataset/_/26311777)
Supplement: Supplementary file 1 [file 1]

## Sheet: supp_table_out
SERIAL	SOURCE	REFERENCE	TYPE FOR UPDATE PAPER	Chromosomal_sex	PERFORMANCE	CONSENSUS	CONSTRUCTS
AA0578	Bin Gu	This manuscript	Outbred_cross	XX	TRUE		Experimental Sample
AA9306	Bin Gu	This manuscript	Outbred_cross	XY	TRUE		Experimental Sample
AB9560	Bin Gu	This manuscript	Outbred_F1	XY	TRUE		Experimental Sample
AD3692	Bin Gu	This manuscript	Outbred_cross	XX	TRUE		Experimental Sample
AF8736	Bin Gu	This manuscript	Outbred_cross	XY	TRUE		Experimental Sample
AG1761	Bin Gu	This manuscript	Inbred	XX	TRUE		Experimental Sample
AH4067	Bin Gu	This manuscript	Outbred_cross	XX	TRUE		Experimental Sample
AH6124	Bin Gu	This manuscript	Outbred_cross	XX	TRUE		Experimental Sample
AM0152	Bin Gu	This manuscript	Outbred_cross	XY	TRUE		Experimental Sample
AM4886	Bin Gu	This manuscript	Outbred_cross	XY	TRUE		Experimental Sample
AN9946	Bin Gu	This manuscript	Outbred_cross	XX	TRUE		Experimental Sample
AP6294	Bin Gu	This manuscript	Outbred_cross	XX	TRUE		Experimental Sample
AP9163	Bin Gu	This manuscript	Outbred_F1	XX	TRUE		Experimental Sample
AQ0205	Bin Gu	This manuscript	Outbred_cross	XY	TRUE		Experimental Sample
AQ8505	Bin Gu	This manuscript	Outbred_F1	XX	TRUE		Experimental Sample
AR1155	Bin Gu	This manuscript	Outbred_cross	XY	TRUE		Experimental Sample
AR2169	Bin Gu	This manuscript	Outbred_cross	XY	TRUE		Experimental Sample
AS1867	Bin Gu	This manuscript	Outbred_cross	XX	TRUE		Experimental Sample
AS2932	Bin Gu	This manuscript	Outbred_cross	XY	TRUE		Experimental Sample
AU5446	Bin Gu	This manuscript	Outbred_cross	XY	TRUE		Experimental Sample
AY5592	Bin Gu	This manuscript	Outbred_cross	XY	TRUE		Experimental Sample
AY9066	Bin Gu	This manuscript	Inbred	XX	TRUE		Experimental Sample
AZ6518	Bin Gu	This manuscript	Inbred	XY	TRUE		Experimental Sample
BA8269	Bin Gu	This manuscript	Outbred_cross	XX	TRUE		Experimental Sample
BC1513	Bin Gu	This manuscript	Outbred_cross	XY	TRUE		Experimental Sample
BC5761	Bin Gu	This manuscript	Outbred_cross	XX	TRUE		Experimental Sample
BD4715	Bin Gu	This manuscript	Outbred_cross	XX	TRUE		Experimental Sample
BD8822	Bin Gu	This manuscript	Outbred_cross	XY	TRUE		Experimental Sample
BH9852	Bin Gu	This manuscript	Outbred_cross	XX	TRUE		Experimental Sample
BI4025	Bin Gu	This manuscript	Outbred_cross	XX	TRUE		Experimental Sample
BI4766	Bin Gu	This manuscript	Outbred_cross	XY	TRUE		Experimental Sample
BK4062	Bin Gu	This manuscript	Outbred_cross	XY	TRUE		Experimental Sample
BN3989	Bin Gu	This manuscript	Outbred_cross	XX	TRUE		Experimental Sample
BN4644	Bin Gu	This manuscript	Outbred_cross	XX	TRUE		Experimental Sample
BQ5380	Bin Gu	This manuscript	Outbred_cross	XX	TRUE		Experimental Sample
BV7975	Bin Gu	This manuscript	Outbred_cross	XX	TRUE		Experimental Sample
BX8085	Bin Gu	This manuscript	Outbred_cross	XX	TRUE		Experimental Sample
BY9274	Bin Gu	This manuscript	Outbred_cross	XX	TRUE		Experimental Sample
BZ1311	Bin Gu	This manuscript	Inbred	XX	TRUE		Experimental Sample
BZ6437	Bin Gu	This manuscript	Outbred_cross	XY	TRUE		Experimental Sample
CC1285	Bin Gu	This manuscript	Outbred_cross	XY	TRUE		Experimental Sample
CC1372	Bin Gu	This manuscript	Outbred_cross	XX	TRUE		Experimental Sample
CC3483	Bin Gu	This manuscript	Outbred_cross	XY	TRUE		Experimental Sample
CD2180	Bin Gu	This manuscript	Outbred_cross	XX	TRUE		Experimental Sample
CE1856	Bin Gu	This manuscript	Outbred_cross	XX	TRUE		Experimental Sample
CF3306	Bin Gu	This manuscript	Outbred_F1	XX	TRUE		Experimental Sample
CF7587	Bin Gu	This manuscript	Outbred_cross	XX	TRUE		Experimental Sample
CF9260	Bin Gu	This manuscript	Outbred_F1	XY	TRUE		Experimental Sample
CJ1247	Bin Gu	This manuscript	Outbred_F1	XY	TRUE		Experimental Sample
CJ3108	Bin Gu	This manuscript	Outbred_cross	XY	TRUE		Experimental Sample
CJ7085	Bin Gu	This manuscript	Outbred_cross	XX	TRUE		Experimental Sample
CL1566	Bin Gu	This manuscript	Outbred_cross	XY	TRUE		Experimental Sample
CL2429	Bin Gu	This manuscript	Inbred	XX	TRUE		Experimental Sample
CN0129	Bin Gu	This manuscript	Outbred_cross	XY	TRUE		Experimental Sample
CR5435	Bin Gu	This manuscript	Outbred_cross	XY	TRUE		Experimental Sample
CS0272	Bin Gu	This manuscript	Outbred_cross	XX	TRUE		Experimental Sample
CU8345	Bin Gu	This manuscript	Outbred_cross	XY	TRUE		Experimental Sample
CV4564	Bin Gu	This manuscript	Outbred_cross	XX	TRUE		Experimental Sample
CX4675	Bin Gu	This manuscript	Outbred_cross	XY	TRUE		Experimental Sample
CZ7840	Bin Gu	This manuscript	Outbred_cross	XY	TRUE		Experimental Sample
DA7643	Bin Gu	This manuscript	Outbred_cross	XX	TRUE		Experimental Sample
DB3329	Bin Gu	This manuscript	Outbred_cross	XY	TRUE		Experimental Sample
DD6304	Bin Gu	This manuscript	Outbred_cross	XX	TRUE		Experimental Sample
DH9825	Bin Gu	This manuscript	Outbred_cross	XY	TRUE		Experimental Sample
DK8096	Bin Gu	This manuscript	Outbred_cross	XY	TRUE		Experimental Sample
DN1722	Bin Gu	This manuscript	Outbred_cross	XX	TRUE		Experimental Sample
DN8377	Bin Gu	This manuscript	Outbred_cross	XY	TRUE		Experimental Sample
DS2589	Bin Gu	This manuscript	Outbred_cross	XX	TRUE		Experimental Sample
DU2485	Bin Gu	This manuscript	Outbred_cross	XX	TRUE		Experimental Sample
DV8210	Bin Gu	This manuscript	Outbred_cross	XX	TRUE		Experimental Sample
DY3809	Bin Gu	This manuscript	Inbred	XY	TRUE		Experimental Sample
EC9717	Bin Gu	This manuscript	Inbred	XX	TRUE		Experimental Sample
EE5138	Bin Gu	This manuscript	Outbred_cross	XY	TRUE		Experimental Sample
EF0011	Bin Gu	This manuscript	Outbred_cross	XY	TRUE		Experimental Sample
EF1934	Bin Gu	This manuscript	Outbred_cross	XX	TRUE		Experimental Sample
EF1940	Bin Gu	This manuscript	Outbred_cross	XX	TRUE		Experimental Sample
EF3226	Bin Gu	This manuscript	Outbred_cross	XX	TRUE		Experimental Sample
EH1756	Bin Gu	This manuscript	Outbred_cross	XY	TRUE		Experimental Sample
EH6245	Bin Gu	This manuscript	Outbred_cross	XX	TRUE		Experimental Sample
EJ4917	Bin Gu	This manuscript	Outbred_cross	XX	TRUE		Experimental Sample
EJ7643	Bin Gu	This manuscript	Outbred_cross	XX	TRUE		Experimental Sample
EK9790	Bin Gu	This manuscript	Outbred_cross	XY	TRUE		Experimental Sample
EL4363	Bin Gu	This manuscript	Outbred_cross	XX	TRUE		Experimental Sample
EL7218	Bin Gu	This manuscript	Outbred_cross	XX	TRUE		Experimental Sample
EM0233	Bin Gu	This manuscript	Outbred_cross	XX	TRUE		Experimental Sample
EM3797	Bin Gu	This manuscript	Outbred_cross	XX	TRUE		Experimental Sample
EM9613	Bin Gu	This manuscript	Outbred_cross	XX	TRUE		Experimental Sample
EP0251	Bin Gu	This manuscript	Outbred_cross	XY	TRUE		Experimental Sample
EP2686	Bin Gu	This manuscript	Outbred_cross	XX	TRUE		Experimental Sample
ER9045	Bin Gu	This manuscript	Outbred_cross	XX	TRUE		Experimental Sample
ES3005	Bin Gu	This manuscript	Outbred_F1	XY	TRUE		Experimental Sample
ET2792	Bin Gu	This manuscript	Outbred_cross	XY	TRUE		Experimental Sample
EW0332	Bin Gu	This manuscript	Outbred_cross	XY	TRUE		Experimental Sample
EX6767	Bin Gu	This manuscript	Outbred_cross	XX	TRUE		Experimental Sample
EY7988	Bin Gu	This manuscript	Outbred_cross	XX	TRUE		Experimental Sample
FB4185	Bin Gu	This manuscript	Outbred_F1	XY	TRUE		Experimental Sample
FD5816	Bin Gu	This manuscript	Outbred_cross	XY	TRUE		Experimental Sample
FE4407	Bin Gu	This manuscript	Outbred_cross	XX	TRUE		Experimental Sample
FE7470	Bin Gu	This manuscript	Outbred_cross	XX	TRUE		Experimental Sample
FJ1973	Bin Gu	This manuscript	Outbred_cross	XY	TRUE		Experimental Sample
FL3395	Bin Gu	This manuscript	Outbred_cross	XX	TRUE		Experimental Sample
FM0447	Bin Gu	This manuscript	Outbred_cross	XY	TRUE		Experimental Sample
FR8105	Bin Gu	This manuscript	Outbred_cross	XX	TRUE		Experimental Sample
FR9958	Bin Gu	This manuscript	Outbred_cross	XX	TRUE		Experimental Sample
FS2618	Bin Gu	This manuscript	Outbred_cross	XY	TRUE		Experimental Sample
FS5140	Bin Gu	This manuscript	Outbred_cross	XX	TRUE		Experimental Sample
FT0002	Bin Gu	This manuscript	Inbred	XX	TRUE		Experimental Sample
FT3706	Bin Gu	This manuscript	Outbred_cross	XY	TRUE		Experimental Sample
FU8952	Bin Gu	This manuscript	Outbred_cross	XX	TRUE		Experimental Sample
FX9908	Bin Gu	This manuscript	Outbred_cross	XY	TRUE		Experimental Sample
FY1498	Bin Gu	This manuscript	Outbred_cross	XY	TRUE		Experimental Sample
GB7221	Bin Gu	This manuscript	Outbred_F1	XY	TRUE		Experimental Sample
GC3533	Bin Gu	This manuscript	Outbred_cross	XX	TRUE		Experimental Sample
GC5355	Bin Gu	This manuscript	Outbred_cross	XY	TRUE		Experimental Sample
GC7034	Bin Gu	This manuscript	Outbred_cross	XY	TRUE		Experimental Sample
GE2598	Bin Gu	This manuscript	Outbred_cross	XX	TRUE		Experimental Sample
GG5078	Bin Gu	This manuscript	Outbred_cross	XY	TRUE		Experimental Sample
GH1715	Bin Gu	This manuscript	Outbred_cross	XX	TRUE		Experimental Sample
GJ2852	Bin Gu	This manuscript	Outbred_cross	XX	TRUE		Experimental Sample
GL4289	Bin Gu	This manuscript	Outbred_cross	XY	TRUE		Experimental Sample
GM9502	Bin Gu	This manuscript	Outbred_cross	XY	TRUE		Experimental Sample
GN1484	Bin Gu	This manuscript	Outbred_cross	XX	TRUE		Experimental Sample
GP1778	Bin Gu	This manuscript	Outbred_cross	XY	TRUE		Experimental Sample
GQ0640	Bin Gu	This manuscript	Outbred_F1	XX	TRUE		Experimental Sample
GQ1340	Bin Gu	This manuscript	Outbred_cross	XX	TRUE		Experimental Sample
GR8769	Bin Gu	This manuscript	Outbred_cross	XX	TRUE		Experimental Sample
GT0522	Bin Gu	This manuscript	Outbred_cross	XY	TRUE		Experimental Sample
GT1485	Bin Gu	This manuscript	Outbred_cross	XX	TRUE		Experimental Sample
GU4779	Bin Gu	This manuscript	Outbred_cross	XY	TRUE		Experimental Sample
GV9341	Bin Gu	This manuscript	Outbred_cross	XX	TRUE		Experimental Sample
GY0286	Bin Gu	This manuscript	Outbred_cross	XX	TRUE		Experimental Sample
GY4221	Bin Gu	This manuscript	Outbred_cross	XX	TRUE		Experimental Sample
HA3142	Bin Gu	This manuscript	Outbred_cross	XY	TRUE		Experimental Sample
HD3257	Bin Gu	This manuscript	Outbred_cross	XX	TRUE		Experimental Sample
HG1473	Bin Gu	This manuscript	Outbred_cross	XX	TRUE		Experimental Sample
HG4742	Bin Gu	This manuscript	Outbred_F1	XY	TRUE		Experimental Sample
HI5520	Bin Gu	This manuscript	Outbred_cross	XY	TRUE		Experimental Sample
HL1500	Bin Gu	This manuscript	Outbred_cross	XY	TRUE		Experimental Sample
HL5432	Bin Gu	This manuscript	Outbred_cross	XY	TRUE		Experimental Sample
HL6669	Bin Gu	This manuscript	Outbred_cross	XY	TRUE		Experimental Sample
HM5952	Bin Gu	This manuscript	Outbred_cross	XY	TRUE		Experimental Sample
HM7116	Bin Gu	This manuscript	Outbred_cross	XY	TRUE		Experimental Sample
HM7527	Bin Gu	This manuscript	Outbred_cross	XX	TRUE		Experimental Sample
HN0537	Bin Gu	This manuscript	Inbred	XY	TRUE		Experimental Sample
HN6884	Bin Gu	This manuscript	Outbred_cross	XX	TRUE		Experimental Sample
HN7086	Bin Gu	This manuscript	Outbred_cross	XX	TRUE		Experimental Sample
HP2806	Bin Gu	This manuscript	Outbred_F1	XX	TRUE		Experimental Sample
HR7155	Bin Gu	This manuscript	Outbred_cross	XY	TRUE		Experimental Sample
HV4619	Bin Gu	This manuscript	Outbred_cross	XY	TRUE		Experimental Sample
HX8590	Bin Gu	This manuscript	Outbred_cross	XX	TRUE		Experimental Sample
IA7358	Bin Gu	This manuscript	Outbred_cross	XX	TRUE		Experimental Sample
IC1172	Bin Gu	This manuscript	Outbred_cross	XX	TRUE		Experimental Sample
IC1320	Bin Gu	This manuscript	Outbred_cross	XY	TRUE		Experimental Sample
ID0984	Bin Gu	This manuscript	Outbred_cross	XY	TRUE		Experimental Sample
IE7271	Bin Gu	This manuscript	Outbred_cross	XY	TRUE		Experimental Sample
IF9847	Bin Gu	This manuscript	Outbred_cross	XY	TRUE		Experimental Sample
IG9042	Bin Gu	This manuscript	Outbred_cross	XY	TRUE		Experimental Sample
IH3877	Bin Gu	This manuscript	Outbred_cross	XY	TRUE		Experimental Sample
IK4581	Bin Gu	This manuscript	Outbred_cross	XX	TRUE		Experimental Sample
IP3281	Bin Gu	This manuscript	Outbred_cross	XY	TRUE		Experimental Sample
IP4893	Bin Gu	This manuscript	Outbred_F1	XX	TRUE		Experimental Sample
IP8492	Bin Gu	This manuscript	Inbred	XY	TRUE		Experimental Sample
IR1206	Bin Gu	This manuscript	Outbred_F1	XY	TRUE		Experimental Sample
IU3527	Bin Gu	This manuscript	Outbred_cross	XY	TRUE		Experimental Sample
IU5865	Bin Gu	This manuscript	Outbred_cross	XY	TRUE		Experimental Sample
IW0590	Bin Gu	This manuscript	Outbred_cross	XX	TRUE		Experimental Sample
IX5979	Bin Gu	This manuscript	Outbred_cross	XY	TRUE		Experimental Sample
IZ8818	Bin Gu	This manuscript	Outbred_cross	XX	TRUE		Experimental Sample
JA3893	Bin Gu	This manuscript	Outbred_cross	XY	TRUE		Experimental Sample
JA5647	Bin Gu	This manuscript	Outbred_cross	XX	TRUE		Experimental Sample
JB3787	Bin Gu	This manuscript	Outbred_cross	XX	TRUE		Experimental Sample
JC5265	Bin Gu	This manuscript	Outbred_cross	XX	TRUE		Experimental Sample
JC6264	Bin Gu	This manuscript	Outbred_cross	XY	TRUE		Experimental Sample
JD3312	Bin Gu	This manuscript	Outbred_cross	XX	TRUE		Experimental Sample
JE3592	Bin Gu	This manuscript	Outbred_cross	XX	TRUE		Experimental Sample
JG5126	Bin Gu	This manuscript	Outbred_cross	XX	TRUE		Experimental Sample
JI0804	Bin Gu	This manuscript	Inbred	XY	TRUE		Experimental Sample
JJ8331	Bin Gu	This manuscript	Outbred_cross	XY	TRUE		Experimental Sample
JK3271	Bin Gu	This manuscript	Outbred_cross	XX	TRUE		Experimental Sample
JK6000	Bin Gu	This manuscript	Outbred_cross	XX	TRUE		Experimental Sample
JM3087	Bin Gu	This manuscript	Outbred_cross	XX	TRUE		Experimental Sample
JM6900	Bin Gu	This manuscript	Outbred_cross	XX	TRUE		Experimental Sample
JQ5679	Bin Gu	This manuscript	Outbred_cross	XX	TRUE		Experimental Sample
JR3106	Bin Gu	This manuscript	Outbred_cross	XY	TRUE		Experimental Sample
JR7163	Bin Gu	This manuscript	Outbred_cross	XY	TRUE		Experimental Sample
JS9732	Bin Gu	This manuscript	Outbred_cross	XX	TRUE		Experimental Sample
JT9414	Bin Gu	This manuscript	Outbred_cross	XX	TRUE		Experimental Sample
JU4306	Bin Gu	This manuscript	Outbred_F1	XY	TRUE		Experimental Sample
JW2250	Bin Gu	This manuscript	Outbred_cross	XY	TRUE		Experimental Sample
JW8937	Bin Gu	This manuscript	Outbred_cross	XY	TRUE		Experimental Sample
JY3628	Bin Gu	This manuscript	Outbred_cross	XX	TRUE		Experimental Sample
JY9216	Bin Gu	This manuscript	Outbred_cross	XX	TRUE		Experimental Sample
KA6033	Bin Gu	This manuscript	Outbred_cross	XX	TRUE		Experimental Sample
KB9665	Bin Gu	This manuscript	Outbred_cross	XY	TRUE		Experimental Sample
KC2131	Bin Gu	This manuscript	Outbred_cross	XY	TRUE		Experimental Sample
KD9258	Bin Gu	This manuscript	Outbred_cross	XY	TRUE		Experimental Sample
KH0127	Bin Gu	This manuscript	Outbred_cross	XY	TRUE		Experimental Sample
KH1818	Bin Gu	This manuscript	Outbred_cross	XY	TRUE		Experimental Sample
KI7658	Bin Gu	This manuscript	Outbred_cross	XY	TRUE		Experimental Sample
KJ0568	Bin Gu	This manuscript	Outbred_cross	XX	TRUE		Experimental Sample
KK4269	Bin Gu	This manuscript	Outbred_cross	XX	TRUE		Experimental Sample
KL6076	Bin Gu	This manuscript	Outbred_cross	XY	TRUE		Experimental Sample
KQ7028	Bin Gu	This manuscript	Outbred_cross	XY	TRUE		Experimental Sample
KQ9227	Bin Gu	This manuscript	Outbred_cross	XY	TRUE		Experimental Sample
KR5034	Bin Gu	This manuscript	Outbred_cross	XX	TRUE		Experimental Sample
KR8920	Bin Gu	This manuscript	Outbred_cross	XY	TRUE		Experimental Sample
KS2382	Bin Gu	This manuscript	Outbred_cross	XY	TRUE		Experimental Sample
KT8907	Bin Gu	This manuscript	Outbred_cross	XX	TRUE		Experimental Sample
KU8382	Bin Gu	This manuscript	Outbred_cross	XY	TRUE		Experimental Sample
KW7957	Bin Gu	This manuscript	Outbred_cross	XX	TRUE		Experimental Sample
KY0772	Bin Gu	This manuscript	Outbred_cross	XX	TRUE		Experimental Sample
KY1239	Bin Gu	This manuscript	Outbred_cross	XX	TRUE		Experimental Sample
KY5962	Bin Gu	This manuscript	Outbred_cross	XX	TRUE		Experimental Sample
KZ0503	Bin Gu	This manuscript	Inbred	XY	TRUE		Experimental Sample
LC4895	Bin Gu	This manuscript	Outbred_cross	XY	TRUE		Experimental Sample
LC8128	Bin Gu	This manuscript	Outbred_cross	XX	TRUE		Experimental Sample
LE3045	Bin Gu	This manuscript	Outbred_cross	XX	TRUE		Experimental Sample
LE3249	Bin Gu	This manuscript	Outbred_cross	XY	TRUE		Experimental Sample
LE9679	Bin Gu	This manuscript	Inbred	XX	TRUE		Experimental Sample
LF8101	Bin Gu	This manuscript	Inbred	XX	TRUE		Experimental Sample
LG4316	Bin Gu	This manuscript	Outbred_cross	XY	TRUE		Experimental Sample
LG5296	Bin Gu	This manuscript	Outbred_cross	XX	TRUE		Experimental Sample
LH0559	Bin Gu	This manuscript	Outbred_cross	XY	TRUE		Experimental Sample
LH3627	Bin Gu	This manuscript	Inbred	XY	TRUE		Experimental Sample
LI2450	Bin Gu	This manuscript	Outbred_cross	XY	TRUE		Experimental Sample
LI4409	Bin Gu	This manuscript	Outbred_cross	XY	TRUE		Experimental Sample
LI6494	Bin Gu	This manuscript	Outbred_cross	XX	TRUE		Experimental Sample
LM5547	Bin Gu	This manuscript	Outbred_cross	XX	TRUE		Experimental Sample
LN0021	Bin Gu	This manuscript	Outbred_cross	XX	TRUE		Experimental Sample
LP2761	Bin Gu	This manuscript	Outbred_cross	XX	TRUE		Experimental Sample
LP7342	Bin Gu	This manuscript	Outbred_cross	XY	TRUE		Experimental Sample
LQ6574	Bin Gu	This manuscript	Outbred_cross	XX	TRUE		Experimental Sample
LQ9829	Bin Gu	This manuscript	Outbred_F1	XY	TRUE		Experimental Sample
LS8480	Bin Gu	This manuscript	Outbred_cross	XX	TRUE		Experimental Sample
LW3625	Bin Gu	This manuscript	Outbred_cross	XX	TRUE		Experimental Sample
LW9875	Bin Gu	This manuscript	Outbred_cross	XY	TRUE		Experimental Sample
LX6850	Bin Gu	This manuscript	Outbred_cross	XY	TRUE		Experimental Sample
LY2681	Bin Gu	This manuscript	Inbred	XX	TRUE		Experimental Sample
LY6062	Bin Gu	This manuscript	Outbred_cross	XY	TRUE		Experimental Sample
LZ5381	Bin Gu	This manuscript	Outbred_F1	XY	TRUE		Experimental Sample
MB5587	Bin Gu	This manuscript	Outbred_cross	XX	TRUE		Experimental Sample
MC8673	Bin Gu	This manuscript	Outbred_cross	XX	TRUE		Experimental Sample
ME3478	Bin Gu	This manuscript	Outbred_cross	XX	TRUE		Experimental Sample
ME5490	Bin Gu	This manuscript	Outbred_cross	XX	TRUE		Experimental Sample
MF2124	Bin Gu	This manuscript	Outbred_cross	XY	TRUE		Experimental Sample
MF3296	Bin Gu	This manuscript	Outbred_cross	XY	TRUE		Experimental Sample
MI4052	Bin Gu	This manuscript	Outbred_cross	XY	TRUE		Experimental Sample
MI4377	Bin Gu	This manuscript	Outbred_cross	XY	TRUE		Experimental Sample
MI6248	Bin Gu	This manuscript	Inbred	XY	TRUE		Experimental Sample
MI6793	Bin Gu	This manuscript	Outbred_cross	XX	TRUE		Experimental Sample
ML2632	Bin Gu	This manuscript	Outbred_cross	XY	TRUE		Experimental Sample
ML3318	Bin Gu	This manuscript	Outbred_F1	XX	TRUE		Experimental Sample
MM3525	Bin Gu	This manuscript	Outbred_cross	XY	TRUE		Experimental Sample
MM8260	Bin Gu	This manuscript	Outbred_F1	XY	TRUE		Experimental Sample
MN0784	Bin Gu	This manuscript	Outbred_cross	XY	TRUE		Experimental Sample
MP9163	Bin Gu	This manuscript	Outbred_cross	XX	TRUE		Experimental Sample
MQ5098	Bin Gu	This manuscript	Outbred_cross	XY	TRUE		Experimental Sample
MS1131	Bin Gu	This manuscript	Outbred_cross	XY	TRUE		Experimental Sample
MT3614	Bin Gu	This manuscript	Outbred_cross	XY	TRUE		Experimental Sample
MU1664	Bin Gu	This manuscript	Outbred_cross	XX	TRUE		Experimental Sample
MV7711	Bin Gu	This manuscript	Outbred_cross	XY	TRUE		Experimental Sample
MX8847	Bin Gu	This manuscript	Outbred_cross	XX	TRUE		Experimental Sample
MZ3316	Bin Gu	This manuscript	Outbred_cross	XX	TRUE		Experimental Sample
NB7229	Bin Gu	This manuscript	Outbred_cross	XX	TRUE		Experimental Sample
ND6190	Bin Gu	This manuscript	Outbred_cross	XY	TRUE		Experimental Sample
NE3995	Bin Gu	This manuscript	Outbred_cross	XX	TRUE		Experimental Sample
NF9666	Bin Gu	This manuscript	Inbred	XX	TRUE		Experimental Sample
NK3848	Bin Gu	This manuscript	Outbred_cross	XX	TRUE		Experimental Sample
NP4851	Bin Gu	This manuscript	Outbred_cross	XX	TRUE		Experimental Sample
NR6907	Bin Gu	This manuscript	Outbred_cross	XY	TRUE		Experimental Sample
NS1337	Bin Gu	This manuscript	Outbred_cross	XX	TRUE		Experimental Sample
NS7257	Bin Gu	This manuscript	Outbred_cross	XX	TRUE		Experimental Sample
NT9005	Bin Gu	This manuscript	Outbred_cross	XY	TRUE		Experimental Sample
NU1744	Bin Gu	This manuscript	Outbred_F1	XY	TRUE		Experimental Sample
NV7631	Bin Gu	This manuscript	Outbred_cross	XY	TRUE		Experimental Sample
NX7827	Bin Gu	This manuscript	Outbred_cross	XX	TRUE		Experimental Sample
NY5302	Bin Gu	This manuscript	Outbred_cross	XX	TRUE		Experimental Sample
NY6017	Bin Gu	This manuscript	Outbred_cross	XY	TRUE		Experimental Sample
PD7039	Bin Gu	This manuscript	Outbred_cross	XX	TRUE		Experimental Sample
PD9000	Bin Gu	This manuscript	Outbred_cross	XX	TRUE		Experimental Sample
PE7288	Bin Gu	This manuscript	Outbred_F1	XY	TRUE		Experimental Sample
PH4777	Bin Gu	This manuscript	Outbred_F1	XY	TRUE		Experimental Sample
PM4271	Bin Gu	This manuscript	Outbred_cross	XY	TRUE		Experimental Sample
PM9431	Bin Gu	This manuscript	Outbred_cross	XX	TRUE		Experimental Sample
PR9306	Bin Gu	This manuscript	Outbred_F1	XX	TRUE		Experimental Sample
PS1707	Bin Gu	This manuscript	Outbred_cross	XY	TRUE		Experimental Sample
PT6163	Bin Gu	This manuscript	Outbred_cross	XX	TRUE		Experimental Sample
PU2577	Bin Gu	This manuscript	Outbred_cross	XY	TRUE		Experimental Sample
PV0091	Bin Gu	This manuscript	Outbred_cross	XY	TRUE		Experimental Sample
PW0679	Bin Gu	This manuscript	Outbred_cross	XY	TRUE		Experimental Sample
PW1821	Bin Gu	This manuscript	Outbred_cross	XX	TRUE		Experimental Sample
PZ3058	Bin Gu	This manuscript	Outbred_cross	XX	TRUE		Experimental Sample
PZ4896	Bin Gu	This manuscript	Inbred	XX	TRUE		Experimental Sample
QC2097	Bin Gu	This manuscript	Inbred	XY	TRUE		Experimental Sample
QC8850	Bin Gu	This manuscript	Outbred_cross	XY	TRUE		Experimental Sample
QD6607	Bin Gu	This manuscript	Outbred_cross	XY	TRUE		Experimental Sample
QD8261	Bin Gu	This manuscript	Outbred_cross	XY	TRUE		Experimental Sample
QF4942	Bin Gu	This manuscript	Outbred_F1	XX	TRUE		Experimental Sample
QF9246	Bin Gu	This manuscript	Inbred	XX	TRUE		Experimental Sample
QG7822	Bin Gu	This manuscript	Outbred_cross	XY	TRUE		Experimental Sample
QK8602	Bin Gu	This manuscript	Outbred_cross	XX	TRUE		Experimental Sample
QK8992	Bin Gu	This manuscript	Outbred_cross	XX	TRUE		Experimental Sample
QL5082	Bin Gu	This manuscript	Outbred_cross	XY	TRUE		Experimental Sample
QQ6290	Bin Gu	This manuscript	Outbred_F1	XX	TRUE		Experimental Sample
QQ8399	Bin Gu	This manuscript	Outbred_cross	XX	TRUE		Experimental Sample
QU8024	Bin Gu	This manuscript	Outbred_cross	XY	TRUE		Experimental Sample
QX2247	Bin Gu	This manuscript	Outbred_cross	XX	TRUE		Experimental Sample
QY7167	Bin Gu	This manuscript	Outbred_cross	XX	TRUE		Experimental Sample
RA2340	Bin Gu	This manuscript	Outbred_F1	XX	TRUE		Experimental Sample
RA3452	Bin Gu	This manuscript	Outbred_cross	XY	TRUE		Experimental Sample
RB1804	Bin Gu	This manuscript	Outbred_cross	XY	TRUE		Experimental Sample
RD4278	Bin Gu	This manuscript	Outbred_cross	XY	TRUE		Experimental Sample
RE2177	Bin Gu	This manuscript	Outbred_cross	XX	TRUE		Experimental Sample
RE4514	Bin Gu	This manuscript	Outbred_cross	XY	TRUE		Experimental Sample
RH4476	Bin Gu	This manuscript	Outbred_cross	XY	TRUE		Experimental Sample
RJ6780	Bin Gu	This manuscript	Outbred_cross	XY	TRUE		Experimental Sample
RL2751	Bin Gu	This manuscript	Outbred_cross	XY	TRUE		Experimental Sample
RR5095	Bin Gu	This manuscript	Outbred_cross	XY	TRUE		Experimental Sample
RS9588	Bin Gu	This manuscript	Outbred_cross	XY	TRUE		Experimental Sample
RT6814	Bin Gu	This manuscript	Inbred	XY	TRUE		Experimental Sample
RX3000	Bin Gu	This manuscript	Outbred_cross	XX	TRUE		Experimental Sample
SA0502	Bin Gu	This manuscript	Outbred_cross	XY	TRUE		Experimental Sample
SB7097	Bin Gu	This manuscript	Outbred_cross	XY	TRUE		Experimental Sample
SB8850	Bin Gu	This manuscript	Outbred_cross	XX	TRUE		Experimental Sample
SC0273	Bin Gu	This manuscript	Outbred_cross	XX	TRUE		Experimental Sample
SI1635	Bin Gu	This manuscript	Outbred_cross	XY	TRUE		Experimental Sample
SI8664	Bin Gu	This manuscript	Outbred_cross	XY	TRUE		Experimental Sample
SK4139	Bin Gu	This manuscript	Inbred	XY	TRUE		Experimental Sample
SL9899	Bin Gu	This manuscript	Outbred_cross	XX	TRUE		Experimental Sample
SM4804	Bin Gu	This manuscript	Outbred_cross	XY	TRUE		Experimental Sample
SM8524	Bin Gu	This manuscript	Outbred_cross	XX	TRUE		Experimental Sample
SN9029	Bin Gu	This manuscript	Outbred_cross	XY	TRUE		Experimental Sample
SQ6905	Bin Gu	This manuscript	Outbred_cross	XY	TRUE		Experimental Sample
ST4999	Bin Gu	This manuscript	Outbred_cross	XY	TRUE		Experimental Sample
SU1163	Bin Gu	This manuscript	Outbred_F1	XX	TRUE		Experimental Sample
SV2179	Bin Gu	This manuscript	Outbred_cross	XY	TRUE		Experimental Sample
SW1626	Bin Gu	This manuscript	Outbred_cross	XY	TRUE		Experimental Sample
SX0114	Bin Gu	This manuscript	Outbred_cross	XX	TRUE		Experimental Sample
SX3728	Bin Gu	This manuscript	Inbred	XX	TRUE		Experimental Sample
TB2131	Bin Gu	This manuscript	Outbred_cross	XX	TRUE		Experimental Sample
TC2307	Bin Gu	This manuscript	Outbred_cross	XX	TRUE		Experimental Sample
TD4466	Bin Gu	This manuscript	Outbred_cross	XX	TRUE		Experimental Sample
TD5703	Bin Gu	This manuscript	Outbred_cross	XY	TRUE		Experimental Sample
TE3000	Bin Gu	This manuscript	Outbred_cross	XX	TRUE		Experimental Sample
TH0775	Bin Gu	This manuscript	Outbred_cross	XY	TRUE		Experimental Sample
TJ4328	Bin Gu	This manuscript	Outbred_cross	XX	TRUE		Experimental Sample
TK3066	Bin Gu	This manuscript	Outbred_cross	XY	TRUE		Experimental Sample
TL5813	Bin Gu	This manuscript	Outbred_F1	XY	TRUE		Experimental Sample
TN6772	Bin Gu	This manuscript	Outbred_cross	XY	TRUE		Experimental Sample
TP0158	Bin Gu	This manuscript	Outbred_cross	XY	TRUE		Experimental Sample
TP6124	Bin Gu	This manuscript	Outbred_cross	XX	TRUE		Experimental Sample
TV2098	Bin Gu	This manuscript	Outbred_cross	XX	TRUE		Experimental Sample
UC0413	Bin Gu	This manuscript	Outbred_cross	XY	TRUE		Experimental Sample
UC2783	Bin Gu	This manuscript	Outbred_cross	XX	TRUE		Experimental Sample
UH4505	Bin Gu	This manuscript	Outbred_cross	XY	TRUE		Experimental Sample
UI9821	Bin Gu	This manuscript	Outbred_cross	XY	TRUE		Experimental Sample
UJ0880	Bin Gu	This manuscript	Outbred_cross	XX	TRUE		Experimental Sample
UM8342	Bin Gu	This manuscript	Outbred_cross	XX	TRUE		Experimental Sample
UP5553	Bin Gu	This manuscript	Outbred_cross	XX	TRUE		Experimental Sample
UR2202	Bin Gu	This manuscript	Outbred_cross	XY	TRUE		Experimental Sample
UR6633	Bin Gu	This manuscript	Outbred_cross	XX	TRUE		Experimental Sample
US6482	Bin Gu	This manuscript	Outbred_cross	XY	TRUE		Experimental Sample
US9170	Bin Gu	This manuscript	Outbred_cross	XX	TRUE		Experimental Sample
UT4684	Bin Gu	This manuscript	Outbred_cross	XX	TRUE		Experimental Sample
UV7369	Bin Gu	This manuscript	Outbred_cross	XX	TRUE		Experimental Sample
UX3976	Bin Gu	This manuscript	Outbred_cross	XX	TRUE		Experimental Sample
UX6457	Bin Gu	This manuscript	Outbred_cross	XX	TRUE		Experimental Sample
UY7672	Bin Gu	This manuscript	Outbred_cross	XX	TRUE		Experimental Sample
UY8704	Bin Gu	This manuscript	Outbred_cross	XY	TRUE		Experimental Sample
VA3571	Bin Gu	This manuscript	Outbred_cross	XY	TRUE		Experimental Sample
VB2257	Bin Gu	This manuscript	Outbred_cross	XX	TRUE		Experimental Sample
VC3239	Bin Gu	This manuscript	Outbred_cross	XX	TRUE		Experimental Sample
VC3535	Bin Gu	This manuscript	Outbred_cross	XX	TRUE		Experimental Sample
VC7825	Bin Gu	This manuscript	Inbred	XY	TRUE		Experimental Sample
VF4803	Bin Gu	This manuscript	Outbred_cross	XY	TRUE		Experimental Sample
VG1230	Bin Gu	This manuscript	Outbred_cross	XX	TRUE		Experimental Sample
VH2973	Bin Gu	This manuscript	Outbred_cross	XY	TRUE		Experimental Sample
VI3910	Bin Gu	This manuscript	Outbred_cross	XY	TRUE		Experimental Sample
VJ5127	Bin Gu	This manuscript	Outbred_cross	XY	TRUE		Experimental Sample
VJ5853	Bin Gu	This manuscript	Outbred_cross	XX	TRUE		Experimental Sample
VJ8567	Bin Gu	This manuscript	Outbred_cross	XX	TRUE		Experimental Sample
VK3734	Bin Gu	This manuscript	Outbred_cross	XX	TRUE		Experimental Sample
VM3408	Bin Gu	This manuscript	Outbred_cross	XX	TRUE		Experimental Sample
VN2094	Bin Gu	This manuscript	Outbred_cross	XY	TRUE		Experimental Sample
VP2024	Bin Gu	This manuscript	Outbred_cross	XY	TRUE		Experimental Sample
VV7693	Bin Gu	This manuscript	Outbred_cross	XY	TRUE		Experimental Sample
VW3180	Bin Gu	This manuscript	Outbred_cross	XY	TRUE		Experimental Sample
VW9387	Bin Gu	This manuscript	Inbred	XY	TRUE		Experimental Sample
VX6751	Bin Gu	This manuscript	Outbred_cross	XY	TRUE		Experimental Sample
WA8086	Bin Gu	This manuscript	Outbred_cross	XX	TRUE		Experimental Sample
WB1289	Bin Gu	This manuscript	Outbred_cross	XX	TRUE		Experimental Sample
WB3897	Bin Gu	This manuscript	Outbred_cross	XY	TRUE		Experimental Sample
WC1058	Bin Gu	This manuscript	Outbred_cross	XY	TRUE		Experimental Sample
WC8937	Bin Gu	This manuscript	Outbred_cross	XY	TRUE		Experimental Sample
WF3688	Bin Gu	This manuscript	Outbred_cross	XY	TRUE		Experimental Sample
WL2411	Bin Gu	This manuscript	Outbred_cross	XX	TRUE		Experimental Sample
WL9771	Bin Gu	This manuscript	Outbred_cross	XX	TRUE		Experimental Sample
WP3946	Bin Gu	This manuscript	Outbred_cross	XX	TRUE		Experimental Sample
WS6140	Bin Gu	This manuscript	Outbred_cross	XY	TRUE		Experimental Sample
WT4494	Bin Gu	This manuscript	Outbred_cross	XX	TRUE		Experimental Sample
WV6134	Bin Gu	This manuscript	Outbred_cross	XX	TRUE		Experimental Sample
WW1121	Bin Gu	This manuscript	Outbred_cross	XY	TRUE		Experimental Sample
WX3199	Bin Gu	This manuscript	Outbred_cross	XX	TRUE		Experimental Sample
WZ0872	Bin Gu	This manuscript	Inbred	XX	TRUE		Experimental Sample
XB9909	Bin Gu	This manuscript	Outbred_cross	XX	TRUE		Experimental Sample
XD2459	Bin Gu	This manuscript	Outbred_cross	XY	TRUE		Experimental Sample
XE2511	Bin Gu	This manuscript	Outbred_cross	XX	TRUE		Experimental Sample
XG0929	Bin Gu	This manuscript	Outbred_cross	XY	TRUE		Experimental Sample
XG3752	Bin Gu	This manuscript	Outbred_cross	XX	TRUE		Experimental Sample
XH6836	Bin Gu	This manuscript	Outbred_cross	XX	TRUE		Experimental Sample
XN6359	Bin Gu	This manuscript	Outbred_cross	XY	TRUE		Experimental Sample
XR1459	Bin Gu	This manuscript	Outbred_cross	XY	TRUE		Experimental Sample
XS4277	Bin Gu	This manuscript	Outbred_cross	XX	TRUE		Experimental Sample
XS4766	Bin Gu	This manuscript	Outbred_cross	XX	TRUE		Experimental Sample
XT1903	Bin Gu	This manuscript	Outbred_cross	XX	TRUE		Experimental Sample
XW2397	Bin Gu	This manuscript	Outbred_cross	XY	TRUE		Experimental Sample
XW9113	Bin Gu	This manuscript	Outbred_cross	XX	TRUE		Experimental Sample
XX0860	Bin Gu	This manuscript	Outbred_F1	XX	TRUE		Experimental Sample
XX0989	Bin Gu	This manuscript	Outbred_cross	XY	TRUE		Experimental Sample
XX8858	Bin Gu	This manuscript	Outbred_cross	XX	TRUE		Experimental Sample
XX9115	Bin Gu	This manuscript	Outbred_cross	XY	TRUE		Experimental Sample
XZ0446	Bin Gu	This manuscript	Outbred_cross	XY	TRUE		Experimental Sample
XZ4290	Bin Gu	This manuscript	Outbred_cross	XX	TRUE		Experimental Sample
YB9275	Bin Gu	This manuscript	Outbred_cross	XX	TRUE		Experimental Sample
YC6061	Bin Gu	This manuscript	Outbred_F1	XY	TRUE		Experimental Sample
YD1418	Bin Gu	This manuscript	Outbred_cross	XY	TRUE		Experimental Sample
YD3332	Bin Gu	This manuscript	Inbred	XY	TRUE		Experimental Sample
YD7491	Bin Gu	This manuscript	Outbred_cross	XX	TRUE		Experimental Sample
YE6487	Bin Gu	This manuscript	Outbred_cross	XX	TRUE		Experimental Sample
YE9456	Bin Gu	This manuscript	Outbred_cross	XX	TRUE		Experimental Sample
YH7229	Bin Gu	This manuscript	Outbred_cross	XX	TRUE		Experimental Sample
YI7605	Bin Gu	This manuscript	Outbred_cross	XX	TRUE		Experimental Sample
YJ0744	Bin Gu	This manuscript	Outbred_cross	XY	TRUE		Experimental Sample
YM0393	Bin Gu	This manuscript	Outbred_cross	XY	TRUE		Experimental Sample
YM0520	Bin Gu	This manuscript	Outbred_cross	XX	TRUE		Experimental Sample
YN6856	Bin Gu	This manuscript	Inbred	XY	TRUE		Experimental Sample
YP0812	Bin Gu	This manuscript	Outbred_cross	XY	TRUE		Experimental Sample
YP2987	Bin Gu	This manuscript	Outbred_cross	XX	TRUE		Experimental Sample
YQ7180	Bin Gu	This manuscript	Outbred_cross	XX	TRUE		Experimental Sample
YR1590	Bin Gu	This manuscript	Outbred_cross	XX	TRUE		Experimental Sample
YR5985	Bin Gu	This manuscript	Outbred_cross	XX	TRUE		Experimental Sample
YS5585	Bin Gu	This manuscript	Outbred_cross	XX	TRUE		Experimental Sample
YS8417	Bin Gu	This manuscript	Outbred_cross	XX	TRUE		Experimental Sample
YT1110	Bin Gu	This manuscript	Outbred_F1	XY	TRUE		Experimental Sample
YT5800	Bin Gu	This manuscript	Outbred_cross	XY	TRUE		Experimental Sample
YU8742	Bin Gu	This manuscript	Outbred_cross	XX	TRUE		Experimental Sample
YV0981	Bin Gu	This manuscript	Outbred_cross	XY	TRUE		Experimental Sample
YV7429	Bin Gu	This manuscript	Outbred_F1	XX	TRUE		Experimental Sample
YX5486	Bin Gu	This manuscript	Outbred_F1	XX	TRUE		Experimental Sample
YY4953	Bin Gu	This manuscript	Inbred	XX	TRUE		Experimental Sample
ZC5246	Bin Gu	This manuscript	Outbred_cross	XY	TRUE		Experimental Sample
ZE4907	Bin Gu	This manuscript	Outbred_F1	XX	TRUE		Experimental Sample
ZE5546	Bin Gu	This manuscript	Outbred_cross	XX	TRUE		Experimental Sample
ZF1049	Bin Gu	This manuscript	Inbred	XX	TRUE		Experimental Sample
ZF2569	Bin Gu	This manuscript	Outbred_cross	XY	TRUE		Experimental Sample
ZF2671	Bin Gu	This manuscript	Outbred_cross	XX	TRUE		Experimental Sample
ZF6748	Bin Gu	This manuscript	Outbred_F1	XX	TRUE		Experimental Sample
ZG2042	Bin Gu	This manuscript	Outbred_cross	XX	TRUE		Experimental Sample
ZJ8983	Bin Gu	This manuscript	Outbred_cross	XX	TRUE		Experimental Sample
ZK1537	Bin Gu	This manuscript	Outbred_F1	XY	TRUE		Experimental Sample
ZK9891	Bin Gu	This manuscript	Outbred_F1	XY	TRUE		Experimental Sample
ZL2682	Bin Gu	This manuscript	Outbred_cross	XX	TRUE		Experimental Sample
ZM2933	Bin Gu	This manuscript	Outbred_F1	XY	TRUE		Experimental Sample
ZN0032	Bin Gu	This manuscript	Outbred_cross	XX	TRUE		Experimental Sample
ZP4902	Bin Gu	This manuscript	Outbred_cross	XY	TRUE		Experimental Sample
ZQ3958	Bin Gu	This manuscript	Outbred_cross	XX	TRUE		Experimental Sample
ZR5862	Bin Gu	This manuscript	Outbred_cross	XY	TRUE		Experimental Sample
ZT1243	Bin Gu	This manuscript	Outbred_cross	XY	TRUE		Experimental Sample
ZU7874	Bin Gu	This manuscript	Outbred_cross	XY	TRUE		Experimental Sample
ZV3816	Bin Gu	This manuscript	Outbred_cross	XX	TRUE		Experimental Sample
ZY0949	Bin Gu	This manuscript	Outbred_cross	XY	TRUE		Experimental Sample
ZY3460	Bin Gu	This manuscript	Outbred_cross	XY	TRUE		Experimental Sample
ZY4185	Bin Gu	This manuscript	Inbred	XY	TRUE		Experimental Sample
ZZ6721	Bin Gu	This manuscript	Outbred_F1	XY	TRUE		Experimental Sample
DY2146	Buddy Weisman	This manuscript	Outbred_cross	XX	TRUE		Experimental Sample
FZ8243	Buddy Weisman	This manuscript	Outbred_cross	XY	TRUE		Experimental Sample
KN7428	Buddy Weisman	This manuscript	Outbred_cross	XX	TRUE		Experimental Sample
SD5467	Buddy Weisman	This manuscript	Outbred_cross	XY	TRUE		Experimental Sample
AB2443	Chris Sassetti	This manuscript	Outbred_cross	XY	TRUE		Experimental Sample
AC1164	Chris Sassetti	This manuscript	Outbred_cross	XY	TRUE		Experimental Sample
AC8989	Chris Sassetti	This manuscript	Outbred_cross	XX	TRUE		Experimental Sample
AD5777	Chris Sassetti	This manuscript	Outbred_cross	XX	TRUE		Experimental Sample
AE8968	Chris Sassetti	This manuscript	Outbred_cross	XY	TRUE		Experimental Sample
AF7498	Chris Sassetti	This manuscript	Outbred_cross	XX	TRUE		Experimental Sample
AG0647	Chris Sassetti	This manuscript	Outbred_cross	XY	TRUE		Experimental Sample
AG2713	Chris Sassetti	This manuscript	Outbred_cross	XY	TRUE		Experimental Sample
AG5193	Chris Sassetti	This manuscript	Outbred_cross	XY	TRUE		Experimental Sample
AG9032	Chris Sassetti	This manuscript	Outbred_cross	XY	TRUE		Experimental Sample
AJ9016	Chris Sassetti	This manuscript	Outbred_cross	XX	TRUE		Experimental Sample
AL9864	Chris Sassetti	This manuscript	Outbred_cross	XX	TRUE		Experimental Sample
AP0214	Chris Sassetti	This manuscript	Outbred_cross	XY	TRUE		Experimental Sample
AS4000	Chris Sassetti	This manuscript	Outbred_cross	XX	TRUE		Experimental Sample
AU3338	Chris Sassetti	This manuscript	Outbred_cross	XY	TRUE		Experimental Sample
AV5960	Chris Sassetti	This manuscript	Outbred_cross	XX	TRUE		Experimental Sample
AW1195	Chris Sassetti	This manuscript	Outbred_cross	XY	TRUE		Experimental Sample
AX9846	Chris Sassetti	This manuscript	Outbred_cross	XX	TRUE		Experimental Sample
AZ4716	Chris Sassetti	This manuscript	Outbred_cross	XX	TRUE		Experimental Sample
AZ8159	Chris Sassetti	This manuscript	Outbred_cross	XX	TRUE		Experimental Sample
BA0709	Chris Sassetti	This manuscript	Outbred_cross	XX	TRUE		Experimental Sample
BB3302	Chris Sassetti	This manuscript	Outbred_cross	XY	TRUE		Experimental Sample
BE4147	Chris Sassetti	This manuscript	Outbred_cross	XY	TRUE		Experimental Sample
BF0589	Chris Sassetti	This manuscript	Outbred_cross	XY	TRUE		Experimental Sample
BH3175	Chris Sassetti	This manuscript	Outbred_cross	XX	TRUE		Experimental Sample
BH3563	Chris Sassetti	This manuscript	Outbred_cross	XX	TRUE		Experimental Sample
BH9062	Chris Sassetti	This manuscript	Outbred_cross	XX	TRUE		Experimental Sample
BK3350	Chris Sassetti	This manuscript	Outbred_cross	XX	TRUE		Experimental Sample
BK7570	Chris Sassetti	This manuscript	Outbred_cross	XY	TRUE		Experimental Sample
BK9145	Chris Sassetti	This manuscript	Outbred_cross	XY	TRUE		Experimental Sample
BL7087	Chris Sassetti	This manuscript	Outbred_cross	XX	TRUE		Experimental Sample
BM6191	Chris Sassetti	This manuscript	Outbred_cross	XX	TRUE		Experimental Sample
BN6655	Chris Sassetti	This manuscript	Outbred_cross	XY	TRUE		Experimental Sample
BN8383	Chris Sassetti	This manuscript	Outbred_cross	XY	TRUE		Experimental Sample
BP8015	Chris Sassetti	This manuscript	Outbred_cross	XY	TRUE		Experimental Sample
BP9334	Chris Sassetti	This manuscript	Outbred_cross	XY	TRUE		Experimental Sample
BQ7735	Chris Sassetti	This manuscript	Outbred_cross	XX	TRUE		Experimental Sample
BV4005	Chris Sassetti	This manuscript	Outbred_cross	XX	TRUE		Experimental Sample
BW9143	Chris Sassetti	This manuscript	Outbred_cross	XY	TRUE		Experimental Sample
BX9073	Chris Sassetti	This manuscript	Outbred_cross	XX	TRUE		Experimental Sample
BY1340	Chris Sassetti	This manuscript	Outbred_cross	XY	TRUE		Experimental Sample
BY5822	Chris Sassetti	This manuscript	Outbred_cross	XY	TRUE		Experimental Sample
CA5397	Chris Sassetti	This manuscript	Outbred_cross	XY	TRUE		Experimental Sample
CB4624	Chris Sassetti	This manuscript	Outbred_cross	XY	TRUE		Experimental Sample
CC0519	Chris Sassetti	This manuscript	Outbred_cross	XX	TRUE		Experimental Sample
CD1097	Chris Sassetti	This manuscript	Outbred_cross	XX	TRUE		Experimental Sample
CJ3980	Chris Sassetti	This manuscript	Outbred_cross	XY	TRUE		Experimental Sample
CK7776	Chris Sassetti	This manuscript	Outbred_cross	XX	TRUE		Experimental Sample
CL5101	Chris Sassetti	This manuscript	Outbred_cross	XY	TRUE		Experimental Sample
CN6959	Chris Sassetti	This manuscript	Outbred_cross	XX	TRUE		Experimental Sample
CP3718	Chris Sassetti	This manuscript	Outbred_cross	XY	TRUE		Experimental Sample
CP5541	Chris Sassetti	This manuscript	Outbred_cross	XY	TRUE		Experimental Sample
CQ3368	Chris Sassetti	This manuscript	Outbred_cross	XX	TRUE		Experimental Sample
CV7851	Chris Sassetti	This manuscript	Outbred_cross	XX	TRUE		Experimental Sample
CW0051	Chris Sassetti	This manuscript	Outbred_cross	XY	TRUE		Experimental Sample
CX2436	Chris Sassetti	This manuscript	Outbred_cross	XY	TRUE		Experimental Sample
CZ6732	Chris Sassetti	This manuscript	Outbred_cross	XY	TRUE		Experimental Sample
DA4820	Chris Sassetti	This manuscript	Outbred_cross	XX	TRUE		Experimental Sample
DA6771	Chris Sassetti	This manuscript	Outbred_cross	XY	TRUE		Experimental Sample
DB6888	Chris Sassetti	This manuscript	Outbred_cross	XY	TRUE		Experimental Sample
DC0566	Chris Sassetti	This manuscript	Outbred_cross	XX	TRUE		Experimental Sample
DD4457	Chris Sassetti	This manuscript	Outbred_cross	XX	TRUE		Experimental Sample
DG9981	Chris Sassetti	This manuscript	Outbred_cross	XX	TRUE		Experimental Sample
DH1314	Chris Sassetti	This manuscript	Outbred_cross	XY	TRUE		Experimental Sample
DH4876	Chris Sassetti	This manuscript	Outbred_cross	XX	TRUE		Experimental Sample
DJ3971	Chris Sassetti	This manuscript	Outbred_cross	XX	TRUE		Experimental Sample
DN5011	Chris Sassetti	This manuscript	Outbred_cross	XY	TRUE		Experimental Sample
DN8483	Chris Sassetti	This manuscript	Outbred_cross	XY	TRUE		Experimental Sample
DP8476	Chris Sassetti	This manuscript	Outbred_cross	XX	TRUE		Experimental Sample
DS5300	Chris Sassetti	This manuscript	Outbred_cross	XY	TRUE		Experimental Sample
DS5858	Chris Sassetti	This manuscript	Outbred_cross	XY	TRUE		Experimental Sample
DU4854	Chris Sassetti	This manuscript	Outbred_cross	XX	TRUE		Experimental Sample
DY3723	Chris Sassetti	This manuscript	Outbred_cross	XX	TRUE		Experimental Sample
DZ3768	Chris Sassetti	This manuscript	Outbred_cross	XX	TRUE		Experimental Sample
EA7818	Chris Sassetti	This manuscript	Outbred_cross	XY	TRUE		Experimental Sample
EC3952	Chris Sassetti	This manuscript	Outbred_cross	XX	TRUE		Experimental Sample
EE6976	Chris Sassetti	This manuscript	Outbred_cross	XY	TRUE		Experimental Sample
EG9038	Chris Sassetti	This manuscript	Outbred_cross	XY	TRUE		Experimental Sample
EG9198	Chris Sassetti	This manuscript	Outbred_cross	XX	TRUE		Experimental Sample
EI0822	Chris Sassetti	This manuscript	Outbred_cross	XY	TRUE		Experimental Sample
EK9333	Chris Sassetti	This manuscript	Outbred_cross	XY	TRUE		Experimental Sample
EL8911	Chris Sassetti	This manuscript	Outbred_cross	XX	TRUE		Experimental Sample
EM6725	Chris Sassetti	This manuscript	Outbred_cross	XY	TRUE		Experimental Sample
EN1920	Chris Sassetti	This manuscript	Outbred_cross	XX	TRUE		Experimental Sample
EN6445	Chris Sassetti	This manuscript	Outbred_cross	XY	TRUE		Experimental Sample
EP7880	Chris Sassetti	This manuscript	Outbred_cross	XX	TRUE		Experimental Sample
EQ2117	Chris Sassetti	This manuscript	Outbred_cross	XX	TRUE		Experimental Sample
ES8970	Chris Sassetti	This manuscript	Outbred_cross	XY	TRUE		Experimental Sample
ET9995	Chris Sassetti	This manuscript	Outbred_cross	XX	TRUE		Experimental Sample
EU3993	Chris Sassetti	This manuscript	Outbred_cross	XY	TRUE		Experimental Sample
EU7325	Chris Sassetti	This manuscript	Outbred_cross	XX	TRUE		Experimental Sample
EU9229	Chris Sassetti	This manuscript	Outbred_cross	XY	TRUE		Experimental Sample
EX5418	Chris Sassetti	This manuscript	Outbred_cross	XX	TRUE		Experimental Sample
EX8135	Chris Sassetti	This manuscript	Outbred_cross	XX	TRUE		Experimental Sample
EY0271	Chris Sassetti	This manuscript	Outbred_cross	XY	TRUE		Experimental Sample
EY1218	Chris Sassetti	This manuscript	Outbred_cross	XY	TRUE		Experimental Sample
EY5242	Chris Sassetti	This manuscript	Outbred_cross	XX	TRUE		Experimental Sample
EZ4237	Chris Sassetti	This manuscript	Outbred_cross	XX	TRUE		Experimental Sample
EZ9355	Chris Sassetti	This manuscript	Outbred_cross	XX	TRUE		Experimental Sample
FA3639	Chris Sassetti	This manuscript	Outbred_cross	XY	TRUE		Experimental Sample
FB3534	Chris Sassetti	This manuscript	Outbred_cross	XX	TRUE		Experimental Sample
FD7016	Chris Sassetti	This manuscript	Outbred_cross	XX	TRUE		Experimental Sample
FH0390	Chris Sassetti	This manuscript	Outbred_cross	XY	TRUE		Experimental Sample
FN4617	Chris Sassetti	This manuscript	Outbred_cross	XY	TRUE		Experimental Sample
FP0188	Chris Sassetti	This manuscript	Outbred_cross	XX	TRUE		Experimental Sample
FR6255	Chris Sassetti	This manuscript	Outbred_cross	XY	TRUE		Experimental Sample
FS2322	Chris Sassetti	This manuscript	Outbred_cross	XX	TRUE		Experimental Sample
FT0508	Chris Sassetti	This manuscript	Outbred_cross	XY	TRUE		Experimental Sample
FT0631	Chris Sassetti	This manuscript	Outbred_cross	XY	TRUE		Experimental Sample
FU5834	Chris Sassetti	This manuscript	Outbred_cross	XX	TRUE		Experimental Sample
GA3591	Chris Sassetti	This manuscript	Outbred_cross	XX	TRUE		Experimental Sample
GC6040	Chris Sassetti	This manuscript	Outbred_cross	XX	TRUE		Experimental Sample
GC9955	Chris Sassetti	This manuscript	Outbred_cross	XY	TRUE		Experimental Sample
GD3684	Chris Sassetti	This manuscript	Outbred_cross	XX	TRUE		Experimental Sample
GD7598	Chris Sassetti	This manuscript	Outbred_cross	XX	TRUE		Experimental Sample
GE8775	Chris Sassetti	This manuscript	Outbred_cross	XY	TRUE		Experimental Sample
GG8009	Chris Sassetti	This manuscript	Outbred_cross	XX	TRUE		Experimental Sample
GJ0322	Chris Sassetti	This manuscript	Outbred_cross	XX	TRUE		Experimental Sample
GJ3518	Chris Sassetti	This manuscript	Outbred_cross	XY	TRUE		Experimental Sample
GJ6855	Chris Sassetti	This manuscript	Outbred_cross	XX	TRUE		Experimental Sample
GK8725	Chris Sassetti	This manuscript	Outbred_cross	XY	TRUE		Experimental Sample
GM3470	Chris Sassetti	This manuscript	Outbred_cross	XY	TRUE		Experimental Sample
GM6433	Chris Sassetti	This manuscript	Outbred_cross	XX	TRUE		Experimental Sample
GN4177	Chris Sassetti	This manuscript	Outbred_cross	XX	TRUE		Experimental Sample
GN4731	Chris Sassetti	This manuscript	Outbred_cross	XX	TRUE		Experimental Sample
GQ5852	Chris Sassetti	This manuscript	Outbred_cross	XY	TRUE		Experimental Sample
GR4924	Chris Sassetti	This manuscript	Outbred_cross	XX	TRUE		Experimental Sample
GT2463	Chris Sassetti	This manuscript	Outbred_cross	XY	TRUE		Experimental Sample
GZ2146	Chris Sassetti	This manuscript	Outbred_cross	XY	TRUE		Experimental Sample
GZ4903	Chris Sassetti	This manuscript	Outbred_cross	XX	TRUE		Experimental Sample
GZ8806	Chris Sassetti	This manuscript	Outbred_cross	XY	TRUE		Experimental Sample
HB2966	Chris Sassetti	This manuscript	Outbred_cross	XY	TRUE		Experimental Sample
HD9801	Chris Sassetti	This manuscript	Outbred_cross	XX	TRUE		Experimental Sample
HF1998	Chris Sassetti	This manuscript	Outbred_cross	XX	TRUE		Experimental Sample
HG2824	Chris Sassetti	This manuscript	Outbred_cross	XY	TRUE		Experimental Sample
HI1829	Chris Sassetti	This manuscript	Outbred_cross	XY	TRUE		Experimental Sample
HK7864	Chris Sassetti	This manuscript	Outbred_cross	XY	TRUE		Experimental Sample
HN2772	Chris Sassetti	This manuscript	Outbred_cross	XY	TRUE		Experimental Sample
HP8016	Chris Sassetti	This manuscript	Outbred_cross	XY	TRUE		Experimental Sample
HR4726	Chris Sassetti	This manuscript	Outbred_cross	XX	TRUE		Experimental Sample
HW2910	Chris Sassetti	This manuscript	Outbred_cross	XX	TRUE		Experimental Sample
HW7041	Chris Sassetti	This manuscript	Outbred_cross	XY	TRUE		Experimental Sample
HZ2554	Chris Sassetti	This manuscript	Outbred_cross	XX	TRUE		Experimental Sample
HZ4080	Chris Sassetti	This manuscript	Outbred_cross	XY	TRUE		Experimental Sample
IA8016	Chris Sassetti	This manuscript	Outbred_cross	XY	TRUE		Experimental Sample
IA9111	Chris Sassetti	This manuscript	Outbred_cross	XY	TRUE		Experimental Sample
IB7466	Chris Sassetti	This manuscript	Outbred_cross	XY	TRUE		Experimental Sample
ID0128	Chris Sassetti	This manuscript	Outbred_cross	XX	TRUE		Experimental Sample
IG3350	Chris Sassetti	This manuscript	Outbred_cross	XX	TRUE		Experimental Sample
IG4393	Chris Sassetti	This manuscript	Outbred_cross	XX	TRUE		Experimental Sample
IJ2755	Chris Sassetti	This manuscript	Outbred_cross	XX	TRUE		Experimental Sample
IJ5479	Chris Sassetti	This manuscript	Outbred_cross	XY	TRUE		Experimental Sample
IJ5992	Chris Sassetti	This manuscript	Outbred_cross	XX	TRUE		Experimental Sample
IK5585	Chris Sassetti	This manuscript	Outbred_cross	XX	TRUE		Experimental Sample
IL9875	Chris Sassetti	This manuscript	Outbred_cross	XY	TRUE		Experimental Sample
IM4833	Chris Sassetti	This manuscript	Outbred_cross	XX	TRUE		Experimental Sample
IM9653	Chris Sassetti	This manuscript	Outbred_cross	XY	TRUE		Experimental Sample
IR9423	Chris Sassetti	This manuscript	Outbred_cross	XX	TRUE		Experimental Sample
IS4932	Chris Sassetti	This manuscript	Outbred_cross	XY	TRUE		Experimental Sample
IT1873	Chris Sassetti	This manuscript	Outbred_cross	XY	TRUE		Experimental Sample
IT2937	Chris Sassetti	This manuscript	Outbred_cross	XX	TRUE		Experimental Sample
IU0516	Chris Sassetti	This manuscript	Outbred_cross	XY	TRUE		Experimental Sample
IU6269	Chris Sassetti	This manuscript	Outbred_cross	XX	TRUE		Experimental Sample
IU7665	Chris Sassetti	This manuscript	Outbred_cross	XY	TRUE		Experimental Sample
IV3944	Chris Sassetti	This manuscript	Outbred_cross	XY	TRUE		Experimental Sample
JD6032	Chris Sassetti	This manuscript	Outbred_cross	XY	TRUE		Experimental Sample
JF2008	Chris Sassetti	This manuscript	Outbred_cross	XY	TRUE		Experimental Sample
JH6985	Chris Sassetti	This manuscript	Outbred_cross	XX	TRUE		Experimental Sample
JI6275	Chris Sassetti	This manuscript	Outbred_cross	XY	TRUE		Experimental Sample
JJ7379	Chris Sassetti	This manuscript	Outbred_cross	XY	TRUE		Experimental Sample
JL2893	Chris Sassetti	This manuscript	Outbred_cross	XX	TRUE		Experimental Sample
JL5941	Chris Sassetti	This manuscript	Outbred_cross	XX	TRUE		Experimental Sample
JM7022	Chris Sassetti	This manuscript	Outbred_cross	XY	TRUE		Experimental Sample
JP8537	Chris Sassetti	This manuscript	Outbred_cross	XY	TRUE		Experimental Sample
JR4331	Chris Sassetti	This manuscript	Outbred_cross	XY	TRUE		Experimental Sample
JS1185	Chris Sassetti	This manuscript	Outbred_cross	XX	TRUE		Experimental Sample
JU4814	Chris Sassetti	This manuscript	Outbred_cross	XX	TRUE		Experimental Sample
JV0599	Chris Sassetti	This manuscript	Outbred_cross	XX	TRUE		Experimental Sample
JX8532	Chris Sassetti	This manuscript	Outbred_cross	XY	TRUE		Experimental Sample
KA7364	Chris Sassetti	This manuscript	Outbred_cross	XX	TRUE		Experimental Sample
KB5812	Chris Sassetti	This manuscript	Outbred_cross	XY	TRUE		Experimental Sample
KB6285	Chris Sassetti	This manuscript	Outbred_cross	XY	TRUE		Experimental Sample
KD4201	Chris Sassetti	This manuscript	Outbred_cross	XY	TRUE		Experimental Sample
KE6124	Chris Sassetti	This manuscript	Outbred_cross	XY	TRUE		Experimental Sample
KG1120	Chris Sassetti	This manuscript	Outbred_cross	XY	TRUE		Experimental Sample
KG8934	Chris Sassetti	This manuscript	Outbred_cross	XY	TRUE		Experimental Sample
KH9796	Chris Sassetti	This manuscript	Outbred_cross	XY	TRUE		Experimental Sample
KI4397	Chris Sassetti	This manuscript	Outbred_cross	XX	TRUE		Experimental Sample
KI5960	Chris Sassetti	This manuscript	Outbred_cross	XX	TRUE		Experimental Sample
KJ0372	Chris Sassetti	This manuscript	Outbred_cross	XY	TRUE		Experimental Sample
KM1046	Chris Sassetti	This manuscript	Outbred_cross	XX	TRUE		Experimental Sample
KM3147	Chris Sassetti	This manuscript	Outbred_cross	XY	TRUE		Experimental Sample
KN8137	Chris Sassetti	This manuscript	Outbred_cross	XY	TRUE		Experimental Sample
KP0019	Chris Sassetti	This manuscript	Outbred_cross	XX	TRUE		Experimental Sample
KQ1895	Chris Sassetti	This manuscript	Outbred_cross	XY	TRUE		Experimental Sample
KQ7474	Chris Sassetti	This manuscript	Outbred_cross	XY	TRUE		Experimental Sample
KU4174	Chris Sassetti	This manuscript	Outbred_cross	XY	TRUE		Experimental Sample
KZ6714	Chris Sassetti	This manuscript	Outbred_cross	XX	TRUE		Experimental Sample
LB2669	Chris Sassetti	This manuscript	Outbred_cross	XX	TRUE		Experimental Sample
LC7409	Chris Sassetti	This manuscript	Outbred_cross	XX	TRUE		Experimental Sample
LE7559	Chris Sassetti	This manuscript	Outbred_cross	XY	TRUE		Experimental Sample
LE7956	Chris Sassetti	This manuscript	Outbred_cross	XY	TRUE		Experimental Sample
LF3844	Chris Sassetti	This manuscript	Outbred_cross	XX	TRUE		Experimental Sample
LG7830	Chris Sassetti	This manuscript	Outbred_cross	XX	TRUE		Experimental Sample
LI6636	Chris Sassetti	This manuscript	Outbred_cross	XY	TRUE		Experimental Sample
LK6545	Chris Sassetti	This manuscript	Outbred_cross	XY	TRUE		Experimental Sample
LK6896	Chris Sassetti	This manuscript	Outbred_cross	XY	TRUE		Experimental Sample
LM2245	Chris Sassetti	This manuscript	Outbred_cross	XX	TRUE		Experimental Sample
LN9900	Chris Sassetti	This manuscript	Outbred_cross	XY	TRUE		Experimental Sample
LP9676	Chris Sassetti	This manuscript	Outbred_cross	XY	TRUE		Experimental Sample
LR4944	Chris Sassetti	This manuscript	Outbred_cross	XY	TRUE		Experimental Sample
LT4847	Chris Sassetti	This manuscript	Outbred_cross	XY	TRUE		Experimental Sample
LT5711	Chris Sassetti	This manuscript	Outbred_cross	XY	TRUE		Experimental Sample
LY8800	Chris Sassetti	This manuscript	Outbred_cross	XX	TRUE		Experimental Sample
LZ1522	Chris Sassetti	This manuscript	Outbred_cross	XY	TRUE		Experimental Sample
LZ7987	Chris Sassetti	This manuscript	Outbred_cross	XY	TRUE		Experimental Sample
MA0650	Chris Sassetti	This manuscript	Outbred_cross	XY	TRUE		Experimental Sample
MC4928	Chris Sassetti	This manuscript	Outbred_cross	XX	TRUE		Experimental Sample
MC9095	Chris Sassetti	This manuscript	Outbred_cross	XX	TRUE		Experimental Sample
MC9653	Chris Sassetti	This manuscript	Outbred_cross	XY	TRUE		Experimental Sample
MD7988	Chris Sassetti	This manuscript	Outbred_cross	XY	TRUE		Experimental Sample
ME0765	Chris Sassetti	This manuscript	Outbred_cross	XX	TRUE		Experimental Sample
MH6165	Chris Sassetti	This manuscript	Outbred_cross	XY	TRUE		Experimental Sample
MH6494	Chris Sassetti	This manuscript	Outbred_cross	XX	TRUE		Experimental Sample
MI3693	Chris Sassetti	This manuscript	Outbred_cross	XX	TRUE		Experimental Sample
MR0742	Chris Sassetti	This manuscript	Outbred_cross	XY	TRUE		Experimental Sample
MV6179	Chris Sassetti	This manuscript	Outbred_cross	XX	TRUE		Experimental Sample
MW4421	Chris Sassetti	This manuscript	Outbred_cross	XY	TRUE		Experimental Sample
MX4409	Chris Sassetti	This manuscript	Outbred_cross	XY	TRUE		Experimental Sample
MX6543	Chris Sassetti	This manuscript	Outbred_cross	XX	TRUE		Experimental Sample
MX8988	Chris Sassetti	This manuscript	Outbred_cross	XX	TRUE		Experimental Sample
MY0400	Chris Sassetti	This manuscript	Outbred_cross	XY	TRUE		Experimental Sample
MY4710	Chris Sassetti	This manuscript	Outbred_cross	XX	TRUE		Experimental Sample
MZ4880	Chris Sassetti	This manuscript	Outbred_cross	XX	TRUE		Experimental Sample
NA7595	Chris Sassetti	This manuscript	Outbred_cross	XX	TRUE		Experimental Sample
NB5140	Chris Sassetti	This manuscript	Outbred_cross	XY	TRUE		Experimental Sample
NB7277	Chris Sassetti	This manuscript	Outbred_cross	XX	TRUE		Experimental Sample
ND0466	Chris Sassetti	This manuscript	Outbred_cross	XX	TRUE		Experimental Sample
NE5200	Chris Sassetti	This manuscript	Outbred_cross	XX	TRUE		Experimental Sample
NE8309	Chris Sassetti	This manuscript	Outbred_cross	XX	TRUE		Experimental Sample
NF7134	Chris Sassetti	This manuscript	Outbred_cross	XY	TRUE		Experimental Sample
NH1727	Chris Sassetti	This manuscript	Outbred_cross	XY	TRUE		Experimental Sample
NI5088	Chris Sassetti	This manuscript	Outbred_cross	XX	TRUE		Experimental Sample
NI7268	Chris Sassetti	This manuscript	Outbred_cross	XX	TRUE		Experimental Sample
NI7876	Chris Sassetti	This manuscript	Outbred_cross	XX	TRUE		Experimental Sample
NJ2533	Chris Sassetti	This manuscript	Outbred_cross	XY	TRUE		Experimental Sample
NJ4835	Chris Sassetti	This manuscript	Outbred_cross	XY	TRUE		Experimental Sample
NJ7850	Chris Sassetti	This manuscript	Outbred_cross	XX	TRUE		Experimental Sample
NK0688	Chris Sassetti	This manuscript	Outbred_cross	XY	TRUE		Experimental Sample
NM2963	Chris Sassetti	This manuscript	Outbred_cross	XX	TRUE		Experimental Sample
NM3004	Chris Sassetti	This manuscript	Outbred_cross	XY	TRUE		Experimental Sample
NM3806	Chris Sassetti	This manuscript	Outbred_cross	XY	TRUE		Experimental Sample
NM4081	Chris Sassetti	This manuscript	Outbred_cross	XY	TRUE		Experimental Sample
NM7959	Chris Sassetti	This manuscript	Outbred_cross	XX	TRUE		Experimental Sample
NP1642	Chris Sassetti	This manuscript	Outbred_cross	XY	TRUE		Experimental Sample
NP2547	Chris Sassetti	This manuscript	Outbred_cross	XY	TRUE		Experimental Sample
NQ3026	Chris Sassetti	This manuscript	Outbred_cross	XY	TRUE		Experimental Sample
NS2749	Chris Sassetti	This manuscript	Outbred_cross	XY	TRUE		Experimental Sample
NS3685	Chris Sassetti	This manuscript	Outbred_cross	XY	TRUE		Experimental Sample
NY0481	Chris Sassetti	This manuscript	Outbred_cross	XY	TRUE		Experimental Sample
OZ0443	Chris Sassetti	This manuscript	Outbred_cross	XX	TRUE		Experimental Sample
PA9023	Chris Sassetti	This manuscript	Outbred_cross	XX	TRUE		Experimental Sample
PE0511	Chris Sassetti	This manuscript	Outbred_cross	XX	TRUE		Experimental Sample
PE0934	Chris Sassetti	This manuscript	Outbred_cross	XX	TRUE		Experimental Sample
PE3896	Chris Sassetti	This manuscript	Outbred_cross	XY	TRUE		Experimental Sample
PE6802	Chris Sassetti	This manuscript	Outbred_cross	XY	TRUE		Experimental Sample
PE9785	Chris Sassetti	This manuscript	Outbred_cross	XX	TRUE		Experimental Sample
PF5953	Chris Sassetti	This manuscript	Outbred_cross	XY	TRUE		Experimental Sample
PF9253	Chris Sassetti	This manuscript	Outbred_cross	XY	TRUE		Experimental Sample
PI0303	Chris Sassetti	This manuscript	Outbred_cross	XY	TRUE		Experimental Sample
PJ4495	Chris Sassetti	This manuscript	Outbred_cross	XY	TRUE		Experimental Sample
PQ5930	Chris Sassetti	This manuscript	Outbred_cross	XX	TRUE		Experimental Sample
PQ7433	Chris Sassetti	This manuscript	Outbred_cross	XX	TRUE		Experimental Sample
PQ8567	Chris Sassetti	This manuscript	Outbred_cross	XX	TRUE		Experimental Sample
PT2051	Chris Sassetti	This manuscript	Outbred_cross	XY	TRUE		Experimental Sample
PU8103	Chris Sassetti	This manuscript	Outbred_cross	XY	TRUE		Experimental Sample
PY6583	Chris Sassetti	This manuscript	Outbred_cross	XY	TRUE		Experimental Sample
PY7386	Chris Sassetti	This manuscript	Outbred_cross	XY	TRUE		Experimental Sample
QA6381	Chris Sassetti	This manuscript	Outbred_cross	XY	TRUE		Experimental Sample
QA6964	Chris Sassetti	This manuscript	Outbred_cross	XY	TRUE		Experimental Sample
QC5629	Chris Sassetti	This manuscript	Outbred_cross	XY	TRUE		Experimental Sample
QD0094	Chris Sassetti	This manuscript	Outbred_cross	XY	TRUE		Experimental Sample
QD5637	Chris Sassetti	This manuscript	Outbred_cross	XY	TRUE		Experimental Sample
QH1075	Chris Sassetti	This manuscript	Outbred_cross	XX	TRUE		Experimental Sample
QH4779	Chris Sassetti	This manuscript	Outbred_cross	XY	TRUE		Experimental Sample
QH8472	Chris Sassetti	This manuscript	Outbred_cross	XX	TRUE		Experimental Sample
QL6335	Chris Sassetti	This manuscript	Outbred_cross	XY	TRUE		Experimental Sample
QM1937	Chris Sassetti	This manuscript	Outbred_cross	XX	TRUE		Experimental Sample
QQ0768	Chris Sassetti	This manuscript	Outbred_cross	XY	TRUE		Experimental Sample
QR0730	Chris Sassetti	This manuscript	Outbred_cross	XY	TRUE		Experimental Sample
QV5730	Chris Sassetti	This manuscript	Outbred_cross	XY	TRUE		Experimental Sample
QW0203	Chris Sassetti	This manuscript	Outbred_cross	XY	TRUE		Experimental Sample
QW5328	Chris Sassetti	This manuscript	Outbred_cross	XX	TRUE		Experimental Sample
QY3108	Chris Sassetti	This manuscript	Outbred_cross	XX	TRUE		Experimental Sample
RA2646	Chris Sassetti	This manuscript	Outbred_cross	XY	TRUE		Experimental Sample
RA6176	Chris Sassetti	This manuscript	Outbred_cross	XX	TRUE		Experimental Sample
RC0949	Chris Sassetti	This manuscript	Outbred_cross	XY	TRUE		Experimental Sample
RC9552	Chris Sassetti	This manuscript	Outbred_cross	XY	TRUE		Experimental Sample
RD8625	Chris Sassetti	This manuscript	Outbred_cross	XX	TRUE		Experimental Sample
RE8823	Chris Sassetti	This manuscript	Outbred_cross	XX	TRUE		Experimental Sample
RF1524	Chris Sassetti	This manuscript	Outbred_cross	XY	TRUE		Experimental Sample
RF6362	Chris Sassetti	This manuscript	Outbred_cross	XY	TRUE		Experimental Sample
RH5092	Chris Sassetti	This manuscript	Outbred_cross	XX	TRUE		Experimental Sample
RK1103	Chris Sassetti	This manuscript	Outbred_cross	XX	TRUE		Experimental Sample
RK9090	Chris Sassetti	This manuscript	Outbred_cross	XY	TRUE		Experimental Sample
RL3604	Chris Sassetti	This manuscript	Outbred_cross	XY	TRUE		Experimental Sample
RM1981	Chris Sassetti	This manuscript	Outbred_cross	XY	TRUE		Experimental Sample
RP1924	Chris Sassetti	This manuscript	Outbred_cross	XX	TRUE		Experimental Sample
RQ8673	Chris Sassetti	This manuscript	Outbred_cross	XY	TRUE		Experimental Sample
RR8828	Chris Sassetti	This manuscript	Outbred_cross	XX	TRUE		Experimental Sample
RS3309	Chris Sassetti	This manuscript	Outbred_cross	XY	TRUE		Experimental Sample
RS9295	Chris Sassetti	This manuscript	Outbred_cross	XY	TRUE		Experimental Sample
RT7993	Chris Sassetti	This manuscript	Outbred_cross	XY	TRUE		Experimental Sample
RX7938	Chris Sassetti	This manuscript	Outbred_cross	XX	TRUE		Experimental Sample
RY2371	Chris Sassetti	This manuscript	Outbred_cross	XX	TRUE		Experimental Sample
SA3466	Chris Sassetti	This manuscript	Outbred_cross	XY	TRUE		Experimental Sample
SA5320	Chris Sassetti	This manuscript	Outbred_cross	XY	TRUE		Experimental Sample
SC5234	Chris Sassetti	This manuscript	Outbred_cross	XY	TRUE		Experimental Sample
SD4921	Chris Sassetti	This manuscript	Outbred_cross	XY	TRUE		Experimental Sample
SD8987	Chris Sassetti	This manuscript	Outbred_cross	XX	TRUE		Experimental Sample
SD9905	Chris Sassetti	This manuscript	Outbred_cross	XY	TRUE		Experimental Sample
SE9043	Chris Sassetti	This manuscript	Outbred_cross	XX	TRUE		Experimental Sample
SG5844	Chris Sassetti	This manuscript	Outbred_cross	XY	TRUE		Experimental Sample
SI5679	Chris Sassetti	This manuscript	Outbred_cross	XX	TRUE		Experimental Sample
SJ0783	Chris Sassetti	This manuscript	Outbred_cross	XX	TRUE		Experimental Sample
SK2956	Chris Sassetti	This manuscript	Outbred_cross	XX	TRUE		Experimental Sample
SK4500	Chris Sassetti	This manuscript	Outbred_cross	XY	TRUE		Experimental Sample
SK8917	Chris Sassetti	This manuscript	Outbred_cross	XX	TRUE		Experimental Sample
SL3290	Chris Sassetti	This manuscript	Outbred_cross	XY	TRUE		Experimental Sample
SP4042	Chris Sassetti	This manuscript	Outbred_cross	XX	TRUE		Experimental Sample
SU0498	Chris Sassetti	This manuscript	Outbred_cross	XX	TRUE		Experimental Sample
SU7054	Chris Sassetti	This manuscript	Outbred_cross	XX	TRUE		Experimental Sample
SW7135	Chris Sassetti	This manuscript	Outbred_cross	XY	TRUE		Experimental Sample
TA4995	Chris Sassetti	This manuscript	Outbred_cross	XY	TRUE		Experimental Sample
TA5375	Chris Sassetti	This manuscript	Outbred_cross	XX	TRUE		Experimental Sample
TC8399	Chris Sassetti	This manuscript	Outbred_cross	XY	TRUE		Experimental Sample
TF2653	Chris Sassetti	This manuscript	Outbred_cross	XX	TRUE		Experimental Sample
TG1824	Chris Sassetti	This manuscript	Outbred_cross	XY	TRUE		Experimental Sample
TG3145	Chris Sassetti	This manuscript	Outbred_cross	XY	TRUE		Experimental Sample
TI8619	Chris Sassetti	This manuscript	Outbred_cross	XY	TRUE		Experimental Sample
TJ8785	Chris Sassetti	This manuscript	Outbred_cross	XY	TRUE		Experimental Sample
TU8505	Chris Sassetti	This manuscript	Outbred_cross	XX	TRUE		Experimental Sample
TV2459	Chris Sassetti	This manuscript	Outbred_cross	XX	TRUE		Experimental Sample
TY1651	Chris Sassetti	This manuscript	Outbred_cross	XX	TRUE		Experimental Sample
TZ2149	Chris Sassetti	This manuscript	Outbred_cross	XX	TRUE		Experimental Sample
UA6737	Chris Sassetti	This manuscript	Outbred_cross	XY	TRUE		Experimental Sample
UD4571	Chris Sassetti	This manuscript	Outbred_cross	XX	TRUE		Experimental Sample
UE1377	Chris Sassetti	This manuscript	Outbred_cross	XX	TRUE		Experimental Sample
UE8470	Chris Sassetti	This manuscript	Outbred_cross	XY	TRUE		Experimental Sample
UG8461	Chris Sassetti	This manuscript	Outbred_cross	XY	TRUE		Experimental Sample
UG8803	Chris Sassetti	This manuscript	Outbred_cross	XX	TRUE		Experimental Sample
UJ3028	Chris Sassetti	This manuscript	Outbred_cross	XY	TRUE		Experimental Sample
UJ3282	Chris Sassetti	This manuscript	Outbred_cross	XX	TRUE		Experimental Sample
UK4607	Chris Sassetti	This manuscript	Outbred_cross	XX	TRUE		Experimental Sample
UM1460	Chris Sassetti	This manuscript	Outbred_cross	XX	TRUE		Experimental Sample
UN5139	Chris Sassetti	This manuscript	Outbred_cross	XX	TRUE		Experimental Sample
UP3146	Chris Sassetti	This manuscript	Outbred_cross	XY	TRUE		Experimental Sample
UP3651	Chris Sassetti	This manuscript	Outbred_cross	XX	TRUE		Experimental Sample
UQ0830	Chris Sassetti	This manuscript	Outbred_cross	XY	TRUE		Experimental Sample
UQ5460	Chris Sassetti	This manuscript	Outbred_cross	XY	TRUE		Experimental Sample
UR2882	Chris Sassetti	This manuscript	Outbred_cross	XX	TRUE		Experimental Sample
UV1934	Chris Sassetti	This manuscript	Outbred_cross	XX	TRUE		Experimental Sample
VC2845	Chris Sassetti	This manuscript	Outbred_cross	XY	TRUE		Experimental Sample
VC6643	Chris Sassetti	This manuscript	Outbred_cross	XY	TRUE		Experimental Sample
VD1103	Chris Sassetti	This manuscript	Outbred_cross	XY	TRUE		Experimental Sample
VD4761	Chris Sassetti	This manuscript	Outbred_cross	XY	TRUE		Experimental Sample
VH4019	Chris Sassetti	This manuscript	Outbred_cross	XY	TRUE		Experimental Sample
VH9021	Chris Sassetti	This manuscript	Outbred_cross	XY	TRUE		Experimental Sample
VK0974	Chris Sassetti	This manuscript	Outbred_cross	XY	TRUE		Experimental Sample
VK6232	Chris Sassetti	This manuscript	Outbred_cross	XY	TRUE		Experimental Sample
VL8523	Chris Sassetti	This manuscript	Outbred_cross	XX	TRUE		Experimental Sample
VN9163	Chris Sassetti	This manuscript	Outbred_cross	XY	TRUE		Experimental Sample
VP1285	Chris Sassetti	This manuscript	Outbred_cross	XY	TRUE		Experimental Sample
VP6053	Chris Sassetti	This manuscript	Outbred_cross	XX	TRUE		Experimental Sample
VP6729	Chris Sassetti	This manuscript	Outbred_cross	XY	TRUE		Experimental Sample
VT1655	Chris Sassetti	This manuscript	Outbred_cross	XX	TRUE		Experimental Sample
VT2116	Chris Sassetti	This manuscript	Outbred_cross	XX	TRUE		Experimental Sample
VW6826	Chris Sassetti	This manuscript	Outbred_cross	XX	TRUE		Experimental Sample
VX5223	Chris Sassetti	This manuscript	Outbred_cross	XX	TRUE		Experimental Sample
VX8709	Chris Sassetti	This manuscript	Outbred_cross	XY	TRUE		Experimental Sample
VZ6672	Chris Sassetti	This manuscript	Outbred_cross	XY	TRUE		Experimental Sample
WA7518	Chris Sassetti	This manuscript	Outbred_cross	XX	TRUE		Experimental Sample
WB2564	Chris Sassetti	This manuscript	Outbred_cross	XY	TRUE		Experimental Sample
WE4048	Chris Sassetti	This manuscript	Outbred_cross	XY	TRUE		Experimental Sample
WE7622	Chris Sassetti	This manuscript	Outbred_cross	XY	TRUE		Experimental Sample
WH5649	Chris Sassetti	This manuscript	Outbred_cross	XX	TRUE		Experimental Sample
WL6068	Chris Sassetti	This manuscript	Outbred_cross	XX	TRUE		Experimental Sample
WN0913	Chris Sassetti	This manuscript	Outbred_cross	XX	TRUE		Experimental Sample
WP0661	Chris Sassetti	This manuscript	Outbred_cross	XY	TRUE		Experimental Sample
WP1416	Chris Sassetti	This manuscript	Outbred_cross	XY	TRUE		Experimental Sample
WS6782	Chris Sassetti	This manuscript	Outbred_cross	XY	TRUE		Experimental Sample
WS7887	Chris Sassetti	This manuscript	Outbred_cross	XY	TRUE		Experimental Sample
WT1376	Chris Sassetti	This manuscript	Outbred_cross	XX	TRUE		Experimental Sample
WU4740	Chris Sassetti	This manuscript	Outbred_cross	XY	TRUE		Experimental Sample
WV5372	Chris Sassetti	This manuscript	Outbred_cross	XY	TRUE		Experimental Sample
WV8059	Chris Sassetti	This manuscript	Outbred_cross	XX	TRUE		Experimental Sample
WV9398	Chris Sassetti	This manuscript	Outbred_cross	XX	TRUE		Experimental Sample
WW0891	Chris Sassetti	This manuscript	Outbred_cross	XX	TRUE		Experimental Sample
WW1001	Chris Sassetti	This manuscript	Outbred_cross	XY	TRUE		Experimental Sample
WW2161	Chris Sassetti	This manuscript	Outbred_cross	XX	TRUE		Experimental Sample
XB2794	Chris Sassetti	This manuscript	Outbred_cross	XY	TRUE		Experimental Sample
XB6460	Chris Sassetti	This manuscript	Outbred_cross	XX	TRUE		Experimental Sample
XC2758	Chris Sassetti	This manuscript	Outbred_cross	XX	TRUE		Experimental Sample
XC7687	Chris Sassetti	This manuscript	Outbred_cross	XY	TRUE		Experimental Sample
XE0725	Chris Sassetti	This manuscript	Outbred_cross	XY	TRUE		Experimental Sample
XF8768	Chris Sassetti	This manuscript	Outbred_cross	XX	TRUE		Experimental Sample
XF9255	Chris Sassetti	This manuscript	Outbred_cross	XY	TRUE		Experimental Sample
XI1320	Chris Sassetti	This manuscript	Outbred_cross	XY	TRUE		Experimental Sample
XJ0805	Chris Sassetti	This manuscript	Outbred_cross	XY	TRUE		Experimental Sample
XN4447	Chris Sassetti	This manuscript	Outbred_cross	XX	TRUE		Experimental Sample
XN4455	Chris Sassetti	This manuscript	Outbred_cross	XY	TRUE		Experimental Sample
XN4857	Chris Sassetti	This manuscript	Outbred_cross	XY	TRUE		Experimental Sample
XQ8813	Chris Sassetti	This manuscript	Outbred_cross	XX	TRUE		Experimental Sample
XS0193	Chris Sassetti	This manuscript	Outbred_cross	XX	TRUE		Experimental Sample
XS8812	Chris Sassetti	This manuscript	Outbred_cross	XY	TRUE		Experimental Sample
XS9230	Chris Sassetti	This manuscript	Outbred_cross	XY	TRUE		Experimental Sample
XS9456	Chris Sassetti	This manuscript	Outbred_cross	XY	TRUE		Experimental Sample
XT5082	Chris Sassetti	This manuscript	Outbred_cross	XX	TRUE		Experimental Sample
XU3558	Chris Sassetti	This manuscript	Outbred_cross	XX	TRUE		Experimental Sample
XU3979	Chris Sassetti	This manuscript	Outbred_cross	XY	TRUE		Experimental Sample
XV9161	Chris Sassetti	This manuscript	Outbred_cross	XX	TRUE		Experimental Sample
XV9818	Chris Sassetti	This manuscript	Outbred_cross	XY	TRUE		Experimental Sample
XX0632	Chris Sassetti	This manuscript	Outbred_cross	XY	TRUE		Experimental Sample
XX4668	Chris Sassetti	This manuscript	Outbred_cross	XX	TRUE		Experimental Sample
YA3448	Chris Sassetti	This manuscript	Outbred_cross	XY	TRUE		Experimental Sample
YA6892	Chris Sassetti	This manuscript	Outbred_cross	XX	TRUE		Experimental Sample
YD0301	Chris Sassetti	This manuscript	Outbred_cross	XY	TRUE		Experimental Sample
YD2904	Chris Sassetti	This manuscript	Outbred_cross	XY	TRUE		Experimental Sample
YE4875	Chris Sassetti	This manuscript	Outbred_cross	XY	TRUE		Experimental Sample
YG9472	Chris Sassetti	This manuscript	Outbred_cross	XY	TRUE		Experimental Sample
YH6987	Chris Sassetti	This manuscript	Outbred_cross	XX	TRUE		Experimental Sample
YH7189	Chris Sassetti	This manuscript	Outbred_cross	XY	TRUE		Experimental Sample
YI0052	Chris Sassetti	This manuscript	Outbred_cross	XY	TRUE		Experimental Sample
YI6544	Chris Sassetti	This manuscript	Outbred_cross	XX	TRUE		Experimental Sample
YL8847	Chris Sassetti	This manuscript	Outbred_cross	XX	TRUE		Experimental Sample
YM5878	Chris Sassetti	This manuscript	Outbred_cross	XY	TRUE		Experimental Sample
YP8534	Chris Sassetti	This manuscript	Outbred_cross	XY	TRUE		Experimental Sample
YR6478	Chris Sassetti	This manuscript	Outbred_cross	XY	TRUE		Experimental Sample
YV3736	Chris Sassetti	This manuscript	Outbred_cross	XY	TRUE		Experimental Sample
YX0040	Chris Sassetti	This manuscript	Outbred_cross	XY	TRUE		Experimental Sample
YX1690	Chris Sassetti	This manuscript	Outbred_cross	XY	TRUE		Experimental Sample
YY6917	Chris Sassetti	This manuscript	Outbred_cross	XY	TRUE		Experimental Sample
YZ8619	Chris Sassetti	This manuscript	Outbred_cross	XX	TRUE		Experimental Sample
ZC5026	Chris Sassetti	This manuscript	Outbred_cross	XY	TRUE		Experimental Sample
ZF9088	Chris Sassetti	This manuscript	Outbred_cross	XY	TRUE		Experimental Sample
ZG8560	Chris Sassetti	This manuscript	Outbred_cross	XY	TRUE		Experimental Sample
ZI1459	Chris Sassetti	This manuscript	Outbred_cross	XY	TRUE		Experimental Sample
ZI7722	Chris Sassetti	This manuscript	Outbred_cross	XY	TRUE		Experimental Sample
ZI9289	Chris Sassetti	This manuscript	Outbred_cross	XY	TRUE		Experimental Sample
ZJ2965	Chris Sassetti	This manuscript	Outbred_cross	XY	TRUE		Experimental Sample
ZL9745	Chris Sassetti	This manuscript	Outbred_cross	XY	TRUE		Experimental Sample
ZM3618	Chris Sassetti	This manuscript	Outbred_cross	XX	TRUE		Experimental Sample
ZM4266	Chris Sassetti	This manuscript	Outbred_cross	XY	TRUE		Experimental Sample
ZN1872	Chris Sassetti	This manuscript	Outbred_cross	XY	TRUE		Experimental Sample
ZN6107	Chris Sassetti	This manuscript	Outbred_cross	XY	TRUE		Experimental Sample
ZN7757	Chris Sassetti	This manuscript	Outbred_cross	XX	TRUE		Experimental Sample
ZP2080	Chris Sassetti	This manuscript	Outbred_cross	XY	TRUE		Experimental Sample
ZS1162	Chris Sassetti	This manuscript	Outbred_cross	XY	TRUE		Experimental Sample
ZT9406	Chris Sassetti	This manuscript	Outbred_cross	XY	TRUE		Experimental Sample
ZU3408	Chris Sassetti	This manuscript	Outbred_cross	XY	TRUE		Experimental Sample
ZV4231	Chris Sassetti	This manuscript	Outbred_cross	XY	TRUE		Experimental Sample
ZW5610	Chris Sassetti	This manuscript	Outbred_cross	XY	TRUE		Experimental Sample
ZY8876	Chris Sassetti	This manuscript	Outbred_cross	XX	TRUE		Experimental Sample
ZZ4382	Chris Sassetti	This manuscript	Outbred_cross	XY	TRUE		Experimental Sample
AH6617	FPMV	Cruz Cisneros et al. 2024	Outbred_cross	XY	TRUE		Experimental Sample
AM4690	FPMV	Cruz Cisneros et al. 2024	Outbred_cross	XY	TRUE		Experimental Sample
AQ3653	FPMV	Cruz Cisneros et al. 2024	Outbred_cross	XY	TRUE		Experimental Sample
AQ7245	FPMV	Cruz Cisneros et al. 2024	Outbred_cross	XY	TRUE		Experimental Sample
AV8823	FPMV	Cruz Cisneros et al. 2024	Outbred_cross	XY	TRUE		Experimental Sample
BJ0601	FPMV	Cruz Cisneros et al. 2024	Outbred_cross	XY	TRUE		Experimental Sample
BK0171	FPMV	Cruz Cisneros et al. 2024	Outbred_cross	XY	TRUE		Experimental Sample
BV9767	FPMV	Cruz Cisneros et al. 2024	Outbred_cross	XY	TRUE		Experimental Sample
BW9209	FPMV	Cruz Cisneros et al. 2024	Outbred_cross	XY	TRUE		Experimental Sample
CA1714	FPMV	Cruz Cisneros et al. 2024	Outbred_cross	XY	TRUE		Experimental Sample
CP9308	FPMV	Cruz Cisneros et al. 2024	Outbred_cross	XY	TRUE		Experimental Sample
CR6190	FPMV	Cruz Cisneros et al. 2024	Outbred_cross	XY	TRUE		Experimental Sample
DA7057	FPMV	Cruz Cisneros et al. 2024	Outbred_cross	XY	TRUE		Experimental Sample
DE6426	FPMV	Cruz Cisneros et al. 2024	Outbred_cross	XY	TRUE		Experimental Sample
DK3449	FPMV	Cruz Cisneros et al. 2024	Outbred_cross	XY	TRUE		Experimental Sample
DL3107	FPMV	Cruz Cisneros et al. 2024	Outbred_cross	XY	TRUE		Experimental Sample
DQ8044	FPMV	Cruz Cisneros et al. 2024	Outbred_cross	XY	TRUE		Experimental Sample
EB8444	FPMV	Cruz Cisneros et al. 2024	Outbred_cross	XY	TRUE		Experimental Sample
EE7610	FPMV	Cruz Cisneros et al. 2024	Outbred_cross	XY	TRUE		Experimental Sample
EG9935	FPMV	Cruz Cisneros et al. 2024	Outbred_cross	XY	TRUE		Experimental Sample
EI5866	FPMV	Cruz Cisneros et al. 2024	Outbred_cross	XY	TRUE		Experimental Sample
FF0817	FPMV	Cruz Cisneros et al. 2024	Outbred_cross	XY	TRUE		Experimental Sample
FJ5819	FPMV	Cruz Cisneros et al. 2024	Outbred_cross	XY	TRUE		Experimental Sample
GA4262	FPMV	Cruz Cisneros et al. 2024	Outbred_cross	XY	TRUE		Experimental Sample
GB4973	FPMV	Cruz Cisneros et al. 2024	Outbred_cross	XY	TRUE		Experimental Sample
GG4217	FPMV	Cruz Cisneros et al. 2024	Outbred_cross	XY	TRUE		Experimental Sample
HE6899	FPMV	Cruz Cisneros et al. 2024	Outbred_cross	XY	TRUE		Experimental Sample
HI4825	FPMV	Cruz Cisneros et al. 2024	Outbred_cross	XY	TRUE		Experimental Sample
HN2357	FPMV	Cruz Cisneros et al. 2024	Outbred_cross	XY	TRUE		Experimental Sample
IP5550	FPMV	Cruz Cisneros et al. 2024	Outbred_cross	XY	TRUE		Experimental Sample
JC7440	FPMV	Cruz Cisneros et al. 2024	Outbred_cross	XY	TRUE		Experimental Sample
JG5729	FPMV	Cruz Cisneros et al. 2024	Outbred_cross	XY	TRUE		Experimental Sample
JT1751	FPMV	Cruz Cisneros et al. 2024	Outbred_cross	XY	TRUE		Experimental Sample
KB0471	FPMV	Cruz Cisneros et al. 2024	Outbred_cross	XY	TRUE		Experimental Sample
KV3596	FPMV	Cruz Cisneros et al. 2024	Outbred_cross	XY	TRUE		Experimental Sample
LF6638	FPMV	Cruz Cisneros et al. 2024	Outbred_cross	XY	TRUE		Experimental Sample
LQ1136	FPMV	Cruz Cisneros et al. 2024	Outbred_cross	XY	TRUE		Experimental Sample
LQ8550	FPMV	Cruz Cisneros et al. 2024	Outbred_cross	XY	TRUE		Experimental Sample
MZ8589	FPMV	Cruz Cisneros et al. 2024	Outbred_cross	XY	TRUE		Experimental Sample
NB7328	FPMV	Cruz Cisneros et al. 2024	Outbred_cross	XY	TRUE		Experimental Sample
NE9218	FPMV	Cruz Cisneros et al. 2024	Outbred_cross	XY	TRUE		Experimental Sample
NJ9713	FPMV	Cruz Cisneros et al. 2024	Outbred_cross	XY	TRUE		Experimental Sample
NY8646	FPMV	Cruz Cisneros et al. 2024	Outbred_cross	XY	TRUE		Experimental Sample
PK3292	FPMV	Cruz Cisneros et al. 2024	Outbred_cross	XY	TRUE		Experimental Sample
PN3522	FPMV	Cruz Cisneros et al. 2024	Outbred_cross	XY	TRUE		Experimental Sample
PQ3812	FPMV	Cruz Cisneros et al. 2024	Outbred_cross	XY	TRUE		Experimental Sample
PR2467	FPMV	Cruz Cisneros et al. 2024	Outbred_cross	XY	TRUE		Experimental Sample
QG4489	FPMV	Cruz Cisneros et al. 2024	Outbred_cross	XY	TRUE		Experimental Sample
QX0800	FPMV	Cruz Cisneros et al. 2024	Outbred_cross	XY	TRUE		Experimental Sample
RL2025	FPMV	Cruz Cisneros et al. 2024	Outbred_cross	XY	TRUE		Experimental Sample
RQ6404	FPMV	Cruz Cisneros et al. 2024	Outbred_cross	XY	TRUE		Experimental Sample
RR0195	FPMV	Cruz Cisneros et al. 2024	Outbred_cross	XY	TRUE		Experimental Sample
RR6174	FPMV	Cruz Cisneros et al. 2024	Outbred_cross	XY	TRUE		Experimental Sample
RS3034	FPMV	Cruz Cisneros et al. 2024	Outbred_cross	XY	TRUE		Experimental Sample
SJ1323	FPMV	Cruz Cisneros et al. 2024	Outbred_cross	XY	TRUE		Experimental Sample
SL7999	FPMV	Cruz Cisneros et al. 2024	Outbred_cross	XY	TRUE		Experimental Sample
SQ8110	FPMV	Cruz Cisneros et al. 2024	Outbred_cross	XY	TRUE		Experimental Sample
SX1038	FPMV	Cruz Cisneros et al. 2024	Outbred_cross	XY	TRUE		Experimental Sample
SZ6219	FPMV	Cruz Cisneros et al. 2024	Outbred_cross	XY	TRUE		Experimental Sample
TA4073	FPMV	Cruz Cisneros et al. 2024	Outbred_cross	XY	TRUE		Experimental Sample
TR5336	FPMV	Cruz Cisneros et al. 2024	Outbred_cross	XY	TRUE		Experimental Sample
UG6453	FPMV	Cruz Cisneros et al. 2024	Outbred_cross	XY	TRUE		Experimental Sample
UI5302	FPMV	Cruz Cisneros et al. 2024	Outbred_cross	XY	TRUE		Experimental Sample
UI7947	FPMV	Cruz Cisneros et al. 2024	Outbred_cross	XY	TRUE		Experimental Sample
UN9486	FPMV	Cruz Cisneros et al. 2024	Outbred_cross	XY	TRUE		Experimental Sample
VA0199	FPMV	Cruz Cisneros et al. 2024	Outbred_cross	XY	TRUE		Experimental Sample
VB9960	FPMV	Cruz Cisneros et al. 2024	Outbred_cross	XY	TRUE		Experimental Sample
VD1527	FPMV	Cruz Cisneros et al. 2024	Outbred_cross	XY	TRUE		Experimental Sample
VE4458	FPMV	Cruz Cisneros et al. 2024	Outbred_cross	XY	TRUE		Experimental Sample
VI6033	FPMV	Cruz Cisneros et al. 2024	Outbred_cross	XY	TRUE		Experimental Sample
VU8440	FPMV	Cruz Cisneros et al. 2024	Outbred_cross	XY	TRUE		Experimental Sample
WD3106	FPMV	Cruz Cisneros et al. 2024	Outbred_cross	XY	TRUE		Experimental Sample
WQ9778	FPMV	Cruz Cisneros et al. 2024	Outbred_cross	XY	TRUE		Experimental Sample
WR6338	FPMV	Cruz Cisneros et al. 2024	Outbred_cross	XY	TRUE		Experimental Sample
WX8859	FPMV	Cruz Cisneros et al. 2024	Outbred_cross	XY	TRUE		Experimental Sample
XB3713	FPMV	Cruz Cisneros et al. 2024	Outbred_cross	XY	TRUE		Experimental Sample
YM5688	FPMV	Cruz Cisneros et al. 2024	Outbred_cross	XY	TRUE		Experimental Sample
YQ1620	FPMV	Cruz Cisneros et al. 2024	Outbred_cross	XY	TRUE		Experimental Sample
YQ2429	FPMV	Cruz Cisneros et al. 2024	Outbred_cross	XY	TRUE		Experimental Sample
YV2162	FPMV	Cruz Cisneros et al. 2024	Outbred_cross	XY	TRUE		Experimental Sample
ZB1861	FPMV	Cruz Cisneros et al. 2024	Outbred_cross	XY	TRUE		Experimental Sample
ZJ8029	FPMV	Cruz Cisneros et al. 2024	Outbred_cross	XY	TRUE		Experimental Sample
ZR3901	FPMV	Cruz Cisneros et al. 2024	Outbred_cross	XY	TRUE		Experimental Sample
ZT8179	FPMV	Cruz Cisneros et al. 2024	Outbred_cross	XY	TRUE		Experimental Sample
AD2371	FPMV	Giusti-RodrÃ­guez et al 2020	Outbred_F1	XY	TRUE		Experimental Sample
AJ3182	FPMV	Giusti-RodrÃ­guez et al 2020	Outbred_F1	XX	TRUE		Experimental Sample
AL0016	FPMV	Giusti-RodrÃ­guez et al 2020	Outbred_F1	XX	TRUE		Experimental Sample
AP9331	FPMV	Giusti-RodrÃ­guez et al 2020	Outbred_F1	XY	TRUE		Experimental Sample
AQ9600	FPMV	Giusti-RodrÃ­guez et al 2020	Outbred_F1	XY	TRUE		Experimental Sample
AU5423	FPMV	Giusti-RodrÃ­guez et al 2020	Outbred_F1	XX	TRUE		Experimental Sample
AX2804	FPMV	Giusti-RodrÃ­guez et al 2020	Outbred_F1	XY	TRUE		Experimental Sample
BF6661	FPMV	Giusti-RodrÃ­guez et al 2020	Outbred_F1	XX	TRUE		Experimental Sample
BJ1876	FPMV	Giusti-RodrÃ­guez et al 2020	Outbred_F1	XX	TRUE		Experimental Sample
BM5601	FPMV	Giusti-RodrÃ­guez et al 2020	Outbred_F1	XX	TRUE		Experimental Sample
BR1975	FPMV	Giusti-RodrÃ­guez et al 2020	Outbred_F1	XX	TRUE		Experimental Sample
BT8317	FPMV	Giusti-RodrÃ­guez et al 2020	Outbred_F1	XX	TRUE		Experimental Sample
BZ4501	FPMV	Giusti-RodrÃ­guez et al 2020	Outbred_F1	XX	TRUE		Experimental Sample
CA2418	FPMV	Giusti-RodrÃ­guez et al 2020	Outbred_F1	XX	TRUE		Experimental Sample
CA2631	FPMV	Giusti-RodrÃ­guez et al 2020	Outbred_F1	XX	TRUE		Experimental Sample
CB3257	FPMV	Giusti-RodrÃ­guez et al 2020	Outbred_F1	XX	TRUE		Experimental Sample
CE1234	FPMV	Giusti-RodrÃ­guez et al 2020	Outbred_F1	XY	TRUE		Experimental Sample
CG5898	FPMV	Giusti-RodrÃ­guez et al 2020	Outbred_F1	XX	TRUE		Experimental Sample
CM0871	FPMV	Giusti-RodrÃ­guez et al 2020	Outbred_F1	XX	TRUE		Experimental Sample
CM1944	FPMV	Giusti-RodrÃ­guez et al 2020	Outbred_F1	XX	TRUE		Experimental Sample
CN6708	FPMV	Giusti-RodrÃ­guez et al 2020	Outbred_F1	XX	TRUE		Experimental Sample
CQ7768	FPMV	Giusti-RodrÃ­guez et al 2020	Outbred_F1	XX	TRUE		Experimental Sample
CR8582	FPMV	Giusti-RodrÃ­guez et al 2020	Outbred_F1	XX	TRUE		Experimental Sample
CX8707	FPMV	Giusti-RodrÃ­guez et al 2020	Outbred_F1	XX	TRUE		Experimental Sample
CZ4598	FPMV	Giusti-RodrÃ­guez et al 2020	Outbred_F1	XY	TRUE		Experimental Sample
CZ6609	FPMV	Giusti-RodrÃ­guez et al 2020	Outbred_F1	XY	TRUE		Experimental Sample
DA9832	FPMV	Giusti-RodrÃ­guez et al 2020	Outbred_F1	XY	TRUE		Experimental Sample
DB0108	FPMV	Giusti-RodrÃ­guez et al 2020	Outbred_F1	XX	TRUE		Experimental Sample
DB0383	FPMV	Giusti-RodrÃ­guez et al 2020	Outbred_F1	XY	TRUE		Experimental Sample
DC5183	FPMV	Giusti-RodrÃ­guez et al 2020	Outbred_F1	XY	TRUE		Experimental Sample
DD0923	FPMV	Giusti-RodrÃ­guez et al 2020	Outbred_F1	XY	TRUE		Experimental Sample
DD2806	FPMV	Giusti-RodrÃ­guez et al 2020	Outbred_F1	XX	TRUE		Experimental Sample
DG8742	FPMV	Giusti-RodrÃ­guez et al 2020	Outbred_F1	XX	TRUE		Experimental Sample
DL3234	FPMV	Giusti-RodrÃ­guez et al 2020	Outbred_F1	XX	TRUE		Experimental Sample
DM5914	FPMV	Giusti-RodrÃ­guez et al 2020	Outbred_F1	XY	TRUE		Experimental Sample
DN2796	FPMV	Giusti-RodrÃ­guez et al 2020	Outbred_F1	XX	TRUE		Experimental Sample
DP3046	FPMV	Giusti-RodrÃ­guez et al 2020	Outbred_F1	XY	TRUE		Experimental Sample
DS3099	FPMV	Giusti-RodrÃ­guez et al 2020	Outbred_F1	XX	TRUE		Experimental Sample
DU4257	FPMV	Giusti-RodrÃ­guez et al 2020	Outbred_F1	XY	TRUE		Experimental Sample
DW4599	FPMV	Giusti-RodrÃ­guez et al 2020	Outbred_F1	XY	TRUE		Experimental Sample
DW9122	FPMV	Giusti-RodrÃ­guez et al 2020	Outbred_F1	XY	TRUE		Experimental Sample
DY1889	FPMV	Giusti-RodrÃ­guez et al 2020	Outbred_F1	XX	TRUE		Experimental Sample
DY1964	FPMV	Giusti-RodrÃ­guez et al 2020	Outbred_F1	XY	TRUE		Experimental Sample
DZ6564	FPMV	Giusti-RodrÃ­guez et al 2020	Outbred_F1	XY	TRUE		Experimental Sample
EB3290	FPMV	Giusti-RodrÃ­guez et al 2020	Outbred_F1	XY	TRUE		Experimental Sample
EI9989	FPMV	Giusti-RodrÃ­guez et al 2020	Outbred_F1	XX	TRUE		Experimental Sample
EW4773	FPMV	Giusti-RodrÃ­guez et al 2020	Outbred_F1	XX	TRUE		Experimental Sample
EZ4147	FPMV	Giusti-RodrÃ­guez et al 2020	Outbred_F1	XX	TRUE		Experimental Sample
EZ6158	FPMV	Giusti-RodrÃ­guez et al 2020	Outbred_F1	XX	TRUE		Experimental Sample
EZ9767	FPMV	Giusti-RodrÃ­guez et al 2020	Outbred_F1	XX	TRUE		Experimental Sample
FB3491	FPMV	Giusti-RodrÃ­guez et al 2020	Outbred_F1	XY	TRUE		Experimental Sample
FM2895	FPMV	Giusti-RodrÃ­guez et al 2020	Outbred_F1	XY	TRUE		Experimental Sample
FP1280	FPMV	Giusti-RodrÃ­guez et al 2020	Outbred_F1	XY	TRUE		Experimental Sample
FP9510	FPMV	Giusti-RodrÃ­guez et al 2020	Outbred_F1	XY	TRUE		Experimental Sample
FS9006	FPMV	Giusti-RodrÃ­guez et al 2020	Outbred_F1	XY	TRUE		Experimental Sample
FT4388	FPMV	Giusti-RodrÃ­guez et al 2020	Outbred_F1	XY	TRUE		Experimental Sample
FT9277	FPMV	Giusti-RodrÃ­guez et al 2020	Outbred_F1	XY	TRUE		Experimental Sample
FW0829	FPMV	Giusti-RodrÃ­guez et al 2020	Outbred_F1	XX	TRUE		Experimental Sample
FX3120	FPMV	Giusti-RodrÃ­guez et al 2020	Outbred_F1	XY	TRUE		Experimental Sample
GA2130	FPMV	Giusti-RodrÃ­guez et al 2020	Outbred_F1	XY	TRUE		Experimental Sample
GB0702	FPMV	Giusti-RodrÃ­guez et al 2020	Outbred_F1	XX	TRUE		Experimental Sample
GB9286	FPMV	Giusti-RodrÃ­guez et al 2020	Outbred_F1	XX	TRUE		Experimental Sample
GC8043	FPMV	Giusti-RodrÃ­guez et al 2020	Outbred_F1	XX	TRUE		Experimental Sample
GF1161	FPMV	Giusti-RodrÃ­guez et al 2020	Outbred_F1	XY	TRUE		Experimental Sample
GG8795	FPMV	Giusti-RodrÃ­guez et al 2020	Outbred_F1	XY	TRUE		Experimental Sample
GI3093	FPMV	Giusti-RodrÃ­guez et al 2020	Outbred_F1	XX	TRUE		Experimental Sample
GL4383	FPMV	Giusti-RodrÃ­guez et al 2020	Outbred_F1	XY	TRUE		Experimental Sample
GM7327	FPMV	Giusti-RodrÃ­guez et al 2020	Outbred_F1	XX	TRUE		Experimental Sample
GN1988	FPMV	Giusti-RodrÃ­guez et al 2020	Outbred_F1	XX	TRUE		Experimental Sample
GT8283	FPMV	Giusti-RodrÃ­guez et al 2020	Outbred_F1	XY	TRUE		Experimental Sample
GT8422	FPMV	Giusti-RodrÃ­guez et al 2020	Outbred_F1	XX	TRUE		Experimental Sample
GW0357	FPMV	Giusti-RodrÃ­guez et al 2020	Outbred_F1	XX	TRUE		Experimental Sample
GW3104	FPMV	Giusti-RodrÃ­guez et al 2020	Outbred_F1	XX	TRUE		Experimental Sample
GZ7184	FPMV	Giusti-RodrÃ­guez et al 2020	Outbred_F1	XY	TRUE		Experimental Sample
HD1558	FPMV	Giusti-RodrÃ­guez et al 2020	Outbred_F1	XY	TRUE		Experimental Sample
HJ1323	FPMV	Giusti-RodrÃ­guez et al 2020	Outbred_F1	XX	TRUE		Experimental Sample
HK0189	FPMV	Giusti-RodrÃ­guez et al 2020	Outbred_F1	XY	TRUE		Experimental Sample
HL2483	FPMV	Giusti-RodrÃ­guez et al 2020	Outbred_F1	XX	TRUE		Experimental Sample
HL3593	FPMV	Giusti-RodrÃ­guez et al 2020	Outbred_F1	XX	TRUE		Experimental Sample
HN5186	FPMV	Giusti-RodrÃ­guez et al 2020	Outbred_F1	XY	TRUE		Experimental Sample
HQ4228	FPMV	Giusti-RodrÃ­guez et al 2020	Outbred_F1	XX	TRUE		Experimental Sample
HS3648	FPMV	Giusti-RodrÃ­guez et al 2020	Outbred_F1	XY	TRUE		Experimental Sample
HV7923	FPMV	Giusti-RodrÃ­guez et al 2020	Outbred_F1	XY	TRUE		Experimental Sample
HX3138	FPMV	Giusti-RodrÃ­guez et al 2020	Outbred_F1	XY	TRUE		Experimental Sample
HX8548	FPMV	Giusti-RodrÃ­guez et al 2020	Outbred_F1	XX	TRUE		Experimental Sample
IB9093	FPMV	Giusti-RodrÃ­guez et al 2020	Outbred_F1	XX	TRUE		Experimental Sample
IC8948	FPMV	Giusti-RodrÃ­guez et al 2020	Outbred_F1	XY	TRUE		Experimental Sample
IH7325	FPMV	Giusti-RodrÃ­guez et al 2020	Outbred_F1	XY	TRUE		Experimental Sample
II9613	FPMV	Giusti-RodrÃ­guez et al 2020	Outbred_F1	XX	TRUE		Experimental Sample
IJ5442	FPMV	Giusti-RodrÃ­guez et al 2020	Outbred_F1	XY	TRUE		Experimental Sample
IK7568	FPMV	Giusti-RodrÃ­guez et al 2020	Outbred_F1	XY	TRUE		Experimental Sample
IM0503	FPMV	Giusti-RodrÃ­guez et al 2020	Outbred_F1	XX	TRUE		Experimental Sample
IM8139	FPMV	Giusti-RodrÃ­guez et al 2020	Outbred_F1	XX	TRUE		Experimental Sample
IP9350	FPMV	Giusti-RodrÃ­guez et al 2020	Outbred_F1	XX	TRUE		Experimental Sample
IR8524	FPMV	Giusti-RodrÃ­guez et al 2020	Outbred_F1	XY	TRUE		Experimental Sample
IX3860	FPMV	Giusti-RodrÃ­guez et al 2020	Outbred_F1	XY	TRUE		Experimental Sample
IY9187	FPMV	Giusti-RodrÃ­guez et al 2020	Outbred_F1	XX	TRUE		Experimental Sample
JA3801	FPMV	Giusti-RodrÃ­guez et al 2020	Outbred_F1	XX	TRUE		Experimental Sample
JD6815	FPMV	Giusti-RodrÃ­guez et al 2020	Outbred_F1	XY	TRUE		Experimental Sample
JG8659	FPMV	Giusti-RodrÃ­guez et al 2020	Outbred_F1	XY	TRUE		Experimental Sample
JJ3571	FPMV	Giusti-RodrÃ­guez et al 2020	Outbred_F1	XY	TRUE		Experimental Sample
JJ3818	FPMV	Giusti-RodrÃ­guez et al 2020	Outbred_F1	XY	TRUE		Experimental Sample
JJ7992	FPMV	Giusti-RodrÃ­guez et al 2020	Outbred_F1	XX	TRUE		Experimental Sample
JK4216	FPMV	Giusti-RodrÃ­guez et al 2020	Outbred_F1	XY	TRUE		Experimental Sample
JL8888	FPMV	Giusti-RodrÃ­guez et al 2020	Outbred_F1	XX	TRUE		Experimental Sample
JN2646	FPMV	Giusti-RodrÃ­guez et al 2020	Outbred_F1	XX	TRUE		Experimental Sample
JQ6732	FPMV	Giusti-RodrÃ­guez et al 2020	Outbred_F1	XY	TRUE		Experimental Sample
JT7733	FPMV	Giusti-RodrÃ­guez et al 2020	Outbred_F1	XY	TRUE		Experimental Sample
JT9797	FPMV	Giusti-RodrÃ­guez et al 2020	Outbred_F1	XY	TRUE		Experimental Sample
JV9399	FPMV	Giusti-RodrÃ­guez et al 2020	Outbred_F1	XY	TRUE		Experimental Sample
JZ5197	FPMV	Giusti-RodrÃ­guez et al 2020	Outbred_F1	XX	TRUE		Experimental Sample
JZ5752	FPMV	Giusti-RodrÃ­guez et al 2020	Outbred_F1	XX	TRUE		Experimental Sample
JZ7426	FPMV	Giusti-RodrÃ­guez et al 2020	Outbred_F1	XX	TRUE		Experimental Sample
KB3537	FPMV	Giusti-RodrÃ­guez et al 2020	Outbred_F1	XX	TRUE		Experimental Sample
KD7247	FPMV	Giusti-RodrÃ­guez et al 2020	Outbred_F1	XX	TRUE		Experimental Sample
KG9942	FPMV	Giusti-RodrÃ­guez et al 2020	Outbred_F1	XX	TRUE		Experimental Sample
KH8214	FPMV	Giusti-RodrÃ­guez et al 2020	Outbred_F1	XY	TRUE		Experimental Sample
KJ1720	FPMV	Giusti-RodrÃ­guez et al 2020	Outbred_F1	XX	TRUE		Experimental Sample
KP0435	FPMV	Giusti-RodrÃ­guez et al 2020	Outbred_F1	XY	TRUE		Experimental Sample
KS3791	FPMV	Giusti-RodrÃ­guez et al 2020	Outbred_F1	XY	TRUE		Experimental Sample
KU6498	FPMV	Giusti-RodrÃ­guez et al 2020	Outbred_F1	XY	TRUE		Experimental Sample
KV2320	FPMV	Giusti-RodrÃ­guez et al 2020	Outbred_F1	XX	TRUE		Experimental Sample
KW4353	FPMV	Giusti-RodrÃ­guez et al 2020	Outbred_F1	XY	TRUE		Experimental Sample
KY2717	FPMV	Giusti-RodrÃ­guez et al 2020	Outbred_F1	XX	TRUE		Experimental Sample
KZ2636	FPMV	Giusti-RodrÃ­guez et al 2020	Outbred_F1	XX	TRUE		Experimental Sample
LA2984	FPMV	Giusti-RodrÃ­guez et al 2020	Outbred_F1	XY	TRUE		Experimental Sample
LA9819	FPMV	Giusti-RodrÃ­guez et al 2020	Outbred_F1	XX	TRUE		Experimental Sample
LB6393	FPMV	Giusti-RodrÃ­guez et al 2020	Outbred_F1	XY	TRUE		Experimental Sample
LD5072	FPMV	Giusti-RodrÃ­guez et al 2020	Outbred_F1	XY	TRUE		Experimental Sample
LD8644	FPMV	Giusti-RodrÃ­guez et al 2020	Outbred_F1	XX	TRUE		Experimental Sample
LE8516	FPMV	Giusti-RodrÃ­guez et al 2020	Outbred_F1	XY	TRUE		Experimental Sample
LF6965	FPMV	Giusti-RodrÃ­guez et al 2020	Outbred_F1	XY	TRUE		Experimental Sample
LG4064	FPMV	Giusti-RodrÃ­guez et al 2020	Outbred_F1	XY	TRUE		Experimental Sample
LH2833	FPMV	Giusti-RodrÃ­guez et al 2020	Outbred_F1	XY	TRUE		Experimental Sample
LJ3143	FPMV	Giusti-RodrÃ­guez et al 2020	Outbred_F1	XX	TRUE		Experimental Sample
LJ3335	FPMV	Giusti-RodrÃ­guez et al 2020	Outbred_F1	XY	TRUE		Experimental Sample
LL0659	FPMV	Giusti-RodrÃ­guez et al 2020	Outbred_F1	XY	TRUE		Experimental Sample
LM2255	FPMV	Giusti-RodrÃ­guez et al 2020	Outbred_F1	XX	TRUE		Experimental Sample
LP1212	FPMV	Giusti-RodrÃ­guez et al 2020	Outbred_F1	XX	TRUE		Experimental Sample
LR5623	FPMV	Giusti-RodrÃ­guez et al 2020	Outbred_F1	XY	TRUE		Experimental Sample
LT6925	FPMV	Giusti-RodrÃ­guez et al 2020	Outbred_F1	XX	TRUE		Experimental Sample
LW7377	FPMV	Giusti-RodrÃ­guez et al 2020	Outbred_F1	XY	TRUE		Experimental Sample
LX1712	FPMV	Giusti-RodrÃ­guez et al 2020	Outbred_F1	XY	TRUE		Experimental Sample
ME9659	FPMV	Giusti-RodrÃ­guez et al 2020	Outbred_F1	XY	TRUE		Experimental Sample
MK2199	FPMV	Giusti-RodrÃ­guez et al 2020	Outbred_F1	XX	TRUE		Experimental Sample
MK7211	FPMV	Giusti-RodrÃ­guez et al 2020	Outbred_F1	XX	TRUE		Experimental Sample
MM1643	FPMV	Giusti-RodrÃ­guez et al 2020	Outbred_F1	XY	TRUE		Experimental Sample
MM4613	FPMV	Giusti-RodrÃ­guez et al 2020	Outbred_F1	XY	TRUE		Experimental Sample
MM5943	FPMV	Giusti-RodrÃ­guez et al 2020	Outbred_F1	XY	TRUE		Experimental Sample
MN5878	FPMV	Giusti-RodrÃ­guez et al 2020	Outbred_F1	XX	TRUE		Experimental Sample
MR2511	FPMV	Giusti-RodrÃ­guez et al 2020	Outbred_F1	XY	TRUE		Experimental Sample
MU9846	FPMV	Giusti-RodrÃ­guez et al 2020	Outbred_F1	XY	TRUE		Experimental Sample
MZ5753	FPMV	Giusti-RodrÃ­guez et al 2020	Outbred_F1	XX	TRUE		Experimental Sample
NC7321	FPMV	Giusti-RodrÃ­guez et al 2020	Outbred_F1	XY	TRUE		Experimental Sample
ND8741	FPMV	Giusti-RodrÃ­guez et al 2020	Outbred_F1	XY	TRUE		Experimental Sample
NE0188	FPMV	Giusti-RodrÃ­guez et al 2020	Outbred_F1	XY	TRUE		Experimental Sample
NI7149	FPMV	Giusti-RodrÃ­guez et al 2020	Outbred_F1	XY	TRUE		Experimental Sample
NJ3086	FPMV	Giusti-RodrÃ­guez et al 2020	Outbred_F1	XX	TRUE		Experimental Sample
NK7643	FPMV	Giusti-RodrÃ­guez et al 2020	Outbred_F1	XX	TRUE		Experimental Sample
NN1707	FPMV	Giusti-RodrÃ­guez et al 2020	Outbred_F1	XX	TRUE		Experimental Sample
NP0052	FPMV	Giusti-RodrÃ­guez et al 2020	Outbred_F1	XY	TRUE		Experimental Sample
NU7224	FPMV	Giusti-RodrÃ­guez et al 2020	Outbred_F1	XX	TRUE		Experimental Sample
NW6387	FPMV	Giusti-RodrÃ­guez et al 2020	Outbred_F1	XY	TRUE		Experimental Sample
PB9725	FPMV	Giusti-RodrÃ­guez et al 2020	Outbred_F1	XY	TRUE		Experimental Sample
PD4498	FPMV	Giusti-RodrÃ­guez et al 2020	Outbred_F1	XY	TRUE		Experimental Sample
PL9521	FPMV	Giusti-RodrÃ­guez et al 2020	Outbred_F1	XX	TRUE		Experimental Sample
PN0084	FPMV	Giusti-RodrÃ­guez et al 2020	Outbred_F1	XX	TRUE		Experimental Sample
PU8948	FPMV	Giusti-RodrÃ­guez et al 2020	Outbred_F1	XY	TRUE		Experimental Sample
PV4726	FPMV	Giusti-RodrÃ­guez et al 2020	Outbred_F1	XY	TRUE		Experimental Sample
PV9925	FPMV	Giusti-RodrÃ­guez et al 2020	Outbred_F1	XX	TRUE		Experimental Sample
PX5357	FPMV	Giusti-RodrÃ­guez et al 2020	Outbred_F1	XY	TRUE		Experimental Sample
PZ4410	FPMV	Giusti-RodrÃ­guez et al 2020	Outbred_F1	XY	TRUE		Experimental Sample
QC7328	FPMV	Giusti-RodrÃ­guez et al 2020	Outbred_F1	XX	TRUE		Experimental Sample
QE3456	FPMV	Giusti-RodrÃ­guez et al 2020	Outbred_F1	XY	TRUE		Experimental Sample
QK6094	FPMV	Giusti-RodrÃ­guez et al 2020	Outbred_F1	XX	TRUE		Experimental Sample
QL7361	FPMV	Giusti-RodrÃ­guez et al 2020	Outbred_F1	XX	TRUE		Experimental Sample
QN1795	FPMV	Giusti-RodrÃ­guez et al 2020	Outbred_F1	XY	TRUE		Experimental Sample
QP0944	FPMV	Giusti-RodrÃ­guez et al 2020	Outbred_F1	XY	TRUE		Experimental Sample
QQ0659	FPMV	Giusti-RodrÃ­guez et al 2020	Outbred_F1	XX	TRUE		Experimental Sample
QQ1603	FPMV	Giusti-RodrÃ­guez et al 2020	Outbred_F1	XY	TRUE		Experimental Sample
QX3065	FPMV	Giusti-RodrÃ­guez et al 2020	Outbred_F1	XX	TRUE		Experimental Sample
QY1850	FPMV	Giusti-RodrÃ­guez et al 2020	Outbred_F1	XY	TRUE		Experimental Sample
QY7219	FPMV	Giusti-RodrÃ­guez et al 2020	Outbred_F1	XY	TRUE		Experimental Sample
RA9437	FPMV	Giusti-RodrÃ­guez et al 2020	Outbred_F1	XX	TRUE		Experimental Sample
RB1339	FPMV	Giusti-RodrÃ­guez et al 2020	Outbred_F1	XX	TRUE		Experimental Sample
RB9850	FPMV	Giusti-RodrÃ­guez et al 2020	Outbred_F1	XX	TRUE		Experimental Sample
RC1665	FPMV	Giusti-RodrÃ­guez et al 2020	Outbred_F1	XX	TRUE		Experimental Sample
RG5486	FPMV	Giusti-RodrÃ­guez et al 2020	Outbred_F1	XY	TRUE		Experimental Sample
RH6371	FPMV	Giusti-RodrÃ­guez et al 2020	Outbred_F1	XX	TRUE		Experimental Sample
RH7635	FPMV	Giusti-RodrÃ­guez et al 2020	Outbred_F1	XY	TRUE		Experimental Sample
RI6319	FPMV	Giusti-RodrÃ­guez et al 2020	Outbred_F1	XX	TRUE		Experimental Sample
RP9889	FPMV	Giusti-RodrÃ­guez et al 2020	Outbred_F1	XY	TRUE		Experimental Sample
RQ2808	FPMV	Giusti-RodrÃ­guez et al 2020	Outbred_F1	XY	TRUE		Experimental Sample
RT2003	FPMV	Giusti-RodrÃ­guez et al 2020	Outbred_F1	XX	TRUE		Experimental Sample
RV9558	FPMV	Giusti-RodrÃ­guez et al 2020	Outbred_F1	XX	TRUE		Experimental Sample
RX2058	FPMV	Giusti-RodrÃ­guez et al 2020	Outbred_F1	XY	TRUE		Experimental Sample
SC2328	FPMV	Giusti-RodrÃ­guez et al 2020	Outbred_F1	XY	TRUE		Experimental Sample
SD4405	FPMV	Giusti-RodrÃ­guez et al 2020	Outbred_F1	XX	TRUE		Experimental Sample
SE9180	FPMV	Giusti-RodrÃ­guez et al 2020	Outbred_F1	XX	TRUE		Experimental Sample
SJ7138	FPMV	Giusti-RodrÃ­guez et al 2020	Outbred_F1	XY	TRUE		Experimental Sample
SK2612	FPMV	Giusti-RodrÃ­guez et al 2020	Outbred_F1	XY	TRUE		Experimental Sample
SK8455	FPMV	Giusti-RodrÃ­guez et al 2020	Outbred_F1	XY	TRUE		Experimental Sample
SM0366	FPMV	Giusti-RodrÃ­guez et al 2020	Outbred_F1	XX	TRUE		Experimental Sample
SQ3762	FPMV	Giusti-RodrÃ­guez et al 2020	Outbred_F1	XX	TRUE		Experimental Sample
ST8966	FPMV	Giusti-RodrÃ­guez et al 2020	Outbred_F1	XX	TRUE		Experimental Sample
SU5151	FPMV	Giusti-RodrÃ­guez et al 2020	Outbred_F1	XY	TRUE		Experimental Sample
SX6443	FPMV	Giusti-RodrÃ­guez et al 2020	Outbred_F1	XY	TRUE		Experimental Sample
SX7531	FPMV	Giusti-RodrÃ­guez et al 2020	Outbred_F1	XX	TRUE		Experimental Sample
SY2293	FPMV	Giusti-RodrÃ­guez et al 2020	Outbred_F1	XX	TRUE		Experimental Sample
SZ1725	FPMV	Giusti-RodrÃ­guez et al 2020	Outbred_F1	XY	TRUE		Experimental Sample
TA8645	FPMV	Giusti-RodrÃ­guez et al 2020	Outbred_F1	XY	TRUE		Experimental Sample
TB0948	FPMV	Giusti-RodrÃ­guez et al 2020	Outbred_F1	XX	TRUE		Experimental Sample
TB6384	FPMV	Giusti-RodrÃ­guez et al 2020	Outbred_F1	XY	TRUE		Experimental Sample
TF4336	FPMV	Giusti-RodrÃ­guez et al 2020	Outbred_F1	XX	TRUE		Experimental Sample
TH1347	FPMV	Giusti-RodrÃ­guez et al 2020	Outbred_F1	XY	TRUE		Experimental Sample
TH5763	FPMV	Giusti-RodrÃ­guez et al 2020	Outbred_F1	XY	TRUE		Experimental Sample
TK9628	FPMV	Giusti-RodrÃ­guez et al 2020	Outbred_F1	XY	TRUE		Experimental Sample
TM9373	FPMV	Giusti-RodrÃ­guez et al 2020	Outbred_F1	XY	TRUE		Experimental Sample
TP1911	FPMV	Giusti-RodrÃ­guez et al 2020	Outbred_F1	XX	TRUE		Experimental Sample
TQ4000	FPMV	Giusti-RodrÃ­guez et al 2020	Outbred_F1	XY	TRUE		Experimental Sample
TX7702	FPMV	Giusti-RodrÃ­guez et al 2020	Outbred_F1	XX	TRUE		Experimental Sample
TY2572	FPMV	Giusti-RodrÃ­guez et al 2020	Outbred_F1	XY	TRUE		Experimental Sample
UH8035	FPMV	Giusti-RodrÃ­guez et al 2020	Outbred_F1	XY	TRUE		Experimental Sample
UI0066	FPMV	Giusti-RodrÃ­guez et al 2020	Outbred_F1	XX	TRUE		Experimental Sample
UI9503	FPMV	Giusti-RodrÃ­guez et al 2020	Outbred_F1	XX	TRUE		Experimental Sample
UM9520	FPMV	Giusti-RodrÃ­guez et al 2020	Outbred_F1	XY	TRUE		Experimental Sample
UR9831	FPMV	Giusti-RodrÃ­guez et al 2020	Outbred_F1	XX	TRUE		Experimental Sample
UU5464	FPMV	Giusti-RodrÃ­guez et al 2020	Outbred_F1	XX	TRUE		Experimental Sample
UZ0400	FPMV	Giusti-RodrÃ­guez et al 2020	Outbred_F1	XY	TRUE		Experimental Sample
VB1936	FPMV	Giusti-RodrÃ­guez et al 2020	Outbred_F1	XY	TRUE		Experimental Sample
VB6933	FPMV	Giusti-RodrÃ­guez et al 2020	Outbred_F1	XY	TRUE		Experimental Sample
VC5801	FPMV	Giusti-RodrÃ­guez et al 2020	Outbred_F1	XX	TRUE		Experimental Sample
VD0199	FPMV	Giusti-RodrÃ­guez et al 2020	Outbred_F1	XY	TRUE		Experimental Sample
VD7510	FPMV	Giusti-RodrÃ­guez et al 2020	Outbred_F1	XY	TRUE		Experimental Sample
VI5793	FPMV	Giusti-RodrÃ­guez et al 2020	Outbred_F1	XX	TRUE		Experimental Sample
VI6431	FPMV	Giusti-RodrÃ­guez et al 2020	Outbred_F1	XX	TRUE		Experimental Sample
VJ6474	FPMV	Giusti-RodrÃ­guez et al 2020	Outbred_F1	XX	TRUE		Experimental Sample
VK4353	FPMV	Giusti-RodrÃ­guez et al 2020	Outbred_F1	XY	TRUE		Experimental Sample
VT2526	FPMV	Giusti-RodrÃ­guez et al 2020	Outbred_F1	XX	TRUE		Experimental Sample
VU3386	FPMV	Giusti-RodrÃ­guez et al 2020	Outbred_F1	XX	TRUE		Experimental Sample
VV7826	FPMV	Giusti-RodrÃ­guez et al 2020	Outbred_F1	XY	TRUE		Experimental Sample
WA1851	FPMV	Giusti-RodrÃ­guez et al 2020	Outbred_F1	XY	TRUE		Experimental Sample
WD5459	FPMV	Giusti-RodrÃ­guez et al 2020	Outbred_F1	XX	TRUE		Experimental Sample
WE2785	FPMV	Giusti-RodrÃ­guez et al 2020	Outbred_F1	XY	TRUE		Experimental Sample
WG2720	FPMV	Giusti-RodrÃ­guez et al 2020	Outbred_F1	XY	TRUE		Experimental Sample
WG4868	FPMV	Giusti-RodrÃ­guez et al 2020	Outbred_F1	XY	TRUE		Experimental Sample
WJ0813	FPMV	Giusti-RodrÃ­guez et al 2020	Outbred_F1	XY	TRUE		Experimental Sample
WK8153	FPMV	Giusti-RodrÃ­guez et al 2020	Outbred_F1	XX	TRUE		Experimental Sample
WK9828	FPMV	Giusti-RodrÃ­guez et al 2020	Outbred_F1	XX	TRUE		Experimental Sample
WL4972	FPMV	Giusti-RodrÃ­guez et al 2020	Outbred_F1	XY	TRUE		Experimental Sample
WM0244	FPMV	Giusti-RodrÃ­guez et al 2020	Outbred_F1	XY	TRUE		Experimental Sample
WM8403	FPMV	Giusti-RodrÃ­guez et al 2020	Outbred_F1	XY	TRUE		Experimental Sample
WN6138	FPMV	Giusti-RodrÃ­guez et al 2020	Outbred_F1	XX	TRUE		Experimental Sample
WP2522	FPMV	Giusti-RodrÃ­guez et al 2020	Outbred_F1	XY	TRUE		Experimental Sample
WQ7583	FPMV	Giusti-RodrÃ­guez et al 2020	Outbred_F1	XY	TRUE		Experimental Sample
WQ8972	FPMV	Giusti-RodrÃ­guez et al 2020	Outbred_F1	XY	TRUE		Experimental Sample
WZ1594	FPMV	Giusti-RodrÃ­guez et al 2020	Outbred_F1	XX	TRUE		Experimental Sample
XA8186	FPMV	Giusti-RodrÃ­guez et al 2020	Outbred_F1	XY	TRUE		Experimental Sample
XC4290	FPMV	Giusti-RodrÃ­guez et al 2020	Outbred_F1	XY	TRUE		Experimental Sample
XC8785	FPMV	Giusti-RodrÃ­guez et al 2020	Outbred_F1	XX	TRUE		Experimental Sample
XF0261	FPMV	Giusti-RodrÃ­guez et al 2020	Outbred_F1	XY	TRUE		Experimental Sample
XH3938	FPMV	Giusti-RodrÃ­guez et al 2020	Outbred_F1	XX	TRUE		Experimental Sample
XI2791	FPMV	Giusti-RodrÃ­guez et al 2020	Outbred_F1	XY	TRUE		Experimental Sample
XN2034	FPMV	Giusti-RodrÃ­guez et al 2020	Outbred_F1	XX	TRUE		Experimental Sample
XN3979	FPMV	Giusti-RodrÃ­guez et al 2020	Outbred_F1	XY	TRUE		Experimental Sample
XT0084	FPMV	Giusti-RodrÃ­guez et al 2020	Outbred_F1	XX	TRUE		Experimental Sample
XY8471	FPMV	Giusti-RodrÃ­guez et al 2020	Outbred_F1	XX	TRUE		Experimental Sample
YB1347	FPMV	Giusti-RodrÃ­guez et al 2020	Outbred_F1	XY	TRUE		Experimental Sample
YB1639	FPMV	Giusti-RodrÃ­guez et al 2020	Outbred_F1	XX	TRUE		Experimental Sample
YH6671	FPMV	Giusti-RodrÃ­guez et al 2020	Outbred_F1	XX	TRUE		Experimental Sample
YJ5520	FPMV	Giusti-RodrÃ­guez et al 2020	Outbred_F1	XY	TRUE		Experimental Sample
YJ6666	FPMV	Giusti-RodrÃ­guez et al 2020	Outbred_F1	XX	TRUE		Experimental Sample
YJ6693	FPMV	Giusti-RodrÃ­guez et al 2020	Outbred_F1	XX	TRUE		Experimental Sample
YK7550	FPMV	Giusti-RodrÃ­guez et al 2020	Outbred_F1	XY	TRUE		Experimental Sample
YM0659	FPMV	Giusti-RodrÃ­guez et al 2020	Outbred_F1	XY	TRUE		Experimental Sample
YM9649	FPMV	Giusti-RodrÃ­guez et al 2020	Outbred_F1	XX	TRUE		Experimental Sample
YN6835	FPMV	Giusti-RodrÃ­guez et al 2020	Outbred_F1	XY	TRUE		Experimental Sample
YP6058	FPMV	Giusti-RodrÃ­guez et al 2020	Outbred_F1	XY	TRUE		Experimental Sample
YX2415	FPMV	Giusti-RodrÃ­guez et al 2020	Outbred_F1	XY	TRUE		Experimental Sample
ZA4866	FPMV	Giusti-RodrÃ­guez et al 2020	Outbred_F1	XY	TRUE		Experimental Sample
ZA9211	FPMV	Giusti-RodrÃ­guez et al 2020	Outbred_F1	XY	TRUE		Experimental Sample
ZC7736	FPMV	Giusti-RodrÃ­guez et al 2020	Outbred_F1	XX	TRUE		Experimental Sample
ZD6539	FPMV	Giusti-RodrÃ­guez et al 2020	Outbred_F1	XX	TRUE		Experimental Sample
ZH0533	FPMV	Giusti-RodrÃ­guez et al 2020	Outbred_F1	XX	TRUE		Experimental Sample
ZI2451	FPMV	Giusti-RodrÃ­guez et al 2020	Outbred_F1	XY	TRUE		Experimental Sample
ZI4012	FPMV	Giusti-RodrÃ­guez et al 2020	Outbred_F1	XY	TRUE		Experimental Sample
ZN5931	FPMV	Giusti-RodrÃ­guez et al 2020	Outbred_F1	XX	TRUE		Experimental Sample
ZR2276	FPMV	Giusti-RodrÃ­guez et al 2020	Outbred_F1	XY	TRUE		Experimental Sample
ZR3822	FPMV	Giusti-RodrÃ­guez et al 2020	Outbred_F1	XX	TRUE		Experimental Sample
ZS0276	FPMV	Giusti-RodrÃ­guez et al 2020	Outbred_F1	XY	TRUE		Experimental Sample
ZW2399	FPMV	Giusti-RodrÃ­guez et al 2020	Outbred_F1	XX	TRUE		Experimental Sample
ZW4725	FPMV	Giusti-RodrÃ­guez et al 2020	Outbred_F1	XY	TRUE		Experimental Sample
ZW5298	FPMV	Giusti-RodrÃ­guez et al 2020	Outbred_F1	XX	TRUE		Experimental Sample
ZX9058	FPMV	Giusti-RodrÃ­guez et al 2020	Outbred_F1	XX	TRUE		Experimental Sample
TY1093	FPMV	Sigmon et al. 2020	Inbred	XY	FALSE	129P1/ReJ	Negative Control
GI5336	FPMV	Sigmon et al. 2020	Inbred	XY	TRUE	129P2/OlaHsd	Negative Control
KE5783	FPMV	Sigmon et al. 2020	Inbred	XY	TRUE	129P2/OlaHsd	Negative Control
GQ5544	FPMV	Sigmon et al. 2020	Inbred	XY	TRUE	129P3/J	Negative Control
RQ5671	FPMV	Sigmon et al. 2020	Inbred	XY	FALSE	129P3/J	Negative Control
TB3280	FPMV	Sigmon et al. 2020	Inbred	XX	FALSE	129P3/J	Negative Control
AW8696	FPMV	Sigmon et al. 2020	Inbred	XY	FALSE	129S1/SvImJ	Negative Control
BD9964	FPMV	Sigmon et al. 2020	Inbred	XX	FALSE	129S1/SvImJ	Negative Control
CZ1658	FPMV	Sigmon et al. 2020	Inbred	XX	FALSE	129S1/SvImJ	Negative Control
ER3924	FPMV	Sigmon et al. 2020	Inbred	XY	FALSE	129S1/SvImJ	Negative Control
FF4465	FPMV	Sigmon et al. 2020	Inbred	XY	TRUE	129S1/SvImJ	Negative Control
LG8484	FPMV	Sigmon et al. 2020	Inbred	XY	TRUE	129S1/SvImJ	Negative Control
LQ1138	FPMV	Sigmon et al. 2020	Inbred	XY	FALSE	129S1/SvImJ	Negative Control
MH4774	FPMV	Sigmon et al. 2020	Inbred	XY	FALSE	129S1/SvImJ	Negative Control
TQ0695	FPMV	Sigmon et al. 2020	Inbred	XX	FALSE	129S1/SvImJ	Negative Control
TU4559	FPMV	Sigmon et al. 2020	Inbred	XY	FALSE	129S1/SvImJ	Negative Control
VM7253	FPMV	Sigmon et al. 2020	Inbred	XY	FALSE	129S1/SvImJ	Negative Control
YU3814	FPMV	Sigmon et al. 2020	Inbred	XY	TRUE	129S1/SvImJ	Negative Control
GI7052	FPMV	Sigmon et al. 2020	Inbred	XY	TRUE	129S2/SvHsd	Negative Control
VD7637	FPMV	Sigmon et al. 2020	Inbred	XY	TRUE	129S2/SvHsd	Negative Control
IX1700	FPMV	Sigmon et al. 2020	Inbred	XY	TRUE	129S2/SvPasOrlRj	Negative Control
PR9086	FPMV	Sigmon et al. 2020	Inbred	XY	TRUE	129S2/SvPasOrlRj	Negative Control
CL1833	FPMV	Sigmon et al. 2020	Inbred	XX	TRUE	129S4/SvJaeJ	Negative Control
EC5678	FPMV	Sigmon et al. 2020	Inbred	XX	FALSE	129S4/SvJaeJ	Negative Control
MP1425	FPMV	Sigmon et al. 2020	Inbred	XY	TRUE	129S4/SvJaeJ	Negative Control
TY9999	FPMV	Sigmon et al. 2020	Inbred	XY	TRUE	129S4/SvJaeJ	Negative Control
BP4212	FPMV	Sigmon et al. 2020	Inbred	XY	FALSE	129S6/SvEvTac	Negative Control
BS7291	FPMV	Sigmon et al. 2020	Inbred	XY	FALSE	129S6/SvEvTac	Negative Control
DJ4638	FPMV	Sigmon et al. 2020	Inbred	XX	TRUE	129S6/SvEvTac	Negative Control
ET8747	FPMV	Sigmon et al. 2020	Inbred	XX	FALSE	129S6/SvEvTac	Negative Control
GE7429	FPMV	Sigmon et al. 2020	Inbred	XX	FALSE	129S6/SvEvTac	Negative Control
IT1493	FPMV	Sigmon et al. 2020	Inbred	XX	TRUE	129S6/SvEvTac	Negative Control
JP9739	FPMV	Sigmon et al. 2020	Inbred	XX	FALSE	129S6/SvEvTac	Negative Control
NG8958	FPMV	Sigmon et al. 2020	Inbred	XY	FALSE	129S6/SvEvTac	Negative Control
NP8285	FPMV	Sigmon et al. 2020	Inbred	XX	FALSE	129S6/SvEvTac	Negative Control
RD6704	FPMV	Sigmon et al. 2020	Inbred	XY	FALSE	129S6/SvEvTac	Negative Control
RN3534	FPMV	Sigmon et al. 2020	Inbred	XX	FALSE	129S6/SvEvTac	Negative Control
YG1548	FPMV	Sigmon et al. 2020	Inbred	XX	FALSE	129S6/SvEvTac	Negative Control
GU4562	FPMV	Sigmon et al. 2020	Inbred	XY	FALSE	129T2/SvEmsJ	Negative Control
IQ6401	FPMV	Sigmon et al. 2020	Inbred	XY	FALSE	129T2/SvEmsJ	Negative Control
LL7636	FPMV	Sigmon et al. 2020	Inbred	XX	TRUE	129T2/SvEmsJ	Negative Control
MF6336	FPMV	Sigmon et al. 2020	Inbred	XX	TRUE	129T2/SvEmsJ	Negative Control
MS2993	FPMV	Sigmon et al. 2020	Inbred	XX	TRUE	129T2/SvEmsJ	Negative Control
FY7122	FPMV	Sigmon et al. 2020	Inbred	XY	FALSE	129X1/SvJ	Negative Control
GC5681	FPMV	Sigmon et al. 2020	Inbred	XX	TRUE	129X1/SvJ	Negative Control
SL5027	FPMV	Sigmon et al. 2020	Inbred	XY	TRUE	129X1/SvJ	Negative Control
WL2134	FPMV	Sigmon et al. 2020	Inbred	XY	TRUE	129X1/SvJ	Negative Control
XI4626	FPMV	Sigmon et al. 2020	Inbred	XX	FALSE	129X1/SvJ	Negative Control
AA8690	FPMV	Sigmon et al. 2020	Inbred	XX	FALSE	A/J	Negative Control
ES4914	FPMV	Sigmon et al. 2020	Inbred	XY	TRUE	A/J	Negative Control
HJ4641	FPMV	Sigmon et al. 2020	Inbred	XY	TRUE	A/J	Negative Control
JW6014	FPMV	Sigmon et al. 2020	Inbred	XX	FALSE	A/J	Negative Control
LP3528	FPMV	Sigmon et al. 2020	Inbred	XY	FALSE	A/J	Negative Control
TT9752	FPMV	Sigmon et al. 2020	Inbred	XY	TRUE	A/J	Negative Control
UK8543	FPMV	Sigmon et al. 2020	Inbred	XY	FALSE	A/J	Negative Control
VY1008	FPMV	Sigmon et al. 2020	Inbred	XY	FALSE	A/J	Negative Control
XB4743	FPMV	Sigmon et al. 2020	Inbred	XY	FALSE	A/J	Negative Control
XW0019	FPMV	Sigmon et al. 2020	Inbred	XY	FALSE	A/J	Negative Control
AF7519	FPMV	Sigmon et al. 2020	Inbred	XX	TRUE	A/JCr	Negative Control
GX8268	FPMV	Sigmon et al. 2020	Inbred	XX	TRUE	A/JCr	Negative Control
CS9800	FPMV	Sigmon et al. 2020	Inbred	XY	FALSE	A/JOlaHsd	Negative Control
ER4089	FPMV	Sigmon et al. 2020	Inbred	XY	TRUE	A/JOlaHsd	Negative Control
IM6629	FPMV	Sigmon et al. 2020	Inbred	XY	TRUE	A/JOlaHsd	Negative Control
LN8936	FPMV	Sigmon et al. 2020	Inbred	XX	TRUE	A/JOlaHsd	Negative Control
PE0301	FPMV	Sigmon et al. 2020	Inbred	XX	FALSE	A/JOlaHsd	Negative Control
KH8006	FPMV	Sigmon et al. 2020	Inbred	XY	FALSE	A/WySnJ	Negative Control
RI6205	FPMV	Sigmon et al. 2020	Inbred	XY	TRUE	A/WySnJ	Negative Control
DB3473	FPMV	Sigmon et al. 2020	Inbred	XY	FALSE	AKR/J	Negative Control
NK3845	FPMV	Sigmon et al. 2020	Inbred	XY	TRUE	AKR/J	Negative Control
CE9538	FPMV	Sigmon et al. 2020	Inbred	XY	FALSE	ALR/LtJ	Negative Control
EL3779	FPMV	Sigmon et al. 2020	Inbred	XY	TRUE	ALS/LtJ	Negative Control
QH4090	FPMV	Sigmon et al. 2020	Inbred	XX	FALSE	ALS/LtJ	Negative Control
UR5103	FPMV	Sigmon et al. 2020	Inbred	XY	FALSE	ALS/LtJ	Negative Control
CT8529	FPMV	Sigmon et al. 2020	Inbred	XY	TRUE	B6N-Tyr<c-Brd>/BrdCrCrl	Negative Control
GZ1124	FPMV	Sigmon et al. 2020	Inbred	XY	FALSE	B6N-Tyr<c-Brd>/BrdCrCrl	Negative Control
LF8881	FPMV	Sigmon et al. 2020	Inbred	XY	FALSE	B6N-Tyr<c-Brd>/BrdCrCrl	Negative Control
FF1099	FPMV	Sigmon et al. 2020	Inbred	XY	FALSE	BALB/cAnNCrl	Negative Control
FU1679	FPMV	Sigmon et al. 2020	Inbred	XY	TRUE	BALB/cAnNCrl	Negative Control
PH6331	FPMV	Sigmon et al. 2020	Inbred	XX	TRUE	BALB/cAnNCrl	Negative Control
UZ4071	FPMV	Sigmon et al. 2020	Inbred	XX	FALSE	BALB/cAnNCrl	Negative Control
CW5011	FPMV	Sigmon et al. 2020	Inbred	XY	TRUE	BALB/cAnNHsd	Negative Control
FE5707	FPMV	Sigmon et al. 2020	Inbred	XY	TRUE	BALB/cAnNHsd	Negative Control
JY5172	FPMV	Sigmon et al. 2020	Inbred	XY	TRUE	BALB/cAnNHsd	Negative Control
LF3197	FPMV	Sigmon et al. 2020	Inbred	XY	FALSE	BALB/cAnNHsd	Negative Control
PW6124	FPMV	Sigmon et al. 2020	Inbred	XY	FALSE	BALB/cAnNHsd	Negative Control
LS0961	FPMV	Sigmon et al. 2020	Inbred	XX	FALSE	BALB/cByJ	Negative Control
MS2916	FPMV	Sigmon et al. 2020	Inbred	XX	FALSE	BALB/cByJ	Negative Control
QQ5384	FPMV	Sigmon et al. 2020	Inbred	XY	FALSE	BALB/cByJ	Negative Control
UT3485	FPMV	Sigmon et al. 2020	Inbred	XY	TRUE	BALB/cByJ	Negative Control
WA8650	FPMV	Sigmon et al. 2020	Inbred	XX	TRUE	BALB/cByJ	Negative Control
YH3304	FPMV	Sigmon et al. 2020	Inbred	XX	TRUE	BALB/cByJ	Negative Control
DH1526	FPMV	Sigmon et al. 2020	Inbred	XY	TRUE	BALB/cByJRj	Experimental Sample
MY9938	FPMV	Sigmon et al. 2020	Inbred	XY	TRUE	BALB/cByJRj	Experimental Sample
AN0426	FPMV	Sigmon et al. 2020	Inbred	XX	FALSE	BALB/cJ	Negative Control
CR4353	FPMV	Sigmon et al. 2020	Inbred	XY	FALSE	BALB/cJ	Negative Control
WV2011	FPMV	Sigmon et al. 2020	Inbred	XX	TRUE	BALB/cJ	Negative Control
XN2343	FPMV	Sigmon et al. 2020	Inbred	XX	TRUE	BALB/cJ	Negative Control
XU4622	FPMV	Sigmon et al. 2020	Inbred	XY	TRUE	BALB/cJ	Negative Control
ZW6143	FPMV	Sigmon et al. 2020	Inbred	XY	FALSE	BALB/cJ	Negative Control
JA3095	FPMV	Sigmon et al. 2020	Inbred	XY	TRUE	BALB/cJBomTac	Negative Control
ZF9381	FPMV	Sigmon et al. 2020	Inbred	XY	TRUE	BALB/cJBomTac	Negative Control
MF3681	FPMV	Sigmon et al. 2020	Inbred	XY	TRUE	BDP/J	Negative Control
UR4854	FPMV	Sigmon et al. 2020	Inbred	XY	FALSE	BDP/J	Negative Control
BQ2571	FPMV	Sigmon et al. 2020	Inbred	XY	FALSE	BTBR T<+> Itpr3<tf>/J	Negative Control
EW4640	FPMV	Sigmon et al. 2020	Inbred	XY	TRUE	BTBR T<+> Itpr3<tf>/J	Negative Control
HA7696	FPMV	Sigmon et al. 2020	Inbred	XY	FALSE	BUB/BnJ	Negative Control
ZQ8546	FPMV	Sigmon et al. 2020	Inbred	XY	TRUE	BUB/BnJ	Negative Control
ET7144	FPMV	Sigmon et al. 2020	Inbred	XY	FALSE	BUSNA	Negative Control
RH1396	FPMV	Sigmon et al. 2020	Inbred	XX	FALSE	BXD1/TyJ	Negative Control
AV6490	FPMV	Sigmon et al. 2020	Inbred	XX	FALSE	BXD11/TyJ	Negative Control
VW7375	FPMV	Sigmon et al. 2020	Inbred	XX	FALSE	BXD12/TyJ	Negative Control
GV0097	FPMV	Sigmon et al. 2020	Inbred	XX	FALSE	BXD13/TyJ	Negative Control
VJ4005	FPMV	Sigmon et al. 2020	Inbred	XX	FALSE	BXD14/TyJ	Negative Control
AG1258	FPMV	Sigmon et al. 2020	Inbred	XX	FALSE	BXD15/TyJ	Negative Control
NN1174	FPMV	Sigmon et al. 2020	Inbred	XX	FALSE	BXD16/TyJ	Negative Control
BN5500	FPMV	Sigmon et al. 2020	Inbred	XX	FALSE	BXD18/TyJ	Negative Control
JM0549	FPMV	Sigmon et al. 2020	Inbred	XX	FALSE	BXD18/TyJ	Negative Control
DF2773	FPMV	Sigmon et al. 2020	Inbred	XX	FALSE	BXD19/TyJ	Negative Control
SL3597	FPMV	Sigmon et al. 2020	Inbred	XX	FALSE	BXD2/TyJ	Negative Control
GR0640	FPMV	Sigmon et al. 2020	Inbred	XX	FALSE	BXD20/TyJ	Negative Control
NW8225	FPMV	Sigmon et al. 2020	Inbred	XX	FALSE	BXD21/TyJ	Negative Control
VI4192	FPMV	Sigmon et al. 2020	Inbred	XX	FALSE	BXD22/TyJ	Negative Control
FI8990	FPMV	Sigmon et al. 2020	Inbred	XX	FALSE	BXD27/TyJ	Negative Control
UL5020	FPMV	Sigmon et al. 2020	Inbred	XX	FALSE	BXD28/TyJ	Negative Control
AJ7433	FPMV	Sigmon et al. 2020	Inbred	XX	FALSE	BXD29/TyJ	Negative Control
RY2808	FPMV	Sigmon et al. 2020	Inbred	XX	FALSE	BXD31/TyJ	Negative Control
RP8116	FPMV	Sigmon et al. 2020	Inbred	XX	FALSE	BXD33/TyJ	Negative Control
RB3100	FPMV	Sigmon et al. 2020	Inbred	XX	FALSE	BXD34/TyJ	Negative Control
MB9229	FPMV	Sigmon et al. 2020	Inbred	XX	FALSE	BXD38/TyJ	Negative Control
JI2408	FPMV	Sigmon et al. 2020	Inbred	XX	FALSE	BXD39/TyJ	Negative Control
KF9416	FPMV	Sigmon et al. 2020	Inbred	XX	FALSE	BXD42/TyJ	Negative Control
XQ0047	FPMV	Sigmon et al. 2020	Inbred	XX	FALSE	BXD44/RwwJ	Negative Control
JS6697	FPMV	Sigmon et al. 2020	Inbred	XX	FALSE	BXD45/RwwJ	Negative Control
ER7360	FPMV	Sigmon et al. 2020	Inbred	XX	FALSE	BXD48/RwwJ	Negative Control
UE3953	FPMV	Sigmon et al. 2020	Inbred	XX	FALSE	BXD49/RwwJ	Negative Control
MT3757	FPMV	Sigmon et al. 2020	Inbred	XX	FALSE	BXD5/TyJ	Negative Control
FG3585	FPMV	Sigmon et al. 2020	Inbred	XX	FALSE	BXD50/RwwJ	Negative Control
ID3137	FPMV	Sigmon et al. 2020	Inbred	XX	FALSE	BXD51/RwwJ	Negative Control
XA3543	FPMV	Sigmon et al. 2020	Inbred	XX	FALSE	BXD55/RwwJ	Negative Control
ZP7382	FPMV	Sigmon et al. 2020	Inbred	XX	FALSE	BXD56/RwwJ	Negative Control
WT9559	FPMV	Sigmon et al. 2020	Inbred	XX	FALSE	BXD6/TyJ	Negative Control
XI3078	FPMV	Sigmon et al. 2020	Inbred	XX	TRUE	BXD6/TyJ	Negative Control
TP0069	FPMV	Sigmon et al. 2020	Inbred	XX	FALSE	BXD60/RwwJ	Negative Control
BZ6764	FPMV	Sigmon et al. 2020	Inbred	XX	FALSE	BXD61/RwwJ	Negative Control
KK9810	FPMV	Sigmon et al. 2020	Inbred	XX	FALSE	BXD62/RwwJ	Negative Control
JP1447	FPMV	Sigmon et al. 2020	Inbred	XX	FALSE	BXD65/RwwJ	Negative Control
JL5674	FPMV	Sigmon et al. 2020	Inbred	XX	FALSE	BXD66/RwwJ	Negative Control
XI6982	FPMV	Sigmon et al. 2020	Inbred	XX	FALSE	BXD68/RwwJ	Negative Control
HE2646	FPMV	Sigmon et al. 2020	Inbred	XX	FALSE	BXD69/RwwJ	Negative Control
WH9454	FPMV	Sigmon et al. 2020	Inbred	XX	FALSE	BXD70/RwwJ	Negative Control
KE4859	FPMV	Sigmon et al. 2020	Inbred	XX	FALSE	BXD73/RwwJ	Negative Control
HZ6023	FPMV	Sigmon et al. 2020	Inbred	XX	FALSE	BXD75/RwwJ	Negative Control
UT3112	FPMV	Sigmon et al. 2020	Inbred	XX	FALSE	BXD77/RwwJ	Negative Control
FC8153	FPMV	Sigmon et al. 2020	Inbred	XX	FALSE	BXD8/TyJ	Negative Control
RK3243	FPMV	Sigmon et al. 2020	Inbred	XX	FALSE	BXD83/RwwJ	Negative Control
RT6373	FPMV	Sigmon et al. 2020	Inbred	XX	FALSE	BXD9/TyJ	Negative Control
BK1133	FPMV	Sigmon et al. 2020	Inbred	XX	FALSE	BXD90/RwwJ	Negative Control
UR1606	FPMV	Sigmon et al. 2020	Inbred	XX	FALSE	BXD98/RwwJ	Negative Control
AT4242	FPMV	Sigmon et al. 2020	Inbred	XY	TRUE	C3H/HeJ	Negative Control
CL6915	FPMV	Sigmon et al. 2020	Inbred	XX	TRUE	C3H/HeJ	Negative Control
PR2814	FPMV	Sigmon et al. 2020	Inbred	XY	FALSE	C3H/HeJ	Negative Control
SK8440	FPMV	Sigmon et al. 2020	Inbred	XX	FALSE	C3H/HeJ	Negative Control
UT2458	FPMV	Sigmon et al. 2020	Inbred	XY	TRUE	C3H/HeJ	Negative Control
ZU8735	FPMV	Sigmon et al. 2020	Inbred	XY	FALSE	C3H/HeJ	Negative Control
CK3256	FPMV	Sigmon et al. 2020	Inbred	XY	TRUE	C3H/HeNCrl	Negative Control
MY0321	FPMV	Sigmon et al. 2020	Inbred	XY	FALSE	C3H/HeNCrl	Negative Control
SA1254	FPMV	Sigmon et al. 2020	Inbred	XY	TRUE	C3H/HeNCrl	Negative Control
XN0291	FPMV	Sigmon et al. 2020	Inbred	XY	TRUE	C3H/HeNCrl	Negative Control
BX5173	FPMV	Sigmon et al. 2020	Inbred	XY	TRUE	C3H/HeNHsd	Negative Control
XA8767	FPMV	Sigmon et al. 2020	Inbred	XY	TRUE	C3H/HeNHsd	Negative Control
YI3267	FPMV	Sigmon et al. 2020	Inbred	XX	FALSE	C3H/HeNHsd	Negative Control
KF5389	FPMV	Sigmon et al. 2020	Inbred	XY	TRUE	C3H/HeNRj	Negative Control
UE5013	FPMV	Sigmon et al. 2020	Inbred	XY	TRUE	C3H/HeNRj	Negative Control
BV3691	FPMV	Sigmon et al. 2020	Inbred	XX	FALSE	C3H/HeNTac	Negative Control
FH7254	FPMV	Sigmon et al. 2020	Inbred	XY	TRUE	C3H/HeNTac	Negative Control
HJ6913	FPMV	Sigmon et al. 2020	Inbred	XY	FALSE	C3H/HeNTac	Negative Control
ND0987	FPMV	Sigmon et al. 2020	Inbred	XX	TRUE	C3H/HeNTac	Negative Control
XD1739	FPMV	Sigmon et al. 2020	Inbred	XX	FALSE	C3H/HeNTac	Negative Control
XJ3395	FPMV	Sigmon et al. 2020	Inbred	XY	FALSE	C3H/HeNTac	Negative Control
AY0358	FPMV	Sigmon et al. 2020	Inbred	XY	TRUE	C3H/HeOuJ	Negative Control
UK9504	FPMV	Sigmon et al. 2020	Inbred	XY	FALSE	C3H/HeOuJ	Negative Control
CN6302	FPMV	Sigmon et al. 2020	Inbred	XX	FALSE	C3HeB/FeJ	Negative Control
RF9292	FPMV	Sigmon et al. 2020	Inbred	XY	FALSE	C3HeB/FeJ	Negative Control
WK5359	FPMV	Sigmon et al. 2020	Inbred	XX	TRUE	C3HeB/FeJ	Negative Control
XP0073	FPMV	Sigmon et al. 2020	Inbred	XY	TRUE	C3HeB/FeJ	Negative Control
HA1734	FPMV	Sigmon et al. 2020	Inbred	XY	FALSE	C57BL/10J	Negative Control
NN6009	FPMV	Sigmon et al. 2020	Inbred	XY	FALSE	C57BL/10J	Negative Control
PX8664	FPMV	Sigmon et al. 2020	Inbred	XY	FALSE	C57BL/10J	Negative Control
XB8099	FPMV	Sigmon et al. 2020	Inbred	XY	TRUE	C57BL/10J	Negative Control
CF2042	FPMV	Sigmon et al. 2020	Inbred	XY	FALSE	C57BL/10ScCr	Negative Control
ME1989	FPMV	Sigmon et al. 2020	Inbred	XY	FALSE	C57BL/10ScCr	Negative Control
DK2036	FPMV	Sigmon et al. 2020	Inbred	XY	FALSE	C57BL/10ScNHsd	Negative Control
JB2135	FPMV	Sigmon et al. 2020	Inbred	XY	TRUE	C57BL/10ScNHsd	Negative Control
KW2313	FPMV	Sigmon et al. 2020	Inbred	XY	TRUE	C57BL/10ScNHsd	Negative Control
SC7264	FPMV	Sigmon et al. 2020	Inbred	XY	FALSE	C57BL/10ScNHsd	Negative Control
VY2457	FPMV	Sigmon et al. 2020	Inbred	XY	FALSE	C57BL/10ScNHsd	Negative Control
PJ6835	FPMV	Sigmon et al. 2020	Inbred	XY	FALSE	C57BL/10ScSnJ	Negative Control
QZ6809	FPMV	Sigmon et al. 2020	Inbred	XY	FALSE	C57BL/10ScSnJ	Negative Control
XV3895	FPMV	Sigmon et al. 2020	Inbred	XY	FALSE	C57BL/10ScSnJ	Negative Control
IL4668	FPMV	Sigmon et al. 2020	Inbred	XY	FALSE	C57BL/10SnJ	Negative Control
RF4758	FPMV	Sigmon et al. 2020	Inbred	XY	TRUE	C57BL/10SnJ	Negative Control
RZ2503	FPMV	Sigmon et al. 2020	Inbred	XY	TRUE	C57BL/10SnJ	Negative Control
TX7451	FPMV	Sigmon et al. 2020	Inbred	XY	TRUE	C57BL/6ByJ	Experimental Sample
KM8800	FPMV	Sigmon et al. 2020	Inbred	XY	TRUE	C57BL/6ByJ	Negative Control
AF4913	FPMV	Sigmon et al. 2020	Inbred	XX	FALSE	C57BL/6J	Negative Control
EC3393	FPMV	Sigmon et al. 2020	Inbred	XY	FALSE	C57BL/6J	Negative Control
EW5318	FPMV	Sigmon et al. 2020	Inbred	XX	FALSE	C57BL/6J	Negative Control
HE0265	FPMV	Sigmon et al. 2020	Inbred	XY	FALSE	C57BL/6J	Negative Control
HY6086	FPMV	Sigmon et al. 2020	Inbred	XY	FALSE	C57BL/6J	Negative Control
MQ0527	FPMV	Sigmon et al. 2020	Inbred	XX	FALSE	C57BL/6J	Negative Control
MS8471	FPMV	Sigmon et al. 2020	Inbred	XX	FALSE	C57BL/6J	Negative Control
NR7942	FPMV	Sigmon et al. 2020	Inbred	XY	FALSE	C57BL/6J	Negative Control
PD3642	FPMV	Sigmon et al. 2020	Inbred	XX	FALSE	C57BL/6J	Negative Control
PU1308	FPMV	Sigmon et al. 2020	Inbred	XY	FALSE	C57BL/6J	Negative Control
QV0865	FPMV	Sigmon et al. 2020	Inbred	XY	FALSE	C57BL/6J	Negative Control
RQ5542	FPMV	Sigmon et al. 2020	Inbred	XY	TRUE	C57BL/6J	Negative Control
RT2194	FPMV	Sigmon et al. 2020	Inbred	XX	TRUE	C57BL/6J	Negative Control
SK0122	FPMV	Sigmon et al. 2020	Inbred	XX	FALSE	C57BL/6J	Negative Control
SK4164	FPMV	Sigmon et al. 2020	Inbred	XY	FALSE	C57BL/6J	Negative Control
TA0664	FPMV	Sigmon et al. 2020	Inbred	XY	TRUE	C57BL/6J	Negative Control
TY7765	FPMV	Sigmon et al. 2020	Inbred	XX	FALSE	C57BL/6J	Negative Control
UX8954	FPMV	Sigmon et al. 2020	Inbred	XX	FALSE	C57BL/6J	Negative Control
VU3755	FPMV	Sigmon et al. 2020	Inbred	XY	FALSE	C57BL/6J	Negative Control
VW1884	FPMV	Sigmon et al. 2020	Inbred	XY	FALSE	C57BL/6J	Negative Control
VZ9440	FPMV	Sigmon et al. 2020	Inbred	XY	FALSE	C57BL/6J	Negative Control
WI1668	FPMV	Sigmon et al. 2020	Inbred	XX	FALSE	C57BL/6J	Negative Control
XH4153	FPMV	Sigmon et al. 2020	Inbred	XX	FALSE	C57BL/6J	Negative Control
XI9586	FPMV	Sigmon et al. 2020	Inbred	XX	FALSE	C57BL/6J	Negative Control
XX4988	FPMV	Sigmon et al. 2020	Inbred	XX	FALSE	C57BL/6J	Negative Control
YD5241	FPMV	Sigmon et al. 2020	Inbred	XY	FALSE	C57BL/6J	Negative Control
YN7476	FPMV	Sigmon et al. 2020	Inbred	XY	FALSE	C57BL/6J	Negative Control
YQ4872	FPMV	Sigmon et al. 2020	Inbred	XY	FALSE	C57BL/6J	Negative Control
DK7725	FPMV	Sigmon et al. 2020	Inbred	XY	TRUE	C57BL/6JBomTac	Negative Control
UM5614	FPMV	Sigmon et al. 2020	Inbred	XY	TRUE	C57BL/6JBomTac	Negative Control
VZ9757	FPMV	Sigmon et al. 2020	Inbred	XY	TRUE	C57BL/6JBomTac	Negative Control
CD9789	FPMV	Sigmon et al. 2020	Inbred	XY	TRUE	C57BL/6JEiJ	Experimental Sample
HZ8991	FPMV	Sigmon et al. 2020	Inbred	XY	TRUE	C57BL/6JEiJ	Negative Control
UB8558	FPMV	Sigmon et al. 2020	Inbred	XY	TRUE	C57BL/6JOlaHsd	Negative Control
DX2968	FPMV	Sigmon et al. 2020	Inbred	XY	TRUE	C57BL/6NCrl	Experimental Sample
UU0671	FPMV	Sigmon et al. 2020	Inbred	XY	TRUE	C57BL/6NCrl	Negative Control
EV4551	FPMV	Sigmon et al. 2020	Inbred	XY	TRUE	C57BL/6NHsd	Experimental Sample
LN3945	FPMV	Sigmon et al. 2020	Inbred	XY	TRUE	C57BL/6NHsd	Negative Control
JP4445	FPMV	Sigmon et al. 2020	Inbred	XY	TRUE	C57BL/6NJ	Experimental Sample
MD5564	FPMV	Sigmon et al. 2020	Inbred	XY	TRUE	C57BL/6NJ	Negative Control
KE1948	FPMV	Sigmon et al. 2020	Inbred	XY	TRUE	C57BL/6NRj	Experimental Sample
ZS0378	FPMV	Sigmon et al. 2020	Inbred	XY	TRUE	C57BL/6NRj	Negative Control
RK3165	FPMV	Sigmon et al. 2020	Inbred	XY	FALSE	C57BL/6NTac	Negative Control
XS7520	FPMV	Sigmon et al. 2020	Inbred	XY	TRUE	C57BLKS/J	Negative Control
YS3377	FPMV	Sigmon et al. 2020	Inbred	XY	FALSE	C57BLKS/J	Negative Control
JS0527	FPMV	Sigmon et al. 2020	Inbred	XX	FALSE	C57BR/cdJ	Negative Control
DV9683	FPMV	Sigmon et al. 2020	Inbred	XY	FALSE	C57L/J	Negative Control
IJ6759	FPMV	Sigmon et al. 2020	Inbred	XX	FALSE	C57L/J	Negative Control
WC6009	FPMV	Sigmon et al. 2020	Inbred	XX	TRUE	C57L/J	Negative Control
XE5163	FPMV	Sigmon et al. 2020	Inbred	XY	FALSE	C57L/J	Negative Control
VN6748	FPMV	Sigmon et al. 2020	Inbred	XY	FALSE	C58/J	Negative Control
ZR5305	FPMV	Sigmon et al. 2020	Inbred	XY	TRUE	C58/J	Negative Control
GT6830	FPMV	Sigmon et al. 2020	Inbred	XY	FALSE	CALB/Rk	Negative Control
WE9016	FPMV	Sigmon et al. 2020	Inbred	XY	FALSE	CALB/Rk	Negative Control
LK2848	FPMV	Sigmon et al. 2020	Inbred	XY	FALSE	CAST/EiJ	Negative Control
NK9495	FPMV	Sigmon et al. 2020	Inbred	XY	FALSE	CAST/EiJ	Negative Control
SZ0126	FPMV	Sigmon et al. 2020	Inbred	XY	FALSE	CAST/EiJ	Negative Control
VM2336	FPMV	Sigmon et al. 2020	Inbred	XY	FALSE	CAST/EiJ	Negative Control
YK4288	FPMV	Sigmon et al. 2020	Inbred	XY	FALSE	CAST/EiJ	Negative Control
GR7014	FPMV	Sigmon et al. 2020	Inbred	XX	FALSE	CBA/CaHN-Btk<xid>/J	Negative Control
VE0493	FPMV	Sigmon et al. 2020	Inbred	XY	TRUE	CBA/CaHN-Btk<xid>/J	Negative Control
ZU4729	FPMV	Sigmon et al. 2020	Inbred	XY	FALSE	CBA/CaHN-Btk<xid>/J	Negative Control
HN5362	FPMV	Sigmon et al. 2020	Inbred	XX	FALSE	CBA/J	Negative Control
HZ2557	FPMV	Sigmon et al. 2020	Inbred	XY	TRUE	CBA/J	Negative Control
FR4015	FPMV	Sigmon et al. 2020	Inbred	XY	FALSE	CIM	Negative Control
JP9046	FPMV	Sigmon et al. 2020	Inbred	XY	FALSE	CIM	Negative Control
SH6623	FPMV	Sigmon et al. 2020	Inbred	XY	FALSE	CKN	Negative Control
BP6644	FPMV	Sigmon et al. 2020	Inbred	XY	FALSE	CZECHI/EiJ	Negative Control
II6799	FPMV	Sigmon et al. 2020	Inbred	XY	FALSE	CZECHI/EiJ	Negative Control
PW6503	FPMV	Sigmon et al. 2020	Inbred	XY	FALSE	CZECHI/EiJ	Negative Control
DD7837	FPMV	Sigmon et al. 2020	Inbred	XY	FALSE	CZECHII/EiJ	Negative Control
QF5713	FPMV	Sigmon et al. 2020	Inbred	XY	FALSE	CZECHII/EiJ	Negative Control
WF4443	FPMV	Sigmon et al. 2020	Inbred	XY	FALSE	CZECHII/EiJ	Negative Control
ZT6281	FPMV	Sigmon et al. 2020	Inbred	XY	FALSE	CZECHII/EiJ	Negative Control
BJ0677	FPMV	Sigmon et al. 2020	Inbred	XY	FALSE	DBA/1J	Negative Control
HM5241	FPMV	Sigmon et al. 2020	Inbred	XY	TRUE	DBA/1J	Negative Control
NX3611	FPMV	Sigmon et al. 2020	Inbred	XY	TRUE	DBA/1J	Negative Control
SA5822	FPMV	Sigmon et al. 2020	Inbred	XY	TRUE	DBA/1J	Negative Control
TS5627	FPMV	Sigmon et al. 2020	Inbred	XY	FALSE	DBA/1J	Negative Control
DJ2634	FPMV	Sigmon et al. 2020	Inbred	XY	TRUE	DBA/1LacJ	Negative Control
IP5213	FPMV	Sigmon et al. 2020	Inbred	XX	TRUE	DBA/1LacJ	Negative Control
SR2727	FPMV	Sigmon et al. 2020	Inbred	XY	FALSE	DBA/1LacJ	Negative Control
UC0155	FPMV	Sigmon et al. 2020	Inbred	XX	FALSE	DBA/1LacJ	Negative Control
VP1141	FPMV	Sigmon et al. 2020	Inbred	XY	FALSE	DBA/1LacJ	Negative Control
WQ8177	FPMV	Sigmon et al. 2020	Inbred	XY	TRUE	DBA/1LacJ	Negative Control
DV4183	FPMV	Sigmon et al. 2020	Inbred	XY	TRUE	DBA/1OlaHsd	Negative Control
EB0006	FPMV	Sigmon et al. 2020	Inbred	XY	TRUE	DBA/1OlaHsd	Negative Control
JE8548	FPMV	Sigmon et al. 2020	Inbred	XY	FALSE	DBA/1OlaHsd	Negative Control
MK8395	FPMV	Sigmon et al. 2020	Inbred	XY	FALSE	DBA/1OlaHsd	Negative Control
MT4510	FPMV	Sigmon et al. 2020	Inbred	XY	TRUE	DBA/1OlaHsd	Negative Control
SE8378	FPMV	Sigmon et al. 2020	Inbred	XY	FALSE	DBA/1OlaHsd	Negative Control
FB6715	FPMV	Sigmon et al. 2020	Inbred	XX	FALSE	DBA/2J	Negative Control
PI5977	FPMV	Sigmon et al. 2020	Inbred	XX	FALSE	DBA/2J	Negative Control
TN0580	FPMV	Sigmon et al. 2020	Inbred	XX	TRUE	DBA/2J	Negative Control
ZX2994	FPMV	Sigmon et al. 2020	Inbred	XX	FALSE	DBA/2J	Negative Control
LZ2088	FPMV	Sigmon et al. 2020	Inbred	XY	TRUE	DBA/2JOlaHsd	Negative Control
QK9777	FPMV	Sigmon et al. 2020	Inbred	XY	TRUE	DBA/2JOlaHsd	Negative Control
CW3536	FPMV	Sigmon et al. 2020	Inbred	XY	FALSE	DBA/2JRj	Negative Control
UN2146	FPMV	Sigmon et al. 2020	Inbred	XY	FALSE	DBA/2JRj	Negative Control
IF8684	FPMV	Sigmon et al. 2020	Inbred	XY	FALSE	DBA/2NCrl	Negative Control
PT2096	FPMV	Sigmon et al. 2020	Inbred	XY	TRUE	DBA/2NCrl	Negative Control
TM5625	FPMV	Sigmon et al. 2020	Inbred	XY	TRUE	DBA/2NCrl	Negative Control
YI6047	FPMV	Sigmon et al. 2020	Inbred	XY	FALSE	DBA/2NCrl	Negative Control
AN0621	FPMV	Sigmon et al. 2020	Inbred	XX	TRUE	DBA/2NTac	Negative Control
AU4367	FPMV	Sigmon et al. 2020	Inbred	XY	FALSE	DBA/2NTac	Negative Control
DM9679	FPMV	Sigmon et al. 2020	Inbred	XY	TRUE	DBA/2NTac	Negative Control
KE6661	FPMV	Sigmon et al. 2020	Inbred	XX	FALSE	DBA/2NTac	Negative Control
YZ5387	FPMV	Sigmon et al. 2020	Inbred	XY	TRUE	DBA/2NTac	Negative Control
KW9619	FPMV	Sigmon et al. 2020	Inbred	XY	FALSE	DDK/Pas	Negative Control
XD7842	FPMV	Sigmon et al. 2020	Inbred	XX	TRUE	DDK/Pas	Negative Control
ED0519	FPMV	Sigmon et al. 2020	Inbred	XX	TRUE	FVB/NCrl	Negative Control
GM4376	FPMV	Sigmon et al. 2020	Inbred	XY	TRUE	FVB/NCrl	Negative Control
JY8845	FPMV	Sigmon et al. 2020	Inbred	XY	TRUE	FVB/NCrl	Negative Control
ZS5387	FPMV	Sigmon et al. 2020	Inbred	XX	FALSE	FVB/NCrl	Negative Control
GQ4294	FPMV	Sigmon et al. 2020	Inbred	XY	FALSE	FVB/NHsd	Negative Control
HI5692	FPMV	Sigmon et al. 2020	Inbred	XY	TRUE	FVB/NHsd	Negative Control
MM1394	FPMV	Sigmon et al. 2020	Inbred	XY	FALSE	FVB/NHsd	Negative Control
SR2238	FPMV	Sigmon et al. 2020	Inbred	XY	TRUE	FVB/NHsd	Negative Control
ZH5062	FPMV	Sigmon et al. 2020	Inbred	XX	TRUE	FVB/NHsd	Negative Control
CN8640	FPMV	Sigmon et al. 2020	Inbred	XY	FALSE	FVB/NJ	Negative Control
PP0685	FPMV	Sigmon et al. 2020	Inbred	XY	TRUE	FVB/NJ	Negative Control
RI6734	FPMV	Sigmon et al. 2020	Inbred	XX	TRUE	FVB/NJ	Negative Control
TT6435	FPMV	Sigmon et al. 2020	Inbred	XX	FALSE	FVB/NJ	Negative Control
VB9997	FPMV	Sigmon et al. 2020	Inbred	XY	TRUE	FVB/NJ	Negative Control
VT7390	FPMV	Sigmon et al. 2020	Inbred	XY	FALSE	FVB/NJ	Negative Control
KQ3208	FPMV	Sigmon et al. 2020	Inbred	XY	TRUE	FVB/NRj	Negative Control
ZB1594	FPMV	Sigmon et al. 2020	Inbred	XY	TRUE	FVB/NRj	Negative Control
RY0970	FPMV	Sigmon et al. 2020	Inbred	XY	TRUE	FVB/NTac	Negative Control
TA4165	FPMV	Sigmon et al. 2020	Inbred	XY	TRUE	FVB/NTac	Negative Control
UN5791	FPMV	Sigmon et al. 2020	Inbred	XX	FALSE	FVB/NTac	Negative Control
YZ1442	FPMV	Sigmon et al. 2020	Inbred	XY	FALSE	FVB/NTac	Negative Control
HC4982	FPMV	Sigmon et al. 2020	Inbred	XY	FALSE	HRS/J	Negative Control
UH6903	FPMV	Sigmon et al. 2020	Inbred	XY	TRUE	HRS/J	Negative Control
DH2141	FPMV	Sigmon et al. 2020	Inbred	XX	FALSE	IS/CamRkJ	Negative Control
QB7708	FPMV	Sigmon et al. 2020	Inbred	XX	FALSE	IS/CamRkJ	Negative Control
AL6649	FPMV	Sigmon et al. 2020	Inbred	XY	FALSE	JF1/Ms	Negative Control
SY4752	FPMV	Sigmon et al. 2020	Inbred	XY	FALSE	JF1/Ms	Negative Control
JC8569	FPMV	Sigmon et al. 2020	Inbred	XY	TRUE	KK/HlJ	Negative Control
ME7642	FPMV	Sigmon et al. 2020	Inbred	XY	FALSE	KK/HlJ	Negative Control
HV6957	FPMV	Sigmon et al. 2020	Inbred	XY	FALSE	LEWES/EiJ	Negative Control
JR1418	FPMV	Sigmon et al. 2020	Inbred	XY	FALSE	LG/J	Negative Control
QM3133	FPMV	Sigmon et al. 2020	Inbred	XY	TRUE	LG/J	Negative Control
AL7795	FPMV	Sigmon et al. 2020	Inbred	XY	TRUE	LP/J	Negative Control
QP6372	FPMV	Sigmon et al. 2020	Inbred	XX	FALSE	LP/J	Negative Control
CQ2578	FPMV	Sigmon et al. 2020	Inbred	XY	FALSE	MAI	Negative Control
BA9957	FPMV	Sigmon et al. 2020	Inbred	XY	FALSE	MBS	Negative Control
PI7290	FPMV	Sigmon et al. 2020	Inbred	XY	FALSE	MDH	Negative Control
XD2168	FPMV	Sigmon et al. 2020	Inbred	XY	FALSE	MOLC/Rk	Negative Control
YJ1293	FPMV	Sigmon et al. 2020	Inbred	XY	FALSE	MOLD/Rk	Negative Control
HA1566	FPMV	Sigmon et al. 2020	Inbred	XY	FALSE	MOLF/EiJ	Negative Control
VW0098	FPMV	Sigmon et al. 2020	Inbred	XY	FALSE	MOLF/EiJ	Negative Control
IG1537	FPMV	Sigmon et al. 2020	Inbred	XY	FALSE	MOLG/Dn	Negative Control
CD9321	FPMV	Sigmon et al. 2020	Inbred	XY	FALSE	MPB	Negative Control
AS3564	FPMV	Sigmon et al. 2020	Inbred	XX	FALSE	MRL/MpJ	Negative Control
QM1484	FPMV	Sigmon et al. 2020	Inbred	XY	TRUE	MRL/MpJ	Negative Control
KJ5251	FPMV	Sigmon et al. 2020	Inbred	XY	FALSE	MSM/MsJ	Negative Control
VX8209	FPMV	Sigmon et al. 2020	Inbred	XY	FALSE	MSM/MsJ	Negative Control
HK5488	FPMV	Sigmon et al. 2020	Inbred	XY	TRUE	NOD/MrkTac	Negative Control
JQ2485	FPMV	Sigmon et al. 2020	Inbred	XX	TRUE	NOD/MrkTac	Negative Control
NG7433	FPMV	Sigmon et al. 2020	Inbred	XY	FALSE	NOD/MrkTac	Negative Control
QT4634	FPMV	Sigmon et al. 2020	Inbred	XY	FALSE	NOD/MrkTac	Negative Control
RC6379	FPMV	Sigmon et al. 2020	Inbred	XY	TRUE	NOD/MrkTac	Negative Control
YH0293	FPMV	Sigmon et al. 2020	Inbred	XX	TRUE	NOD/MrkTac	Negative Control
AJ5252	FPMV	Sigmon et al. 2020	Inbred	XY	FALSE	NOD/ShiLtJ	Negative Control
BP0809	FPMV	Sigmon et al. 2020	Inbred	XY	FALSE	NOD/ShiLtJ	Negative Control
QB1301	FPMV	Sigmon et al. 2020	Inbred	XY	FALSE	NOD/ShiLtJ	Negative Control
QS3729	FPMV	Sigmon et al. 2020	Inbred	XX	FALSE	NOD/ShiLtJ	Negative Control
SG2559	FPMV	Sigmon et al. 2020	Inbred	XY	TRUE	NOD/ShiLtJ	Negative Control
TX9091	FPMV	Sigmon et al. 2020	Inbred	XX	FALSE	NOD/ShiLtJ	Negative Control
TY6942	FPMV	Sigmon et al. 2020	Inbred	XY	FALSE	NOD/ShiLtJ	Negative Control
UZ1687	FPMV	Sigmon et al. 2020	Inbred	XY	TRUE	NOD/ShiLtJ	Negative Control
VH2033	FPMV	Sigmon et al. 2020	Inbred	XY	FALSE	NOD/ShiLtJ	Negative Control
FS1597	FPMV	Sigmon et al. 2020	Inbred	XY	FALSE	NON/ShiLtJ	Negative Control
QH3943	FPMV	Sigmon et al. 2020	Inbred	XY	TRUE	NON/ShiLtJ	Negative Control
BE6544	FPMV	Sigmon et al. 2020	Inbred	XY	FALSE	NOR/LtJ	Negative Control
MH6162	FPMV	Sigmon et al. 2020	Inbred	XY	TRUE	NOR/LtJ	Negative Control
BR0281	FPMV	Sigmon et al. 2020	Inbred	XY	TRUE	NU/J	Negative Control
ER6427	FPMV	Sigmon et al. 2020	Inbred	XY	FALSE	NU/J	Negative Control
CT5222	FPMV	Sigmon et al. 2020	Inbred	XY	FALSE	NZB/BlNJ	Negative Control
IG4454	FPMV	Sigmon et al. 2020	Inbred	XY	TRUE	NZB/BlNJ	Negative Control
CZ7831	FPMV	Sigmon et al. 2020	Inbred	XY	FALSE	NZO/HlLtJ	Negative Control
HI4426	FPMV	Sigmon et al. 2020	Inbred	XX	FALSE	NZO/HlLtJ	Negative Control
JQ4260	FPMV	Sigmon et al. 2020	Inbred	XY	TRUE	NZO/HlLtJ	Negative Control
KD6687	FPMV	Sigmon et al. 2020	Inbred	XY	FALSE	NZO/HlLtJ	Negative Control
QK3802	FPMV	Sigmon et al. 2020	Inbred	XY	TRUE	NZO/HlLtJ	Negative Control
TM7207	FPMV	Sigmon et al. 2020	Inbred	XY	FALSE	NZO/HlLtJ	Negative Control
VB4031	FPMV	Sigmon et al. 2020	Inbred	XY	FALSE	NZO/HlLtJ	Negative Control
WV6708	FPMV	Sigmon et al. 2020	Inbred	XX	FALSE	NZO/HlLtJ	Negative Control
XB8529	FPMV	Sigmon et al. 2020	Inbred	XX	FALSE	NZO/HlLtJ	Negative Control
YB7269	FPMV	Sigmon et al. 2020	Inbred	XY	TRUE	NZO/HlLtJ	Negative Control
HB0420	FPMV	Sigmon et al. 2020	Inbred	XY	FALSE	NZW/LacJ	Negative Control
MF8048	FPMV	Sigmon et al. 2020	Inbred	XY	TRUE	NZW/LacJ	Negative Control
CE4417	FPMV	Sigmon et al. 2020	Inbred	XY	FALSE	PERA/EiJ	Negative Control
DT3699	FPMV	Sigmon et al. 2020	Inbred	XY	FALSE	PERA/EiJ	Negative Control
RM5590	FPMV	Sigmon et al. 2020	Inbred	XY	FALSE	PERC/EiJ	Negative Control
ZP1349	FPMV	Sigmon et al. 2020	Inbred	XY	FALSE	PERC/EiJ	Negative Control
LR6793	FPMV	Sigmon et al. 2020	Inbred	XY	FALSE	PWD/PhJ	Negative Control
NL5315	FPMV	Sigmon et al. 2020	Inbred	XY	FALSE	PWD/PhJ	Negative Control
AZ4072	FPMV	Sigmon et al. 2020	Inbred	XX	FALSE	PWK/PhJ	Negative Control
DA3324	FPMV	Sigmon et al. 2020	Inbred	XY	FALSE	PWK/PhJ	Negative Control
DD6818	FPMV	Sigmon et al. 2020	Inbred	XY	FALSE	PWK/PhJ	Negative Control
EF4870	FPMV	Sigmon et al. 2020	Inbred	XX	FALSE	PWK/PhJ	Negative Control
LJ1443	FPMV	Sigmon et al. 2020	Inbred	XY	FALSE	PWK/PhJ	Negative Control
MI4224	FPMV	Sigmon et al. 2020	Inbred	XY	FALSE	PWK/PhJ	Negative Control
NA1358	FPMV	Sigmon et al. 2020	Inbred	XY	FALSE	PWK/PhJ	Negative Control
UU6961	FPMV	Sigmon et al. 2020	Inbred	XX	FALSE	PWK/PhJ	Negative Control
WB0792	FPMV	Sigmon et al. 2020	Inbred	XX	FALSE	PWK/PhJ	Negative Control
AU5654	FPMV	Sigmon et al. 2020	Inbred	XY	FALSE	RBA/DnJ	Negative Control
RD2274	FPMV	Sigmon et al. 2020	Inbred	XY	FALSE	RBA/DnJ	Negative Control
BX2933	FPMV	Sigmon et al. 2020	Inbred	XY	FALSE	RBF/DnJ	Negative Control
MF9096	FPMV	Sigmon et al. 2020	Inbred	XY	FALSE	SF/CamEiJ	Negative Control
NU1056	FPMV	Sigmon et al. 2020	Inbred	XY	FALSE	SF/CamEiJ	Negative Control
DE4432	FPMV	Sigmon et al. 2020	Inbred	XY	FALSE	SFM	Negative Control
KX6102	FPMV	Sigmon et al. 2020	Inbred	XY	FALSE	SFM	Negative Control
BX9141	FPMV	Sigmon et al. 2020	Inbred	XY	FALSE	SJL/J	Negative Control
TD5786	FPMV	Sigmon et al. 2020	Inbred	XY	TRUE	SJL/J	Negative Control
JU6688	FPMV	Sigmon et al. 2020	Inbred	XY	FALSE	SM/J	Negative Control
PE0902	FPMV	Sigmon et al. 2020	Inbred	XY	TRUE	SM/J	Negative Control
BQ1970	FPMV	Sigmon et al. 2020	Inbred	XY	FALSE	SMZ	Negative Control
NA1759	FPMV	Sigmon et al. 2020	Inbred	XY	FALSE	SMZ	Negative Control
CC8745	FPMV	Sigmon et al. 2020	Inbred	XY	FALSE	SPRET/EiJ	Negative Control
YQ8653	FPMV	Sigmon et al. 2020	Inbred	XY	FALSE	SPRET/EiJ	Negative Control
LS1934	FPMV	Sigmon et al. 2020	Inbred	XY	TRUE	SWR/J	Negative Control
MK9893	FPMV	Sigmon et al. 2020	Inbred	XX	FALSE	SWR/J	Negative Control
HQ9522	FPMV	Sigmon et al. 2020	Inbred	XY	FALSE	TIRANO/EiJ	Negative Control
WY4797	FPMV	Sigmon et al. 2020	Inbred	XY	FALSE	TIRANO/EiJ	Negative Control
IR6808	FPMV	Sigmon et al. 2020	Inbred	XY	FALSE	WMP/Pas	Negative Control
YI1656	FPMV	Sigmon et al. 2020	Inbred	XY	FALSE	WMP/Pas	Negative Control
KN9546	FPMV	Sigmon et al. 2020	Inbred	XY	FALSE	WSB/EiJ	Negative Control
QV6949	FPMV	Sigmon et al. 2020	Inbred	XX	FALSE	WSB/EiJ	Negative Control
RU0746	FPMV	Sigmon et al. 2020	Inbred	XY	FALSE	WSB/EiJ	Negative Control
SR5883	FPMV	Sigmon et al. 2020	Inbred	XX	FALSE	WSB/EiJ	Negative Control
TA3509	FPMV	Sigmon et al. 2020	Inbred	XX	FALSE	WSB/EiJ	Negative Control
TQ1697	FPMV	Sigmon et al. 2020	Inbred	XY	FALSE	WSB/EiJ	Negative Control
UU6536	FPMV	Sigmon et al. 2020	Inbred	XY	FALSE	WSB/EiJ	Negative Control
WB9673	FPMV	Sigmon et al. 2020	Inbred	XX	FALSE	WSB/EiJ	Negative Control
XK8996	FPMV	Sigmon et al. 2020	Inbred	XY	FALSE	WSB/EiJ	Negative Control
RD5963	FPMV	Sigmon et al. 2020	Inbred	XY	FALSE	XBS	Negative Control
ES9260	FPMV	Sigmon et al. 2020	Inbred	XY	FALSE	ZALENDE/EiJ	Negative Control
HQ9864	FPMV	Sigmon et al. 2020	Inbred	XY	FALSE	ZALENDE/EiJ	Negative Control
AA8055	FPMV	Sigmon et al. 2020	Outbred_cross	XY	TRUE		Experimental Sample
AB0376	FPMV	Sigmon et al. 2020	Outbred_cross	XY	TRUE		Experimental Sample
AC2169	FPMV	Sigmon et al. 2020	Outbred_cross	XY	TRUE		Experimental Sample
AD0996	FPMV	Sigmon et al. 2020	Outbred_cross	XX	TRUE		Experimental Sample
AF2043	FPMV	Sigmon et al. 2020	Outbred_cross	XY	TRUE		Experimental Sample
AG1133	FPMV	Sigmon et al. 2020	Outbred_cross	XX	TRUE		Experimental Sample
AH7719	FPMV	Sigmon et al. 2020	Outbred_cross	XY	TRUE		Experimental Sample
AJ9883	FPMV	Sigmon et al. 2020	Outbred_cross	XY	TRUE		Experimental Sample
AN1306	FPMV	Sigmon et al. 2020	Outbred_F1	XX	TRUE		Experimental Sample
AN2573	FPMV	Sigmon et al. 2020	Outbred_cross	XX	TRUE		Experimental Sample
AQ2173	FPMV	Sigmon et al. 2020	Inbred	XY	TRUE		Experimental Sample
AQ7697	FPMV	Sigmon et al. 2020	Outbred_cross	XY	TRUE		Experimental Sample
AS0134	FPMV	Sigmon et al. 2020	Outbred_cross	XY	TRUE		Experimental Sample
AV0687	FPMV	Sigmon et al. 2020	Outbred_cross	XX	TRUE		Experimental Sample
AV2535	FPMV	Sigmon et al. 2020	Outbred_cross	XXY	TRUE		Experimental Sample
AV7060	FPMV	Sigmon et al. 2020	Outbred_cross	XX	TRUE		Experimental Sample
AV7545	FPMV	Sigmon et al. 2020	Inbred	XX	TRUE		Experimental Sample
AX0971	FPMV	Sigmon et al. 2020	Outbred_cross	XY	TRUE		Experimental Sample
AX9483	FPMV	Sigmon et al. 2020	Outbred_cross	XX	TRUE		Experimental Sample
AY3116	FPMV	Sigmon et al. 2020	Outbred_cross	XY	TRUE		Experimental Sample
AY6532	FPMV	Sigmon et al. 2020	Outbred_cross	XY	TRUE		Experimental Sample
BB2647	FPMV	Sigmon et al. 2020	Outbred_F1	XX	TRUE		Experimental Sample
BD2008	FPMV	Sigmon et al. 2020	Outbred_cross	XY	TRUE		Experimental Sample
BD2984	FPMV	Sigmon et al. 2020	Outbred_cross	XY	TRUE		Experimental Sample
BE2845	FPMV	Sigmon et al. 2020	Outbred_cross	XX	TRUE		Experimental Sample
BE6599	FPMV	Sigmon et al. 2020	Outbred_cross	XX	TRUE		Experimental Sample
BE6669	FPMV	Sigmon et al. 2020	Outbred_cross	XX	TRUE		Experimental Sample
BF5043	FPMV	Sigmon et al. 2020	Outbred_cross	XX	TRUE		Experimental Sample
BG7527	FPMV	Sigmon et al. 2020	Outbred_cross	XX	TRUE		Experimental Sample
BH1003	FPMV	Sigmon et al. 2020	Outbred_cross	XX	TRUE		Experimental Sample
BI1988	FPMV	Sigmon et al. 2020	Outbred_cross	XX	TRUE		Experimental Sample
BI9980	FPMV	Sigmon et al. 2020	Outbred_cross	XY	TRUE		Experimental Sample
BJ0805	FPMV	Sigmon et al. 2020	Outbred_cross	XX	TRUE		Experimental Sample
BJ3972	FPMV	Sigmon et al. 2020	Outbred_cross	XX	TRUE		Experimental Sample
BJ4963	FPMV	Sigmon et al. 2020	Outbred_cross	XX	TRUE		Experimental Sample
BJ9705	FPMV	Sigmon et al. 2020	Outbred_cross	XY	TRUE		Experimental Sample
BK0294	FPMV	Sigmon et al. 2020	Outbred_cross	XX	TRUE		Experimental Sample
BL6736	FPMV	Sigmon et al. 2020	Outbred_cross	XX	TRUE		Experimental Sample
BM9632	FPMV	Sigmon et al. 2020	Outbred_cross	XX	TRUE		Experimental Sample
BN2239	FPMV	Sigmon et al. 2020	Outbred_cross	XX	TRUE		Experimental Sample
BN5210	FPMV	Sigmon et al. 2020	Outbred_cross	XX	TRUE		Experimental Sample
BN5517	FPMV	Sigmon et al. 2020	Outbred_F1	XX	TRUE		Experimental Sample
BP8913	FPMV	Sigmon et al. 2020	Outbred_cross	XX	TRUE		Experimental Sample
BQ7037	FPMV	Sigmon et al. 2020	Outbred_cross	XX	TRUE		Experimental Sample
BR0146	FPMV	Sigmon et al. 2020	Outbred_cross	XX	TRUE		Experimental Sample
BR1630	FPMV	Sigmon et al. 2020	Outbred_cross	XX	TRUE		Experimental Sample
BS9638	FPMV	Sigmon et al. 2020	Outbred_cross	XX	TRUE		Experimental Sample
BT7570	FPMV	Sigmon et al. 2020	Outbred_cross	XX	TRUE		Experimental Sample
BU3246	FPMV	Sigmon et al. 2020	Outbred_cross	XX	TRUE		Experimental Sample
BX2214	FPMV	Sigmon et al. 2020	Outbred_cross	XX	TRUE		Experimental Sample
BZ2560	FPMV	Sigmon et al. 2020	Outbred_cross	XX	TRUE		Experimental Sample
BZ3673	FPMV	Sigmon et al. 2020	Outbred_cross	XX	TRUE		Experimental Sample
BZ8851	FPMV	Sigmon et al. 2020	Outbred_F1	XY	TRUE		Experimental Sample
CA9124	FPMV	Sigmon et al. 2020	Outbred_cross	XX	TRUE		Experimental Sample
CB8852	FPMV	Sigmon et al. 2020	Outbred_cross	XY	TRUE		Experimental Sample
CC0558	FPMV	Sigmon et al. 2020	Outbred_cross	XX	TRUE		Experimental Sample
CC3956	FPMV	Sigmon et al. 2020	Outbred_cross	XY	TRUE		Experimental Sample
CC6428	FPMV	Sigmon et al. 2020	Inbred	XX	TRUE		Experimental Sample
CC9034	FPMV	Sigmon et al. 2020	Outbred_cross	XX	TRUE		Experimental Sample
CC9269	FPMV	Sigmon et al. 2020	Outbred_cross	XX	TRUE		Experimental Sample
CD1873	FPMV	Sigmon et al. 2020	Outbred_cross	XY	TRUE		Experimental Sample
CD3490	FPMV	Sigmon et al. 2020	Outbred_cross	XX	TRUE		Experimental Sample
CD4039	FPMV	Sigmon et al. 2020	Outbred_cross	XX	TRUE		Experimental Sample
CF6491	FPMV	Sigmon et al. 2020	Outbred_cross	XX	TRUE		Experimental Sample
CG0483	FPMV	Sigmon et al. 2020	Outbred_cross	XX	TRUE		Experimental Sample
CG0580	FPMV	Sigmon et al. 2020	Outbred_F1	XX	TRUE		Experimental Sample
CG2477	FPMV	Sigmon et al. 2020	Outbred_cross	XY	TRUE		Experimental Sample
CH2726	FPMV	Sigmon et al. 2020	Outbred_cross	XX	TRUE		Experimental Sample
CI7287	FPMV	Sigmon et al. 2020	Outbred_cross	XX	TRUE		Experimental Sample
CJ6397	FPMV	Sigmon et al. 2020	Outbred_cross	XX	TRUE		Experimental Sample
CK0722	FPMV	Sigmon et al. 2020	Outbred_cross	XX	TRUE		Experimental Sample
CK6460	FPMV	Sigmon et al. 2020	Outbred_cross	XX	TRUE		Experimental Sample
CK7725	FPMV	Sigmon et al. 2020	Outbred_cross	XX	TRUE		Experimental Sample
CL5198	FPMV	Sigmon et al. 2020	Outbred_cross	XX	TRUE		Experimental Sample
CM4744	FPMV	Sigmon et al. 2020	Outbred_cross	XY	TRUE		Experimental Sample
CP4698	FPMV	Sigmon et al. 2020	Outbred_cross	XX	TRUE		Experimental Sample
CP7350	FPMV	Sigmon et al. 2020	Outbred_cross	XX	TRUE		Experimental Sample
CP7818	FPMV	Sigmon et al. 2020	Outbred_cross	XY	TRUE		Experimental Sample
CQ1411	FPMV	Sigmon et al. 2020	Outbred_cross	XX	TRUE		Experimental Sample
CR8717	FPMV	Sigmon et al. 2020	Outbred_cross	XX	TRUE		Experimental Sample
CT0037	FPMV	Sigmon et al. 2020	Outbred_cross	XX	TRUE		Experimental Sample
CT5181	FPMV	Sigmon et al. 2020	Outbred_cross	XY	TRUE		Experimental Sample
CT8033	FPMV	Sigmon et al. 2020	Outbred_cross	XX	TRUE		Experimental Sample
CU5953	FPMV	Sigmon et al. 2020	Outbred_cross	XX	TRUE		Experimental Sample
CV0149	FPMV	Sigmon et al. 2020	Outbred_cross	XX	TRUE		Experimental Sample
CV2941	FPMV	Sigmon et al. 2020	Outbred_cross	XY	TRUE		Experimental Sample
CV6849	FPMV	Sigmon et al. 2020	Inbred	XX	TRUE		Experimental Sample
CW2438	FPMV	Sigmon et al. 2020	Outbred_cross	XX	TRUE		Experimental Sample
CW4358	FPMV	Sigmon et al. 2020	Outbred_F1	XX	TRUE		Experimental Sample
CX4853	FPMV	Sigmon et al. 2020	Outbred_cross	XX	TRUE		Experimental Sample
CX5199	FPMV	Sigmon et al. 2020	Outbred_cross	XY	TRUE		Experimental Sample
CX8121	FPMV	Sigmon et al. 2020	Outbred_cross	XY	TRUE		Experimental Sample
CX9506	FPMV	Sigmon et al. 2020	Outbred_cross	XY	TRUE		Experimental Sample
CY7529	FPMV	Sigmon et al. 2020	Outbred_cross	XX	TRUE		Experimental Sample
CY8217	FPMV	Sigmon et al. 2020	Outbred_cross	XY	TRUE		Experimental Sample
CZ2127	FPMV	Sigmon et al. 2020	Outbred_F1	XX	TRUE		Experimental Sample
CZ9843	FPMV	Sigmon et al. 2020	Inbred	XY	TRUE		Experimental Sample
DB0451	FPMV	Sigmon et al. 2020	Outbred_cross	XX	TRUE		Experimental Sample
DB3842	FPMV	Sigmon et al. 2020	Outbred_cross	XO	TRUE		Experimental Sample
DD0911	FPMV	Sigmon et al. 2020	Outbred_cross	XY	TRUE		Experimental Sample
DD7652	FPMV	Sigmon et al. 2020	Outbred_cross	XX	TRUE		Experimental Sample
DE1203	FPMV	Sigmon et al. 2020	Outbred_cross	XX	TRUE		Experimental Sample
DE3979	FPMV	Sigmon et al. 2020	Outbred_cross	XX	TRUE		Experimental Sample
DE8180	FPMV	Sigmon et al. 2020	Outbred_cross	XY	TRUE		Experimental Sample
DF8621	FPMV	Sigmon et al. 2020	Outbred_cross	XY	TRUE		Experimental Sample
DH7243	FPMV	Sigmon et al. 2020	Outbred_cross	XX	TRUE		Experimental Sample
DI5699	FPMV	Sigmon et al. 2020	Outbred_cross	XX	TRUE		Experimental Sample
DI7179	FPMV	Sigmon et al. 2020	Outbred_cross	XY	TRUE		Experimental Sample
DI8544	FPMV	Sigmon et al. 2020	Outbred_cross	XX	TRUE		Experimental Sample
DJ7590	FPMV	Sigmon et al. 2020	Outbred_cross	XX	TRUE		Experimental Sample
DK2641	FPMV	Sigmon et al. 2020	Outbred_cross	XY	TRUE		Experimental Sample
DK4293	FPMV	Sigmon et al. 2020	Outbred_cross	XX	TRUE		Experimental Sample
DK9454	FPMV	Sigmon et al. 2020	Outbred_cross	XX	TRUE		Experimental Sample
DL2100	FPMV	Sigmon et al. 2020	Outbred_cross	XX	TRUE		Experimental Sample
DL5535	FPMV	Sigmon et al. 2020	Outbred_F1	XX	TRUE		Experimental Sample
DL6682	FPMV	Sigmon et al. 2020	Outbred_cross	XY	TRUE		Experimental Sample
DL8761	FPMV	Sigmon et al. 2020	Outbred_cross	XX	TRUE		Experimental Sample
DL9785	FPMV	Sigmon et al. 2020	Outbred_cross	XX	TRUE		Experimental Sample
DP7949	FPMV	Sigmon et al. 2020	Outbred_cross	XX	TRUE		Experimental Sample
DQ0963	FPMV	Sigmon et al. 2020	Outbred_cross	XY	TRUE		Experimental Sample
DQ6585	FPMV	Sigmon et al. 2020	Outbred_cross	XX	TRUE		Experimental Sample
DR0085	FPMV	Sigmon et al. 2020	Outbred_F1	XX	TRUE		Experimental Sample
DR0909	FPMV	Sigmon et al. 2020	Outbred_cross	XX	TRUE		Experimental Sample
DR2100	FPMV	Sigmon et al. 2020	Outbred_cross	XY	TRUE		Experimental Sample
DR3105	FPMV	Sigmon et al. 2020	Outbred_cross	XX	TRUE		Experimental Sample
DR4366	FPMV	Sigmon et al. 2020	Outbred_cross	XX	TRUE		Experimental Sample
DT2452	FPMV	Sigmon et al. 2020	Outbred_cross	XY	TRUE		Experimental Sample
DU6116	FPMV	Sigmon et al. 2020	Outbred_cross	XY	TRUE		Experimental Sample
DU6216	FPMV	Sigmon et al. 2020	Outbred_cross	XX	TRUE		Experimental Sample
DV2231	FPMV	Sigmon et al. 2020	Outbred_cross	XY	TRUE		Experimental Sample
DY1458	FPMV	Sigmon et al. 2020	Outbred_cross	XY	TRUE		Experimental Sample
DZ3613	FPMV	Sigmon et al. 2020	Outbred_cross	XY	TRUE		Experimental Sample
EA2448	FPMV	Sigmon et al. 2020	Outbred_cross	XX	TRUE		Experimental Sample
EA2948	FPMV	Sigmon et al. 2020	Outbred_cross	XY	TRUE		Experimental Sample
EB3043	FPMV	Sigmon et al. 2020	Outbred_cross	XX	TRUE		Experimental Sample
EB6215	FPMV	Sigmon et al. 2020	Outbred_cross	XX	TRUE		Experimental Sample
EB6844	FPMV	Sigmon et al. 2020	Outbred_cross	XX	TRUE		Experimental Sample
EC1496	FPMV	Sigmon et al. 2020	Outbred_cross	XY	TRUE		Experimental Sample
EC6933	FPMV	Sigmon et al. 2020	Outbred_cross	XX	TRUE		Experimental Sample
EC9945	FPMV	Sigmon et al. 2020	Outbred_cross	XX	TRUE		Experimental Sample
ED8184	FPMV	Sigmon et al. 2020	Outbred_cross	XX	TRUE		Experimental Sample
ED8781	FPMV	Sigmon et al. 2020	Outbred_cross	XX	TRUE		Experimental Sample
EE0032	FPMV	Sigmon et al. 2020	Inbred	XY	TRUE		Experimental Sample
EF0588	FPMV	Sigmon et al. 2020	Outbred_cross	XX	TRUE		Experimental Sample
EF5168	FPMV	Sigmon et al. 2020	Outbred_cross	XX	TRUE		Experimental Sample
EF5323	FPMV	Sigmon et al. 2020	Outbred_cross	XY	TRUE		Experimental Sample
EH1329	FPMV	Sigmon et al. 2020	Outbred_cross	XX	TRUE		Experimental Sample
EH1981	FPMV	Sigmon et al. 2020	Outbred_cross	XX	TRUE		Experimental Sample
EH9943	FPMV	Sigmon et al. 2020	Outbred_cross	XX	TRUE		Experimental Sample
EI0712	FPMV	Sigmon et al. 2020	Outbred_cross	XY	TRUE		Experimental Sample
EI1783	FPMV	Sigmon et al. 2020	Outbred_cross	XY	TRUE		Experimental Sample
EI4835	FPMV	Sigmon et al. 2020	Outbred_cross	XX	TRUE		Experimental Sample
EJ4320	FPMV	Sigmon et al. 2020	Outbred_cross	XY	TRUE		Experimental Sample
EJ4846	FPMV	Sigmon et al. 2020	Outbred_cross	XY	TRUE		Experimental Sample
EJ4888	FPMV	Sigmon et al. 2020	Outbred_cross	XX	TRUE		Experimental Sample
EJ8227	FPMV	Sigmon et al. 2020	Outbred_cross	XX	TRUE		Experimental Sample
EK2330	FPMV	Sigmon et al. 2020	Outbred_cross	XX	TRUE		Experimental Sample
EL0554	FPMV	Sigmon et al. 2020	Outbred_cross	XX	TRUE		Experimental Sample
EL1386	FPMV	Sigmon et al. 2020	Outbred_cross	XY	TRUE		Experimental Sample
EL2206	FPMV	Sigmon et al. 2020	Outbred_cross	XX	TRUE		Experimental Sample
EL8988	FPMV	Sigmon et al. 2020	Outbred_cross	XX	TRUE		Experimental Sample
EM3488	FPMV	Sigmon et al. 2020	Outbred_cross	XY	TRUE		Experimental Sample
EM7931	FPMV	Sigmon et al. 2020	Outbred_cross	XX	TRUE		Experimental Sample
EN4049	FPMV	Sigmon et al. 2020	Inbred	XY	TRUE		Experimental Sample
EQ0441	FPMV	Sigmon et al. 2020	Outbred_cross	XX	TRUE		Experimental Sample
EQ4721	FPMV	Sigmon et al. 2020	Outbred_cross	XY	TRUE		Experimental Sample
EQ4900	FPMV	Sigmon et al. 2020	Outbred_cross	XY	TRUE		Experimental Sample
ER1409	FPMV	Sigmon et al. 2020	Outbred_cross	XX	TRUE		Experimental Sample
ER1533	FPMV	Sigmon et al. 2020	Outbred_cross	XX	TRUE		Experimental Sample
ER1871	FPMV	Sigmon et al. 2020	Outbred_cross	XX	TRUE		Experimental Sample
ER2755	FPMV	Sigmon et al. 2020	Outbred_cross	XX	TRUE		Experimental Sample
ES5697	FPMV	Sigmon et al. 2020	Outbred_cross	XX	TRUE		Experimental Sample
ET5039	FPMV	Sigmon et al. 2020	Outbred_cross	XX	TRUE		Experimental Sample
ET7775	FPMV	Sigmon et al. 2020	Outbred_cross	XY	TRUE		Experimental Sample
EU3265	FPMV	Sigmon et al. 2020	Outbred_cross	XX	TRUE		Experimental Sample
EV1483	FPMV	Sigmon et al. 2020	Outbred_F1	XX	TRUE		Experimental Sample
EW1924	FPMV	Sigmon et al. 2020	Outbred_cross	XX	TRUE		Experimental Sample
EX2118	FPMV	Sigmon et al. 2020	Outbred_cross	XX	TRUE		Experimental Sample
EX4824	FPMV	Sigmon et al. 2020	Outbred_cross	XX	TRUE		Experimental Sample
EX8259	FPMV	Sigmon et al. 2020	Outbred_cross	XX	TRUE		Experimental Sample
EY2768	FPMV	Sigmon et al. 2020	Inbred	XY	TRUE		Experimental Sample
EZ4112	FPMV	Sigmon et al. 2020	Outbred_cross	XX	TRUE		Experimental Sample
EZ5429	FPMV	Sigmon et al. 2020	Outbred_cross	XX	TRUE		Experimental Sample
EZ7429	FPMV	Sigmon et al. 2020	Outbred_cross	XY	TRUE		Experimental Sample
FA1331	FPMV	Sigmon et al. 2020	Outbred_cross	XX	TRUE		Experimental Sample
FB7537	FPMV	Sigmon et al. 2020	Outbred_F1	XY	TRUE		Experimental Sample
FB7974	FPMV	Sigmon et al. 2020	Outbred_cross	XX	TRUE		Experimental Sample
FC3218	FPMV	Sigmon et al. 2020	Outbred_cross	XY	TRUE		Experimental Sample
FD2363	FPMV	Sigmon et al. 2020	Outbred_cross	XY	TRUE		Experimental Sample
FD3021	FPMV	Sigmon et al. 2020	Outbred_cross	XX	TRUE		Experimental Sample
FD9803	FPMV	Sigmon et al. 2020	Outbred_cross	XX	TRUE		Experimental Sample
FE1179	FPMV	Sigmon et al. 2020	Outbred_cross	XY	TRUE		Experimental Sample
FE6653	FPMV	Sigmon et al. 2020	Outbred_cross	XY	TRUE		Experimental Sample
FF6354	FPMV	Sigmon et al. 2020	Outbred_F1	XX	TRUE		Experimental Sample
FG1616	FPMV	Sigmon et al. 2020	Outbred_cross	XX	TRUE		Experimental Sample
FH3636	FPMV	Sigmon et al. 2020	Outbred_cross	XX	TRUE		Experimental Sample
FH4892	FPMV	Sigmon et al. 2020	Outbred_cross	XX	TRUE		Experimental Sample
FH6078	FPMV	Sigmon et al. 2020	Outbred_cross	XX	TRUE		Experimental Sample
FH8581	FPMV	Sigmon et al. 2020	Outbred_cross	XX	TRUE		Experimental Sample
FI8707	FPMV	Sigmon et al. 2020	Outbred_cross	XX	TRUE		Experimental Sample
FJ5533	FPMV	Sigmon et al. 2020	Outbred_cross	XX	TRUE		Experimental Sample
FK4752	FPMV	Sigmon et al. 2020	Outbred_cross	XY	TRUE		Experimental Sample
FL1027	FPMV	Sigmon et al. 2020	Outbred_cross	XX	TRUE		Experimental Sample
FL2041	FPMV	Sigmon et al. 2020	Outbred_cross	XX	TRUE		Experimental Sample
FL6433	FPMV	Sigmon et al. 2020	Outbred_cross	XY	TRUE		Experimental Sample
FL6520	FPMV	Sigmon et al. 2020	Outbred_cross	XY	TRUE		Experimental Sample
FL9153	FPMV	Sigmon et al. 2020	Outbred_F1	XX	TRUE		Experimental Sample
FM1793	FPMV	Sigmon et al. 2020	Outbred_cross	XX	TRUE		Experimental Sample
FM5337	FPMV	Sigmon et al. 2020	Outbred_cross	XX	TRUE		Experimental Sample
FM5767	FPMV	Sigmon et al. 2020	Outbred_cross	XY	TRUE		Experimental Sample
FN4369	FPMV	Sigmon et al. 2020	Outbred_cross	XX	TRUE		Experimental Sample
FP1802	FPMV	Sigmon et al. 2020	Outbred_cross	XX	TRUE		Experimental Sample
FP3535	FPMV	Sigmon et al. 2020	Inbred	XX	TRUE		Experimental Sample
FP3910	FPMV	Sigmon et al. 2020	Outbred_cross	XY	TRUE		Experimental Sample
FQ2521	FPMV	Sigmon et al. 2020	Outbred_cross	XX	TRUE		Experimental Sample
FT9439	FPMV	Sigmon et al. 2020	Outbred_cross	XX	TRUE		Experimental Sample
FU9657	FPMV	Sigmon et al. 2020	Inbred	XX	TRUE		Experimental Sample
FW4874	FPMV	Sigmon et al. 2020	Outbred_F1	XX	TRUE		Experimental Sample
FW9166	FPMV	Sigmon et al. 2020	Outbred_cross	XX	TRUE		Experimental Sample
FX4708	FPMV	Sigmon et al. 2020	Outbred_cross	XX	TRUE		Experimental Sample
FX7476	FPMV	Sigmon et al. 2020	Outbred_cross	XX	TRUE		Experimental Sample
FY2904	FPMV	Sigmon et al. 2020	Outbred_cross	XY	TRUE		Experimental Sample
FY5695	FPMV	Sigmon et al. 2020	Outbred_cross	XY	TRUE		Experimental Sample
FY8327	FPMV	Sigmon et al. 2020	Outbred_cross	XX	TRUE		Experimental Sample
FY9566	FPMV	Sigmon et al. 2020	Outbred_cross	XX	TRUE		Experimental Sample
GA8437	FPMV	Sigmon et al. 2020	Outbred_cross	XX	TRUE		Experimental Sample
GA9987	FPMV	Sigmon et al. 2020	Outbred_cross	XX	TRUE		Experimental Sample
GB3241	FPMV	Sigmon et al. 2020	Outbred_cross	XX	TRUE		Experimental Sample
GC7229	FPMV	Sigmon et al. 2020	Outbred_cross	XX	TRUE		Experimental Sample
GC8020	FPMV	Sigmon et al. 2020	Outbred_cross	XY	TRUE		Experimental Sample
GD3496	FPMV	Sigmon et al. 2020	Outbred_cross	XX	TRUE		Experimental Sample
GD5456	FPMV	Sigmon et al. 2020	Outbred_cross	XX	TRUE		Experimental Sample
GE0080	FPMV	Sigmon et al. 2020	Outbred_cross	XY	TRUE		Experimental Sample
GG0509	FPMV	Sigmon et al. 2020	Outbred_cross	XX	TRUE		Experimental Sample
GG4402	FPMV	Sigmon et al. 2020	Outbred_cross	XX	TRUE		Experimental Sample
[truncated: 7,290 more rows]
